# Supplementary material
Source: publisher figshare collection journal article supplement (https://acs.figshare.com/ndownloader/files/4772494)
Supplement: Supplementary file 1 [file 4772494]

# A Route to Regioselectively Functionalized Carbazoles, Dibenzofurans, and Dibenzothiophenes through Anionic Cyclization of Benzyne-tethered Aryllithiums

*Roberto Sanz,<sup>\*,†</sup> Yolanda Fernández,<sup>†,§</sup> M<sup>a</sup> Pilar Castroviejo,<sup>†</sup> Antonio Pérez,<sup>†</sup> and Francisco J.  
Fañanás<sup>‡</sup>*

Departamento de Química, Área de Química Orgánica, Facultad de Ciencias, Universidad de Burgos,  
Pza. Misael Bañuelos s/n, 09001-Burgos, Spain, and Instituto Universitario de Química Organometálica  
“Enrique Moles”, Universidad de Oviedo, C/ Julián Clavería, 8, 33006-Oviedo, Spain

rsd@ubu.es

## Supporting Information

### Index

|                                           |      |
|-------------------------------------------|------|
| General Considerations                    | S-2  |
| Typical Procedures and Spectroscopic Data | S-2  |
| Spectra                                   | S-17 |
| References                                | S-48 |

**General Considerations.** All reactions involving air-sensitive compounds were carried out under an N<sub>2</sub> atmosphere in oven-dried glassware with magnetic stirring. Temperatures are reported as bath temperatures. THF were continuously refluxed and freshly distilled from sodium under nitrogen. Solvents used in extraction and purification were distilled prior to use. TLC was performed on alumina-backed plates coated with silica gel 60 with F<sub>254</sub> indicator; the chromatograms were visualized by UV light (254 nm) and/or by staining with a Ce/Mo reagent, anisaldehyde or phosphomolybdic acid solution and subsequent heating. *R<sub>f</sub>* values refer to silica gel. Flash column chromatography was carried out on silica gel 60, 230-400 mesh. Melting points were obtained with open capillary tubes and are uncorrected. <sup>1</sup>H NMR spectra were recorded at 400, 300, or 200 MHz. Chemical shifts are reported in ppm from tetramethylsilane with the residual solvent resonance as the internal standard (CHCl<sub>3</sub>: δ 7.16; DMSO-d<sub>6</sub>: δ 2.54). Data are reported as follows: chemical shift, multiplicity (s: singlet, br s: broad singlet, d: doublet, dd: doublet of doublets, dt: doublet of triplets, t: triplet, td: triplet of doublets, q: quartet, m: multiplet), coupling constants (*J* in Hz) and integration. <sup>13</sup>C NMR spectra were recorded at 100.6, 75.4, or 50.3 MHz using broadband proton decoupling. Chemical shifts are reported in ppm with the solvent resonance as internal standard (CDCl<sub>3</sub>: δ 76.95; DMSO-d<sub>6</sub>: δ 40.15). Low-resolution electron impact mass spectra (EI-LRMS) were obtained at 70 eV on a mass spectrometer and only the molecular ions and/or base peaks in MS are given. High-resolution mass spectrometry (HRMS) was carried out on a mass spectrometer. Infrared spectra were recorded with a FT-IR spectrophotometer. Elemental analyses were performed on a microanalyzer. All commercially available reagents were used without purification unless otherwise indicated and were purchased from standard chemical suppliers.

**Synthesis of *N*-(2-Fluorophenyl)-*N*-methyl-2-nitroaniline (1a):**<sup>1</sup> Under nitrogen atmosphere an oven-dried Schlenk flask was charged with Cs<sub>2</sub>CO<sub>3</sub> (6.84 g, 21 mmol), Pd<sub>2</sub>(dba)<sub>3</sub> (0.413 g, 0.45 mmol) and BINAP (0.420 g, 0.67 mmol). *N*-methyl-2-fluoroaniline (2.25 g, 18 mmol), 1-bromo-2-nitrobenzene (3.03 g, 15 mmol) and toluene (30 mL) were added, and the mixture was heated to 100 °C with stirring until the starting material had been consumed as judged by GC-MS analysis (ca. 16 h). The mixture was

cooled to room temperature, diluted with Et<sub>2</sub>O (40 mL), filtered, and concentrated under reduced pressure. The residue was purified by silica gel column chromatography (hexane/EtOAc, 50/1) to afford the titled compound (2.92 g, 79%) as an orange oil: *R<sub>f</sub>* 0.21 (hexane/EtOAc, 50/1); <sup>1</sup>H NMR (400 MHz, CDCl<sub>3</sub>) δ 7.87 (dd, *J* = 8.0, 1.6 Hz, 1H), 7.30 (dt, *J* = 7.6, 1.6 Hz, 1H), 7.11 (dd, *J* = 8.0, 1.6 Hz, 1H), 7.05-6.81 (m, 5H), 3.21 (s, 3H); <sup>13</sup>C NMR (100.6 MHz, CDCl<sub>3</sub>) δ 156.2 (d, *J* = 249.7 Hz, C), 143.0 (C), 142.3 (C), 135.6 (d, *J* = 9.9 Hz, C), 133.3 (CH), 125.9 (CH), 125.2 (d, *J* = 7.8 Hz, CH), 124.6 (d, *J* = 2.0 Hz, CH), 123.4 (d, *J* = 2.9 Hz, CH), 122.5 (CH), 121.6 (CH), 116.8 (d, *J* = 20.1 Hz, CH), 41.1 (d, *J* = 2.5 Hz, CH<sub>3</sub>); EI-LRMS *m/z* 246 (M<sup>+</sup>, 53), 198 (100); HRMS calcd for C<sub>13</sub>H<sub>11</sub>FN<sub>2</sub>O<sub>2</sub>, 246.0805; found, 246.0812.

**Synthesis of *N*-(3-Dimethylaminopropyl)-*N*-(2-fluorophenyl)-2-nitroaniline (1b):** A solution of *N*-(3-dimethylaminopropyl)-2-fluoroaniline (3.53 g, 18 mmol) in THF (60 mL) was treated with *n*-BuLi (7.2 mL of a 2.5M solution in hexane, 18 mmol) at –50 °C. The reaction mixture was stirred for 15 min at this temperature and then was allowed to reach room temperature and stirring was continued for 45 min. The reaction mixture was cooled to –78 °C and a solution of 1-chloro-2-nitrobenzene (4.26 g, 27 mmol) in THF (20 mL) was added dropwise. After 10 min at this temperature the reaction was refluxed overnight. The mixture was quenched with water, extracted with AcOEt (3 x 30 mL) and the combined organic layers were washed with a saturated Na<sub>2</sub>CO<sub>3</sub> aqueous solution and dried over anhydrous Na<sub>2</sub>SO<sub>4</sub>. The solvents were removed under reduced pressure and the residue was purified by silica gel column chromatography (hexane/AcOEt, 15/1) to give the titled compound (3.31 g, 58%) as a red oil: *R<sub>f</sub>* 0.45 (hexane/EtOAc, 10/1); <sup>1</sup>H NMR (400 MHz, CDCl<sub>3</sub>) δ 7.62 (dd, *J* = 8.0, 1.6 Hz, 1H), 7.46 (ddd, *J* = 8.0, 7.2, 1.6 Hz, 1H), 7.35 (dd, *J* = 8.4, 1.2 Hz, 1H), 7.03-6.93 (m, 5H), 3.79-3.74 (m, 2H), 2.30 (t, *J* = 6.8 Hz, 2H), 2.18 (s, 6H), 1.85-1.74 (m, 2H); <sup>13</sup>C NMR (100.6 MHz, CDCl<sub>3</sub>) δ 156.5 (d, *J* = 249.6 Hz, C), 143.1 (C), 141.9 (C), 134.4 (d, *J* = 10.0 Hz, C), 133.0 (CH), 125.8 (CH), 124.9 (d, *J* = 7.6 Hz, CH), 124.6 (d, *J* = 1.5 Hz, CH), 124.4 (d, *J* = 3.1 Hz, CH), 123.2 (CH), 121.5 (CH), 116.7 (d, *J* = 19.9 Hz,

CH), 56.5 (CH<sub>2</sub>), 51.1 (d,  $J = 2.2$  Hz, CH<sub>2</sub>), 45.3 (CH<sub>2</sub>), 25.5 (CH<sub>3</sub>); EI-LRMS  $m/z$  317 (M<sup>+</sup>, 2), 102 (100); HRMS calcd for C<sub>17</sub>H<sub>20</sub>FN<sub>3</sub>O<sub>2</sub>, 317.1540; found, 317.1551.

**Typical Procedure for the Synthesis of *N*-Alkyl-*N*-(2-fluorophenyl)benzene-1,2-diamines **2a-b**:**<sup>2</sup>

To a solution of the corresponding aromatic nitro compound **1a,b** (10 mmol) in MeOH (100 mL) was added anhydrous CuCl (2.97 g, 30 mmol). KBH<sub>4</sub> (3.78 g, 70 mmol) was added to this mixture in portions with stirring at room temperature. After the addition, the reaction mixture was stirred for 30 min. Then, MeOH was removed under reduced pressure, water (100 mL) was added, and the mixture was extracted with EtOAc (3 x 20 mL). The combined organic layers were dried over anhydrous Na<sub>2</sub>SO<sub>4</sub>. The solvents were removed under reduced pressure and the residue was purified by silica gel column chromatography (hexane/EtOAc) to provide the corresponding tertiary amine:

***N*-(2-Fluorophenyl)-*N*-methylbenzene-1,2-diamine (**2a**):** KBH<sub>4</sub> (3.78 g, 70 mmol) was added to a solution of **1a** (2.46 g, 10 mmol) and CuCl (2.97 g, 30 mmol) in MeOH (100 mL). Workup as above gave the title compound (2.03 g, 94%) as a yellow oil:  $R_f$  0.14 (hexane/EtOAc, 25/1); <sup>1</sup>H NMR (400 MHz, CDCl<sub>3</sub>)  $\delta$  7.09-6.88 (m, 6H), 6.80 (dd,  $J = 8.0, 1.2$  Hz, 1H), 6.77 (dt,  $J = 7.6, 1.2$  Hz, 1H), 3.95 (br s, 2H), 3.18 (s, 3H); <sup>13</sup>C NMR (100.6 MHz, CDCl<sub>3</sub>)  $\delta$  154.8 (d,  $J = 245.8$  Hz, C), 142.1 (C), 138.4 (d,  $J = 9.2$  Hz, C), 136.5 (C), 126.1 (CH), 124.6 (CH), 124.2 (d,  $J = 3.0$  Hz, CH), 121.6 (d,  $J = 7.6$  Hz, CH), 119.6 (d,  $J = 3.0$  Hz, CH), 118.7 (CH), 116.2 (d,  $J = 21.4$  Hz, CH), 115.7 (CH), 39.9 (d,  $J = 2.9$  Hz, CH<sub>3</sub>); EI-LRMS  $m/z$  216 (M<sup>+</sup>, 100); HRMS calcd for C<sub>13</sub>H<sub>13</sub>FN<sub>2</sub>, 216.1063; found, 216.1057.

***N*-(3-Dimethylaminopropyl)-*N*-(2-fluorophenyl)benzene-1,2-diamine (**2b**):** KBH<sub>4</sub> (3.78 g, 70 mmol) was added to a solution of **1b** (3.17 g, 10 mmol) and CuCl (2.97 g, 30 mmol) in MeOH (100 mL). Workup as above gave the title compound (2.64 g, 92%) as a white solid: mp 106-108 °C; <sup>1</sup>H NMR (400 MHz, CDCl<sub>3</sub>)  $\delta$  7.10-6.86 (m, 5H), 6.80-6.72 (m, 3H), 3.82 (br s, 2H), 3.58 (t,  $J = 6.8$  Hz, 2H), 2.92-2.84 (m, 2H), 2.48 (s, 6H), 2.05-1.95 (m, 2H); <sup>13</sup>C NMR (100.6 MHz, CDCl<sub>3</sub>)  $\delta$  155.3 (d,  $J = 245.8$  Hz, C), 142.9 (C), 137.0 (d,  $J = 7.6$  Hz, C), 132.3 (C), 126.5 (CH), 125.9 (CH), 124.4 (d,  $J = 3.1$  Hz, CH), 122.4 (d,  $J = 7.6$  Hz, CH), 121.6 (d,  $J = 3.0$  Hz, CH), 118.6 (CH), 116.5 (d,  $J = 19.8$  Hz, CH),

116.1 (CH), 62.0 (CH<sub>2</sub>), 51.1 (CH<sub>2</sub>), 50.5 (d,  $J = 3.1$  Hz, CH<sub>2</sub>), 22.8 (CH<sub>3</sub>); EI-LRMS  $m/z$  287 ( $M^+$ , 6), 58 (100); HRMS calcd for C<sub>17</sub>H<sub>22</sub>FN<sub>3</sub>, 287.1798; found, 287.1794.

**Typical Procedure for the Synthesis of 2-Fluorophenyl 2-Nitrophenyl Ether 7a and Thioether 7b:** 2-Fluorophenol or 2-fluorothiophenol (20 mmol) was added dropwise under nitrogen to a solution of 1-chloro-2-nitrobenzene (4.73 g, 30 mmol) and solid copper oxide (I) (4.29 g, 30 mmol) in pyridine (50 mL) at room temperature. The resulting mixture was heated at reflux for 12 h, cooled to room temperature, and treated with HCl (1 M). The mixture was extracted with Et<sub>2</sub>O (3 x 50 mL), and the combined organic layers were washed with saturated Na<sub>2</sub>CO<sub>3</sub> aqueous solution and dried over anhydrous Na<sub>2</sub>SO<sub>4</sub>. The solvents were removed under reduced pressure and the residue was purified by silica gel column chromatography (hexane/EtOAc) to provide the corresponding ether or thioether:

**2-Fluorophenyl 2-nitrophenyl ether (7a):**<sup>3</sup> Prepared from 2-fluorophenol (2.24 g, 20 mmol), Cu<sub>2</sub>O (4.29 g, 30 mmol) and 1-chloro-2-nitrobenzene (4.73 g, 30 mmol) in pyridine (50 mL) according to the above procedure to give the title compound (3.45 g, 74%) as a yellow oil:  $R_f$  0.13 (hexane/EtOAc, 25/1); <sup>1</sup>H NMR (200 MHz, CDCl<sub>3</sub>)  $\delta$  7.95-7.87 (m, 1H), 7.51-7.40 (m, 1H), 7.22-7.03 (m, 5H), 6.92-6.84 (m, 1H); <sup>13</sup>C NMR (50.3 MHz, CDCl<sub>3</sub>)  $\delta$  153.7 (d,  $J = 250.5$  Hz, C), 150.4 (C), 141.9 (d,  $J = 12.0$  Hz, C), 140.0 (C), 134.2 (CH), 126.1 (d,  $J = 6.9$  Hz, CH), 125.6 (CH), 124.9 (d,  $J = 3.8$  Hz, CH), 123.0 (CH), 121.9 (CH), 118.2 (CH), 117.1 (d,  $J = 17.7$  Hz, CH); EI-LRMS  $m/z$  233 ( $M^+$ , 21), 122 (100); HRMS calcd for C<sub>12</sub>H<sub>8</sub>FNO<sub>3</sub>, 233.0488; found, 233.0480.

**2-Fluorophenyl 2-nitrophenyl thioether (7b):** Prepared from 2-fluorothiophenol (2.56 g, 20 mmol), Cu<sub>2</sub>O (4.29 g, 30 mmol) and 1-chloro-2-nitrobenzene (4.73 g, 30 mmol) in pyridine (50 mL) according to the above procedure to give the title compound (3.89 g, 78%) as a yellow solid: mp 80-82 °C (lit.<sup>4</sup> mp 75 °C); <sup>1</sup>H NMR (200 MHz, CDCl<sub>3</sub>)  $\delta$  8.23 (d,  $J = 8.2$  Hz, 1H), 7.66-7.14 (m, 6H), 6.82 (dd,  $J = 7.8, 1.3$  Hz, 1H); <sup>13</sup>C NMR (50.3 MHz, CDCl<sub>3</sub>)  $\delta$  163.0 (d,  $J = 251.3$  Hz, C), 144.9 (C), 137.7 (CH), 137.3 (C), 133.6 (CH), 132.8 (d,  $J = 8.7$  Hz, CH), 127.5 (CH), 125.8 (CH), 125.5 (d,  $J = 3.8$  Hz, CH), 125.2 (CH),

117.9 (d,  $J = 19.4$  Hz, C), 116.7 (d,  $J = 22.9$  Hz, CH); EI-LRMS  $m/z$  249 ( $M^+$ , 33), 185 (100); HRMS calcd for  $C_{12}H_8FNO_2S$ , 249.0260; found, 249.0269.

**Typical Procedure for the Synthesis of 2-Aminophenyl 2-Fluorophenyl Ether 8a and Thioether**

**8b:** To a solution of the corresponding aromatic nitro compound **7a,b** (10 mmol) in EtOH (25 mL) and HCl conc. (4 mL) iron powder (1.68 g, 30 mmol) was added. The mixture was refluxed for 6 h and then, it was filtered through Celite. The filter pad was washed with hot EtOAc (3 x 30 mL), the filtrate was concentrated and the residue was partitioned between EtOAc and brine. The organic layer was dried over anhydrous  $Na_2SO_4$ , the solvents were removed under reduced pressure and the residue was purified by silica gel column chromatography (hexane/EtOAc) to provide the corresponding compound:

**2-(2-Fluorophenoxy)aniline (8a):**<sup>5</sup> Fe powder (1.68 g, 30 mmol) was added to a solution of **7a** (2.33 g, 10 mmol) in EtOH (25 mL) and HCl (4 mL). Workup as above gave the title compound (1.87 g, 92%) as a yellow oil:  $R_f$  0.20 (hexane/EtOAc, 20/1);  $^1H$  NMR (200 MHz,  $CDCl_3$ )  $\delta$  7.32-6.61 (m, 8H), 3.95 (br s, 2H);  $^{13}C$  NMR (50.3 MHz,  $CDCl_3$ )  $\delta$  153.2 (d,  $J = 248.3$  Hz, C), 144.2 (d,  $J = 11.5$  Hz, C), 143.0 (C), 137.9 (C), 124.5 (CH), 124.3 (d,  $J = 3.8$  Hz, CH), 123.5 (d,  $J = 6.9$  Hz), 119.4 (d,  $J = 0.8$  Hz, CH), 118.1 (CH), 116.5 (d,  $J = 18.2$  Hz, CH), 116.1 (CH); EI-LRMS  $m/z$  203 ( $M^+$ , 100); HRMS calcd for  $C_{12}H_{10}FNO$ , 203.0746; found, 203.0751.

**2-(2-Fluorophenylthio)aniline (8b):** Fe powder (1.68 g, 30 mmol) was added to a solution of **7b** (2.49 g, 10 mmol) in EtOH (25 mL) and HCl (4 mL). Workup as above gave the title compound (1.97 g, 90%) as a yellow solid: mp 38-40 °C (lit.<sup>4</sup> mp 42-44 °C);  $^1H$  NMR (200 MHz,  $CDCl_3$ )  $\delta$  7.51 (d,  $J = 7.4$  Hz, 1H), 7.34-7.24 (m, 1H), 7.21-6.75 (m, 6H), 4.35 (br s, 2H);  $^{13}C$  NMR (50.3 MHz,  $CDCl_3$ )  $\delta$  159.3 (d,  $J = 243.3$  Hz, C), 149.0 (C), 137.5 (CH), 131.3 (CH), 128.1 (d,  $J = 2.3$  Hz, CH), 126.8 (d,  $J = 7.6$  Hz, CH), 124.5 (d,  $J = 3.0$  Hz, CH), 123.8 (d,  $J = 17.1$  Hz, C), 118.7 (CH), 115.4 (CH), 115.2 (d,  $J = 21.3$  Hz, CH), 112.1 (C); EI-LRMS  $m/z$  219 ( $M^+$ , 100); HRMS calcd for  $C_{12}H_{10}FNS$ , 219.0518; found, 219.0528.

**Typical Procedure for the Preparation of 2-Fluorophenyl 2-Iodophenyl Amines 3a-b, Ether 9a, and Thioether 9b:**<sup>6</sup> A cooled solution of NaNO<sub>2</sub> (0.61 g, 8.8 mmol) in H<sub>2</sub>O (2 mL) was slowly added to a stirred solution of the corresponding aromatic amino compound **2** or **8** (8 mmol) in H<sub>2</sub>O (8 mL) and H<sub>2</sub>SO<sub>4</sub> (conc., 1.2 mL) cooled in an ice bath. After the addition, the mixture was stirred at this temperature for 30 min and then it was slowly poured into an ice-cold solution of KI (1.74 g, 10.5 mmol) in H<sub>2</sub>O (4 mL). After a few minutes, copper powder (0.008 g, 0.12 mmol) was added, and the reaction mixture was refluxed for 30 min. The mixture was allowed to cool to room temperature, extracted with CH<sub>2</sub>Cl<sub>2</sub> (4 x 30 mL). The combined organic layers were washed with Na<sub>2</sub>S<sub>2</sub>O<sub>3</sub> (20% aq., 10 mL), dried over anhydrous Na<sub>2</sub>SO<sub>4</sub>, and filtered. The solvents were removed under reduced pressure and the residue was purified by silica gel column chromatography (hexane/EtOAc) to provide the corresponding products:

***N*-(2-Fluorophenyl)-*N*-(2-iodophenyl)methylamine (3a):** A solution of **2a** (1.73 g, 8 mmol) in H<sub>2</sub>O (8 mL) and H<sub>2</sub>SO<sub>4</sub> (conc., 1.2 mL) was treated with NaNO<sub>2</sub> (0.61 g, 8.8 mmol) and KI (1.74 g, 10.5 mmol). Workup as described above yielded **3a** (1.57 g, 60%) as a colorless oil: *R<sub>f</sub>* 0.30 (hexane); <sup>1</sup>H NMR (400 MHz, CDCl<sub>3</sub>) δ 7.93 (dd, *J* = 7.6, 1.6 Hz, 1H), 7.35 (dt, *J* = 8.0, 1.6 Hz, 1H), 7.16 (dd, *J* = 8.0, 1.6 Hz, 1H), 7.11-6.89 (m, 5H), 3.26 (s, 3H); <sup>13</sup>C NMR (100.6 MHz, CDCl<sub>3</sub>) δ 155.0 (d, *J* = 248.3 Hz, C), 151.6 (C), 140.1 (CH), 137.8 (d, *J* = 9.1 Hz, C), 129.2 (CH), 126.5 (CH), 125.4 (d, *J* = 1.5 Hz, CH), 124.2 (d, *J* = 3.5 Hz, CH), 121.8 (d, *J* = 7.8 Hz, CH), 120.0 (d, *J* = 2.3 Hz, CH), 116.3 (d, *J* = 19.8 Hz, CH), 98.0 (C), 41.1 (d, *J* = 2.3 Hz, CH<sub>3</sub>); EI-LRMS *m/z* 327 (M<sup>+</sup>, 50), 185 (100); HRMS calcd for C<sub>13</sub>H<sub>11</sub>FIN, 326.9920; found, 326.9931. Anal. Calcd for C<sub>13</sub>H<sub>11</sub>FIN (327.1): C, 47.73; H, 3.39; N, 4.28. Found: C, 47.86; H, 3.38; N, 4.29.

***N*-(3-Dimethylaminopropyl)-*N*-(2-fluorophenyl)-2-iodoaniline (3b):** A solution of **2b** (2.30 g, 8 mmol) in H<sub>2</sub>O (8 mL) and H<sub>2</sub>SO<sub>4</sub> (conc., 1.2 mL) was treated with NaNO<sub>2</sub> (0.61 g, 8.8 mmol) and KI (1.74 g, 10.5 mmol). Workup as described above yielded **3b** (1.62 g, 51%) as a colorless oil: *R<sub>f</sub>* 0.40 (AcOEt/Et<sub>2</sub>NH, 20/1); <sup>1</sup>H NMR (400 MHz, CDCl<sub>3</sub>) δ 7.85 (dd, *J* = 8.0, 1.6 Hz, 1H), 7.31 (dt, *J* = 7.6,

1.6 Hz, 1H), 7.18 (dd,  $J = 7.6, 1.2$  Hz, 1H), 7.04-6.92 (m, 2H), 6.90-6.83 (m, 2H), 6.73-6.68 (m, 1H), 3.65-3.60 (m, 2H), 2.34 (t,  $J = 7.2$  Hz, 2H), 2.19 (s, 6H), 1.84-1.79 (m, 2H);  $^{13}\text{C}$  NMR (100.6 MHz,  $\text{CDCl}_3$ )  $\delta$  155.5 (d,  $J = 245.7$  Hz, C), 149.6 (C), 140.4 (CH), 137.0 (d,  $J = 7.7$  Hz, C), 128.9 (CH), 126.7 (CH), 126.5 (CH), 124.1 (d,  $J = 4.6$  Hz, CH), 121.9 (d,  $J = 6.1$  Hz, CH), 121.8 (d,  $J = 3.1$  Hz, CH), 116.5 (d,  $J = 19.8$  Hz, CH), 99.2 (C), 57.1 ( $\text{CH}_2$ ), 51.6 (d,  $J = 3.0$  Hz,  $\text{CH}_2$ ), 45.5 ( $\text{CH}_2$ ), 26.2 ( $\text{CH}_3$ ); EI-LRMS  $m/z$  398 ( $\text{M}^+$ , 0.1), 58 (100). Anal. Calcd for  $\text{C}_{17}\text{H}_{20}\text{FIN}_2$  (398.3): C, 51.27; H, 5.06; N, 7.03. Found: C, 51.35; H, 5.08; N, 7.05.

**2-Fluorophenyl 2-iodophenyl ether (9a):** A solution of **8a** (1.63 g, 8 mmol) in  $\text{H}_2\text{O}$  (8 mL) and  $\text{H}_2\text{SO}_4$  (conc., 1.2 mL) was treated with  $\text{NaNO}_2$  (0.61 g, 8.8 mmol) and KI (1.74 g, 10.5 mmol). Workup as described above yielded **9a** (1.88 g, 75%) as a colorless oil:  $R_f$  0.27 (hexane/EtOAc, 30/1);  $^1\text{H}$  NMR (400 MHz,  $\text{CDCl}_3$ )  $\delta$  7.86 (dd,  $J = 7.6, 1.2$  Hz, 1H), 7.30-7.07 (m, 4H), 6.99 (dt,  $J = 8.0, 2.0$  Hz, 1H), 6.86 (dt,  $J = 7.6, 1.6$  Hz, 1H), 6.78 (d,  $J = 8.0$  Hz, 1H);  $^{13}\text{C}$  NMR (50.3 MHz,  $\text{CDCl}_3$ )  $\delta$  156.3 (C), 153.7 (d,  $J = 249.6$  Hz, C), 143.3 (d,  $J = 11.4$  Hz, C), 139.7 (CH), 129.4 (CH), 125.0 (CH), 124.9 (d,  $J = 6.6$  Hz, CH), 124.6 (d,  $J = 3.8$  Hz, CH), 121.1 (CH), 117.05 (CH), 117.01 (d,  $J = 18.1$  Hz, CH), 87.1 (C); EI-LRMS  $m/z$  314 ( $\text{M}^+$ , 100); HRMS calcd for  $\text{C}_{12}\text{H}_8\text{FIO}$ , 313.9604; found, 313.9597. Anal. Calcd for  $\text{C}_{12}\text{H}_8\text{FIO}$  (314.1): C, 45.89; H, 2.57. Found: C, 46.02; H, 2.58.

**2-Fluorophenyl 2-iodophenyl thioether (9b):** A solution of **8b** (1.75 g, 8 mmol) in  $\text{H}_2\text{O}$  (8 mL) and  $\text{H}_2\text{SO}_4$  (conc., 1.2 mL) was treated with  $\text{NaNO}_2$  (0.61 g, 8.8 mmol) and KI (1.74 g, 10.5 mmol). Workup as described above yielded **9b** (1.90 g, 72%) as a white solid: mp 48-50  $^\circ\text{C}$ ;  $^1\text{H}$  NMR (200 MHz,  $\text{CDCl}_3$ )  $\delta$  7.84 (d,  $J = 7.6$  Hz, 1H), 7.44-7.34 (m, 2H), 7.26-7.12 (m, 3H), 6.99-6.85 (m, 2H);  $^{13}\text{C}$  NMR (50.3 MHz,  $\text{CDCl}_3$ )  $\delta$  161.6 (d,  $J = 248.7$  Hz, C), 140.1 (C), 139.4 (CH), 134.9 (CH), 130.7 (d,  $J = 7.8$  Hz, CH), 128.8 (CH), 128.7 (CH), 127.5 (CH), 125.0 (d,  $J = 3.9$  Hz, CH), 120.7 (d,  $J = 17.4$  Hz, C), 116.1 (d,  $J = 21.9$  Hz, CH), 98.9 (C); EI-LRMS  $m/z$  330 ( $\text{M}^+$ , 14), 329 (100); HRMS calcd for  $\text{C}_{12}\text{H}_8\text{FIS}$ , 329.9375; found, 329.9370. Anal. Calcd for  $\text{C}_{12}\text{H}_8\text{FIS}$  (330.2): C, 43.65; H, 2.44. Found: C, 43.74; H, 2.43.



**Synthesis of *N*-(2-Bromophenyl)-*N*-(2-fluorophenyl)methylamine (3c):** Under nitrogen atmosphere an oven-dried Schlenk flask was charged with Cs<sub>2</sub>CO<sub>3</sub> (3.42 g, 10.5 mmol), Pd<sub>2</sub>(dba)<sub>3</sub> (0.207 g, 0.225 mmol) and BINAP (0.210 g, 0.34 mmol). 2-Bromoaniline (1.55 g, 9 mmol), 1-bromo-2-fluorobenzene (1.32 g, 7.5 mmol) and toluene (30 mL) were added, and the mixture was heated to 100 °C with stirring for 48 h. The mixture was cooled to room temperature, diluted with Et<sub>2</sub>O, filtered and concentrated under reduced pressure. The crude product was then purified by column chromatography (hexane) giving rise to ***N*-(2-bromophenyl)-2-fluoroaniline** (0.76 g, 38%) as a colorless oil: *R<sub>f</sub>* 0.43 (hexane/EtOAc, 50/1); <sup>1</sup>H NMR (300 MHz, CDCl<sub>3</sub>) δ 7.60 (d, *J* = 7.7 Hz, 1H), 7.37 (td, *J* = 8.3, 1.9 Hz, 1H), 7.31-7.07 (m, 4H), 7.06-6.96 (m, 1H), 6.88-6.79 (m, 1H), 6.18 (br s, 1H); <sup>13</sup>C NMR (75.4 MHz, CDCl<sub>3</sub>) δ 154.3 (d, *J* = 240.8 Hz, C), 140.5 (C), 133.1 (CH), 130.1 (d, *J* = 11.3 Hz, C), 128.2 (CH), 124.4 (d, *J* = 4.1 Hz, CH), 122.7 (d, *J* = 7.3 Hz, CH), 121.8 (CH), 120.1 (d, *J* = 1.7 Hz, CH), 116.5 (CH), 116.1 (d, *J* = 19.3 Hz, CH), 113.1 (C); EI-LRMS *m/z* 267 (M<sup>+</sup>+2, 62), 265 (M<sup>+</sup>, 64), 185 (100); HRMS calcd for C<sub>12</sub>H<sub>9</sub>BrFN, 264.9902; found, 264.9895. A solution of *N*-(2-bromophenyl)-2-fluoroaniline (0.67 g, 2.5 mmol) in DMF (4 mL) was treated with NaH (0.09 g, 3.75 mmol) at 0 °C for 30 min. Then, methyl iodide (0.462 g, 3.25 mmol) in DMF (2 mL) was added at 0 °C and the mixture was stirred at room temperature for 1 h. The mixture was diluted with H<sub>2</sub>O, extracted with CH<sub>2</sub>Cl<sub>2</sub> (3 x 20 mL), dried over Na<sub>2</sub>SO<sub>4</sub> anhydrous, filtered and concentrated under reduced pressure. The crude product was then purified by column chromatography (hexane) yielding **3c** (0.66 g, 94%) as a colorless oil: *R<sub>f</sub>* 0.28 (hexane); <sup>1</sup>H NMR (300 MHz, CDCl<sub>3</sub>) δ 7.61 (dd, *J* = 8.0, 1.6 Hz, 1H), 7.29 (td, *J* = 7.7, 1.4 Hz, 1H), 7.17 (dd, *J* = 8.0, 1.6 Hz, 1H), 7.09-6.87 (m, 5H), 3.27 (s, 3H); <sup>13</sup>C NMR (75.4 MHz, CDCl<sub>3</sub>) δ 155.0 (d, *J* = 247.1 Hz, C), 148.4 (C), 137.7 (d, *J* = 9.1 Hz, C), 133.9 (CH), 128.2 (CH), 125.8 (CH), 125.6 (d, *J* = 1.9 Hz, CH), 124.2 (d, *J* = 3.8 Hz, CH), 122.1 (d, *J* = 7.6 Hz, CH), 120.7 (C), 120.5 (d, *J* = 2.9 Hz, CH), 116.3 (d, *J* = 20.0 Hz, CH), 40.8 (d, *J* = 2.0 Hz, CH<sub>3</sub>); EI-LRMS *m/z* 281 (M<sup>+</sup>+2, 61), 279 (M<sup>+</sup>, 62), 185 (100); HRMS calcd for C<sub>13</sub>H<sub>11</sub>BrFN, 279.0059; found, 279.0065. Anal. Calcd for C<sub>11</sub>H<sub>11</sub>BrFN (280.1): C, 55.74; H, 3.96; N, 5.00. Found: C, 55.84; H, 3.95; N, 4.98.

**General Procedure for the Synthesis of 4-Functionalized Carbazoles **4**, 1-Functionalized Dibenzofurans **10** and 1-Functionalized Dibenzothiophenes **11**:** *t*-BuLi (2.2 mL of a 1.5 M solution in pentane, 3.3 mmol) was added to a solution of the corresponding 2-fluorophenyl 2-halophenyl derivative **3a-c** or **9a,b** (1 mmol) in THF (8 mL) at  $-78^{\circ}\text{C}$ . The resulting solution was stirred for 20 min at this temperature and then, the reaction mixture was allowed to warm to  $0^{\circ}\text{C}$  and stirred for 30 min. After cooling to  $-78^{\circ}\text{C}$ , the corresponding electrophile (1.2 mmol) was added dropwise and stirring continued at low temperature for further 30 min. The reaction mixture was then allowed to warm to room temperature, quenched with water and extracted with EtOAc (3 x 20 mL). The combined organic layers were dried ( $\text{Na}_2\text{SO}_4$ ), and evaporated under reduced pressure. The crude product was purified by column chromatography (eluent: hexane/EtOAc) on silica gel to afford the corresponding compounds **4**, **10**, and **11**.

**9-Methyl-9H-carbazole (**4a**):**<sup>3</sup> Treatment of **3a** (0.327 g, 1 mmol) with *t*-BuLi (2.2 mL, 3.3 mmol) according to the general procedure, using MeOH (excess) as electrophile and workup as described above yielded **4a** (0.143 g, 79%) as a white solid: mp  $87-89^{\circ}\text{C}$  (lit.<sup>7</sup> mp  $87-88^{\circ}\text{C}$ );  $^1\text{H}$  NMR (400 MHz,  $\text{CDCl}_3$ )  $\delta$  8.17 (d,  $J = 7.6$  Hz, 2H), 7.54 (dd,  $J = 8.0, 7.6$  Hz, 2H), 7.43 (d,  $J = 8.0$  Hz, 2H), 7.31 (t,  $J = 7.6$  Hz, 2H), 3.85 (s, 3H);  $^{13}\text{C}$  NMR (100.6 MHz,  $\text{CDCl}_3$ )  $\delta$  140.8 (C), 125.6 (CH), 122.6 (C), 120.2 (CH), 118.7 (CH), 108.3 (CH), 28.9 ( $\text{CH}_3$ ); EI-LRMS  $m/z$  181 ( $\text{M}^+$ , 100); IR (KBr) 2928, 1588, 1464  $\text{cm}^{-1}$ . Anal. Calcd for  $\text{C}_{13}\text{H}_{11}\text{N}$  (181.2): C, 86.15; H, 6.12; N, 7.73. Found: C, 86.10; H, 6.11; N, 7.70.

**9-Methyl-4-phenylthio-9H-carbazole (**4b**):** Treatment of **3a** (0.327 g, 1 mmol) with *t*-BuLi (2.2 mL, 3.3 mmol) according to the general procedure, using diphenyl disulfide (0.262 g, 1.2 mmol) as electrophile and workup as described above yielded **4b** (0.185 g, 64%) as a white solid: mp  $108-110^{\circ}\text{C}$ ;  $^1\text{H}$  NMR (400 MHz,  $\text{CDCl}_3$ )  $\delta$  8.62 (d,  $J = 8.0$  Hz, 1H), 7.50-7.18 (m, 11H), 3.85 (s, 3H);  $^{13}\text{C}$  NMR (100.6 MHz,  $\text{CDCl}_3$ )  $\delta$  141.4 (C), 141.0 (C), 135.7 (C), 129.8 (CH), 129.1 (CH), 128.8 (C), 126.4 (CH), 125.8 (CH), 125.6 (CH), 123.8 (C), 122.7 (C), 122.3 (CH), 119.1 (CH), 108.1 (CH), 107.9 (CH), 29.1

(CH<sub>3</sub>); EI-LRMS  $m/z$  289 (M<sup>+</sup>, 100); IR (KBr) 2788, 1580, 1417 cm<sup>-1</sup>. Anal. Calcd for C<sub>19</sub>H<sub>15</sub>NS (289.4): C, 78.86; H, 5.22; N, 4.84. Found: C, 78.94; H, 5.24; N, 4.85.

**4-Bromo-9-methyl-9H-carbazole (4c):** Treatment of **3a** (0.327 g, 1 mmol) with *t*-BuLi (2.2 mL, 3.3 mmol) according to the general procedure, using 1,2-dibromoethane (0.225 g, 1.2 mmol) as electrophile and workup as described above yielded **4c** (0.182 g, 70%) as a white solid: mp 97-99 °C; <sup>1</sup>H NMR (400 MHz, CDCl<sub>3</sub>)  $\delta$  8.79 (d,  $J$  = 8.0 Hz, 1H), 7.56-7.52 (m, 1H), 7.41-7.29 (m, 5H), 3.80 (s, 3H); <sup>13</sup>C NMR (100.6 MHz, CDCl<sub>3</sub>)  $\delta$  141.9 (C), 140.9 (C), 126.2 (CH), 126.0 (CH), 122.9 (CH), 122.5 (CH), 122.2 (C), 121.3 (C), 118.9 (CH), 116.6 (C), 108.2 (CH), 107.2 (CH), 29.0 (CH<sub>3</sub>); EI-LRMS  $m/z$  261 (M<sup>+</sup>+2, 100), 259 (M<sup>+</sup>, 100); IR (KBr) 2924, 1600, 1464 cm<sup>-1</sup>; HRMS calcd for C<sub>13</sub>H<sub>10</sub>BrN, 258.9997; found, 258.9989. Anal. Calcd for C<sub>13</sub>H<sub>10</sub>BrN (260.1): C, 60.02; H, 3.87; N, 5.38. Found: C, 60.13; H, 3.88; N, 5.36.

**N-Phenyl-(9-methyl-9H-carbazole)-1-carboxamide (4d):** Treatment of **3c** (0.280 g, 1 mmol) with *t*-BuLi (2.2 mL, 3.3 mmol) according to the general procedure, using phenyl isocyanate (0.143 g, 1.2 mmol) as electrophile and workup as described above yielded **4d** (0.213 g, 71%) as a white solid: mp 153-155 °C; <sup>1</sup>H NMR (300 MHz, CDCl<sub>3</sub>)  $\delta$  8.33 (d,  $J$  = 8.0 Hz, 1H), 8.03 (br s, 1H), 7.73 (d,  $J$  = 8.0 Hz, 2H), 7.54-7.34 (m, 7H), 7.19 (t,  $J$  = 7.6 Hz, 2H), 3.82 (s, 3H); <sup>13</sup>C NMR (75.4 MHz, CDCl<sub>3</sub>)  $\delta$  167.7 (C), 141.2 (C), 138.0 (C), 130.6 (C), 129.1 (CH), 128.5 (C), 126.3 (CH), 125.1 (CH), 124.4 (CH), 123.4 (CH), 120.8 (C), 119.9 (CH), 119.4 (CH), 119.0 (C), 118.2 (CH), 110.8 (CH), 108.4 (CH), 29.0 (CH<sub>3</sub>); EI-LRMS  $m/z$  300 (M<sup>+</sup>, 53), 208 (100); IR (KBr) 3430, 2930, 1598, 1538, 1439 cm<sup>-1</sup>; HRMS calcd for C<sub>20</sub>H<sub>16</sub>N<sub>2</sub>O, 300.1263; found, 300.1269. Anal. Calcd for C<sub>20</sub>H<sub>16</sub>N<sub>2</sub>O (300.4): C, 79.98; H, 5.37; N, 9.33. Found: C, 80.12; H, 5.38; N, 9.30.

**4-(1-Ethyl-1-hydroxyethyl)-9-methyl-9H-carbazole (4e):** Treatment of **3c** (0.280 g, 1 mmol) with *t*-BuLi (2.2 mL, 3.3 mmol) according to the general procedure, using 3-pentanone (0.103 g, 1.2 mmol) as electrophile and workup as described above yielded **4e** (0.198 g, 74%) as a white solid: mp 101-103 °C; <sup>1</sup>H NMR (400 MHz, CDCl<sub>3</sub>)  $\delta$  8.98 (br s, 1H), 7.53 (t,  $J$  = 8.1 Hz, 1H), 7.49-7.42 (m, 2H), 7.37 (dd,

$J = 8.1, 0.9$  Hz, 1H), 7.31 (t,  $J = 8.1$  Hz, 1H), 7.26-7.18 (br s, 1H), 3.84 (s, 3H), 2.41-2.07 (m, 5H), 0.94 (t,  $J = 7.5$  Hz, 6H);  $^{13}\text{C}$  NMR (100.6 MHz,  $\text{CDCl}_3$ )  $\delta$  142.3 (C), 140.9 (C), 127.0 (CH), 125.1 (CH), 124.6 (CH), 121.7 (C), 118.4 (CH), 117.6 (CH), 107.9 (CH), 107.7 (CH), 78.1 (C), 30.7 ( $\text{CH}_2$ ), 28.8 ( $\text{CH}_3$ ), 8.3 ( $\text{CH}_3$ ); EI-LRMS  $m/z$  267 ( $\text{M}^+$ , 80), 182 (100); IR (KBr) 3534, 2981, 2960, 2935, 1475, 1325, 720  $\text{cm}^{-1}$ ; HRMS calcd for  $\text{C}_{18}\text{H}_{21}\text{NO}$ , 267.1623; found, 267.1618. Anal. Calcd for  $\text{C}_{18}\text{H}_{21}\text{NO}$  (267.4): C, 80.86; H, 7.92; N, 5.24. Found: C, 80.75; H, 7.95; N, 5.22.

**9-(3-Dimethylaminopropyl)-9H-carbazole (4f):** Treatment of **3b** (0.398 g, 1 mmol) with *t*-BuLi (2.2 mL, 3.3 mmol) according to the general procedure, using MeOH (excess) as electrophile and workup as described above yielded **4f** (0.177 g, 70%) as a white solid: mp 175-177 °C (lit.<sup>8</sup> bp 165-168 °C / 0.58 torr);  $^1\text{H}$  NMR (400 MHz,  $\text{CDCl}_3$ )  $\delta$  8.11 (d,  $J = 8.0$  Hz, 2H), 7.49-7.46 (m, 4H), 7.26-7.22 (m, 2H), 4.39 (t,  $J = 7.0$  Hz, 2H), 2.29 (t,  $J = 6.8$  Hz, 2H), 2.23 (s, 6H), 2.06-2.01 (m, 2H);  $^{13}\text{C}$  NMR (100.6 MHz,  $\text{CDCl}_3$ )  $\delta$  140.4 (C), 125.5 (CH), 122.7 (C), 120.2 (CH), 118.6 (CH), 108.6 (CH), 56.5 ( $\text{CH}_2$ ), 45.4 ( $\text{CH}_2$ ), 40.6 ( $\text{CH}_2$ ), 26.9 ( $\text{CH}_3$ ); EI-LRMS  $m/z$  252 ( $\text{M}^+$ , 7), 58 (100); IR (KBr) 2947, 1596, 1460  $\text{cm}^{-1}$ . Anal. Calcd for  $\text{C}_{17}\text{H}_{20}\text{N}_2$  (252.4): C, 80.91; H, 7.99; N, 11.10. Found: C, 80.75; H, 8.02; N, 11.06.

**9-(3-Dimethylaminopropyl)-4-tributylstannyl-9H-carbazole (4g):** Treatment of **3b** (0.398 g, 1 mmol) with *t*-BuLi (2.2 mL, 3.3 mmol) according to the general procedure, using tri-*n*-butyltin chloride (0.391 g, 1.2 mmol) as electrophile and workup as described above yielded **4g** (0.330 g, 61%) as a brown oil:  $R_f$  0.33 (EtOAc/Et<sub>2</sub>NH, 20/1);  $^1\text{H}$  NMR (400 MHz,  $\text{CDCl}_3$ )  $\delta$  8.11 (d,  $J = 8.0$  Hz, 1H), 7.54-7.43 (m, 4H), 7.37 (dd,  $J = 6.4, 2.0$  Hz, 1H), 7.28-7.23 (m, 1H), 4.41 (t,  $J = 7.0$  Hz, 2H), 2.33 (t,  $J = 6.8$  Hz, 2H), 2.26 (s, 6H), 2.09-2.01 (m, 2H), 1.68-1.59 (m, 6H), 1.43-1.25 (m, 12H), 0.90 (t,  $J = 7.4$  Hz, 9H);  $^{13}\text{C}$  NMR (100.6 MHz,  $\text{CDCl}_3$ )  $\delta$  140.4 (C), 139.7 (C), 134.3 (C), 128.7 (C), 127.3 (CH), 125.0 (CH), 124.7 (CH), 124.4 (C), 120.5 (CH), 118.2 (CH), 108.8 (CH), 108.6 (CH), 56.6 ( $\text{CH}_2$ ), 45.4 ( $\text{CH}_2$ ), 40.4 ( $\text{CH}_2$ ), 29.1 ( $\text{CH}_2$ ), 27.3 ( $\text{CH}_2$ ), 26.8 ( $\text{CH}_3$ ), 13.6 ( $\text{CH}_3$ ), 10.0 ( $\text{CH}_2$ ); EI-LRMS  $m/z$  484 ( $\text{M}^+ - \text{C}_4\text{H}_9$ , 0.1), 58 (100); IR (KBr) 2928, 1580, 1460  $\text{cm}^{-1}$ . Anal. Calcd for  $\text{C}_{29}\text{H}_{46}\text{N}_2\text{Sn}$  (541.4): C, 64.34; H, 8.56; N, 5.17. Found: C, 64.48; H, 8.59; N, 5.15.

**9-(3-Dimethylaminopropyl)-4-[1-hydroxy-1-(4-methylphenyl)methyl]-9H-carbazole (4h):**

Treatment of **3b** (0.398 g, 1 mmol) with *t*-BuLi (2.2 mL, 3.3 mmol) according to the general procedure, using 4-methylbenzaldehyde (0.144 g, 1.2 mmol) as electrophile and workup as described above yielded **4h** (0.216 g, 58%) as a white solid: mp 183-185 °C; <sup>1</sup>H NMR (400 MHz, DMSO-*d*<sub>6</sub>) δ 8.11 (d, *J* = 7.6 Hz, 1H), 7.58 (d, *J* = 8.0 Hz, 1H), 7.54 (d, *J* = 7.6 Hz, 1H), 7.45 (t, *J* = 8.0 Hz, 1H), 7.42-7.37 (m, 1H), 7.27-7.22 (m, 3H), 7.11-7.06 (m, 3H), 6.49 (d, *J* = 4.6 Hz, 1H), 6.01 (d, *J* = 4.6 Hz, 1H), 4.42 (t, *J* = 6.8 Hz, 2H), 2.23 (s, 3H), 2.20 (t, *J* = 6.8 Hz, 2H), 2.13 (s, 6H), 1.90-1.80 (m, 2H); <sup>13</sup>C NMR (100.6 MHz, DMSO-*d*<sub>6</sub>) δ 141.0 (C), 140.3 (C), 140.1 (C), 139.8 (C), 135.7 (C), 128.6 (CH), 127.0 (CH), 125.2 (CH), 125.1 (CH), 123.8 (CH), 121.4 (C), 119.2 (C), 118.5 (CH), 117.6 (CH), 108.8 (CH), 108.0 (CH), 72.0 (CH), 56.0 (CH<sub>2</sub>), 45.1 (CH<sub>2</sub>), 39.9 (CH<sub>2</sub>), 26.4 (CH<sub>3</sub>), 20.7 (CH<sub>3</sub>); EI-LRMS *m/z* 372 (M<sup>+</sup>, 0.1), 58 (100); IR (KBr) 3421, 2939, 1592, 1464 cm<sup>-1</sup>; HRMS calcd for C<sub>25</sub>H<sub>28</sub>N<sub>2</sub>O, 372.2202; found, 372.2189. Anal. Calcd for C<sub>25</sub>H<sub>28</sub>N<sub>2</sub>O (372.5): C, 80.61; H, 7.58; N, 7.52. Found: C, 80.47; H, 7.61; N, 7.50.

**Ethyl dibenzofuran-1-carboxylate (10a):**<sup>9</sup> Treatment of **9a** (0.314 g, 1 mmol) with *t*-BuLi (2.2 mL, 3.3 mmol) according to the general procedure, using ethyl chloroformate (0.130 g, 1.2 mmol) as electrophile and workup as described above yielded **10a** (0.161 g, 67%) as a white solid: mp 37-39 °C; <sup>1</sup>H NMR (200 MHz, CDCl<sub>3</sub>) δ 8.87 (d, *J* = 8.0 Hz, 1H), 8.02 (dd, *J* = 8.0, 1.0 Hz, 1H), 7.74 (dd, *J* = 8.4, 1.0 Hz, 1H), 7.57-7.30 (m, 4H), 4.53 (q, *J* = 7.0 Hz, 2H), 1.50 (t, *J* = 7.0 Hz, 3H); <sup>13</sup>C NMR (50.3 MHz, CDCl<sub>3</sub>) δ 166.5 (C), 156.7 (C), 156.5 (CH), 128.1 (CH), 126.2 (CH), 126.0 (CH), 125.6 (C), 125.4 (CH), 124.0 (C), 122.8 (C), 122.7 (CH), 115.7 (CH), 111.1 (CH), 61.1 (CH<sub>2</sub>), 14.3 (CH<sub>3</sub>); EI-LRMS *m/z* 240 (M<sup>+</sup>, 85), 195 (100); IR (KBr) 2978, 1720, 1576, 1444, 1281 cm<sup>-1</sup>; HRMS calcd for C<sub>15</sub>H<sub>12</sub>O<sub>3</sub>, 240.0786; found, 240.0790. Anal. Calcd for C<sub>15</sub>H<sub>12</sub>O<sub>3</sub> (240.3): C, 74.99; H, 5.03. Found: C, 75.14; H, 5.01.

**1-Phenylthiodibenzofuran (10b):** Treatment of **9a** (0.314 g, 1 mmol) with *t*-BuLi (2.2 mL, 3.3 mmol) according to the general procedure, using diphenyl disulfide (0.262 g, 1.2 mmol) as electrophile and workup as described above yielded **10b** (0.169 g, 61%) as a colorless oil: *R*<sub>f</sub> 0.30 (hexane/EtOAc,

30/1);  $^1\text{H}$  NMR (400 MHz,  $\text{CDCl}_3$ )  $\delta$  8.39 (d,  $J = 7.6$  Hz, 1H), 7.60 (dd,  $J = 8.4, 0.8$  Hz, 1H), 7.53 (dd,  $J = 8.0, 1.2$  Hz, 1H), 7.49 (ddd,  $J = 8.4, 7.2, 1.2$  Hz, 1H), 7.43-7.23 (m, 8H);  $^{13}\text{C}$  NMR (50.3 MHz,  $\text{CDCl}_3$ )  $\delta$  156.2 (C), 156.0 (C), 134.5 (C), 130.3 (CH), 129.8 (C), 129.3 (CH), 127.2 (CH), 127.1 (CH), 127.0 (CH), 126.3 (CH), 124.4 (C), 123.7 (C), 123.5 (CH), 122.7 (CH), 111.2 (CH), 110.5 (CH); EI-LRMS  $m/z$  276 ( $\text{M}^+$ , 100); IR (KBr) 3056, 1568, 1444, 1200  $\text{cm}^{-1}$ ; HRMS calcd for  $\text{C}_{18}\text{H}_{12}\text{OS}$ , 276.0609; found, 276.0614. Anal. Calcd for  $\text{C}_{18}\text{H}_{12}\text{OS}$  (276.4): C, 78.23; H, 4.38. Found: C, 78.45; H, 4.36.

**1-(4-Methylbenzoyl)dibenzofuran (10c):** Treatment of **9a** (0.314 g, 1 mmol) with *t*-BuLi (2.2 mL, 3.3 mmol) according to the general procedure, using *p*-tolunitrile (0.141 g, 1.2 mmol) as electrophile and workup as described above yielded **10c** (0.178 g, 62%) as a yellow solid: mp 98-100  $^{\circ}\text{C}$ ;  $^1\text{H}$  NMR (400 MHz,  $\text{CDCl}_3$ )  $\delta$  7.76-7.67 (m, 2H), 7.64 (dd,  $J = 8.4, 1.2$  Hz, 1H), 7.59-7.53 (m, 2H), 7.48 (t,  $J = 8.4$  Hz, 1H), 7.39 (ddd,  $J = 8.4, 7.6, 1.2$  Hz, 1H), 7.27-7.10 (m, 4H), 2.38 (s, 3H);  $^{13}\text{C}$  NMR (50.3 MHz,  $\text{CDCl}_3$ )  $\delta$  176.3 (C), 156.2 (C), 156.0 (C), 141.5 (C), 135.3 (C), 134.9 (C), 129.2 (CH), 128.3 (CH), 127.3 (CH), 126.8 (CH), 122.7 (CH), 122.3 (C), 112.3 (CH), 111.4 (CH), 21.4 ( $\text{CH}_3$ ); EI-LRMS  $m/z$  286 ( $\text{M}^+$ , 28), 270 (100); IR (KBr) 3064, 1658, 1594, 1452  $\text{cm}^{-1}$ ; HRMS calcd for  $\text{C}_{20}\text{H}_{14}\text{O}_2$ , 286.0994; found, 286.1011. Anal. Calcd for  $\text{C}_{20}\text{H}_{14}\text{O}_2$  (286.3): C, 83.90; H 4.93. Found: C, 83.78; H, 4.92.

**N-Phenyldibenzofuran-1-carboxamide (10d):** Treatment of **9a** (0.314 g, 1 mmol) with *t*-BuLi (2.2 mL, 3.3 mmol) according to the general procedure, using phenyl isocyanate (0.143 g, 1.2 mmol) as electrophile and workup as described above yielded **10d** (0.181 g, 63%) as a white solid: mp 212-214  $^{\circ}\text{C}$ ;  $^1\text{H}$  NMR (400 MHz,  $\text{DMSO}-d_6$ )  $\delta$  8.17 (d,  $J = 7.6$  Hz, 1H), 7.89 (d,  $J = 8.0$  Hz, 1H), 7.83 (d,  $J = 8.8$  Hz, 2H), 7.73 (d,  $J = 8.0$  Hz, 1H), 7.69 (d,  $J = 7.2$  Hz, 1H), 7.64 (t,  $J = 7.6$  Hz, 1H), 7.54 (t,  $J = 8.0$  Hz, 1H), 7.48-7.32 (m, 3H), 7.25 (t,  $J = 8.0$  Hz, 1H), 7.13 (t,  $J = 7.2$  Hz, 1H);  $^{13}\text{C}$  NMR (50.3 MHz,  $\text{DMSO}-d_6$ )  $\delta$  166.0 (C), 155.9 (C), 155.7 (C), 139.1 (C), 131.4 (C), 128.9 (C), 128.3 (CH), 127.3 (CH), 123.9 (CH), 123.2 (CH), 122.6 (CH), 122.3 (C), 120.1 (CH), 118.2 (CH), 114.0 (CH), 111.7 (CH); EI-LRMS  $m/z$  287 ( $\text{M}^+$ , 27), 195 (100); IR (KBr) 3291, 1658, 1588, 1530, 1436  $\text{cm}^{-1}$ ; HRMS calcd for  $\text{C}_{19}\text{H}_{13}\text{NO}_2$ ,

287.0946; found, 287.0942. Anal. Calcd for  $C_{19}H_{13}NO_2$  (287.3): C, 79.43; H, 4.56; N, 4.88. Found: C, 79.58; H, 4.55; N, 4.89.

**1-(1-Ethyl-1-hydroxyethyl)dibenzofuran (10e):** Treatment of **9a** (0.314 g, 1 mmol) with *t*-BuLi (2.2 mL, 3.3 mmol) according to the general procedure, using 3-pentanone (0.103 g, 1.2 mmol) as electrophile and workup as described above yielded **10e** (0.140 g, 55%) as a colorless oil:  $R_f$  0.30 (hexane/EtOAc, 25/1);  $^1H$  NMR (200 MHz,  $CDCl_3$ )  $\delta$  8.74 (d,  $J$  = 8.0 Hz, 1H), 7.62-7.20 (m, 6H), 2.26-2.08 (m, 5H), 0.89 (t,  $J$  = 7.4 Hz, 6H);  $^{13}C$  NMR (50.3 MHz,  $CDCl_3$ )  $\delta$  157.2 (C), 156.1 (C), 141.5 (C), 129.7 (C), 126.9 (CH), 126.6 (CH), 126.1 (CH), 123.5 (C), 122.1 (CH), 120.7 (CH), 111.1 (CH), 110.7 (CH), 78.0 (C), 31.1 ( $CH_2$ ), 8.1 ( $CH_3$ ); EI-LRMS  $m/z$  254 ( $M^+$ , 8), 57 (100); HRMS calcd for  $C_{17}H_{18}O_2$ , 254.1307; found, 254.1301. Anal. Calcd for  $C_{17}H_{18}O_2$  (254.3): C, 80.28; H, 7.13. Found: C, 80.39; H, 7.16.

**Dibenzothiophene (11a):**<sup>3</sup> Treatment of **9b** (0.330 g, 1 mmol) with *t*-BuLi (2.2 mL, 3.3 mmol) according to the general procedure, using MeOH (excess) as electrophile and workup as described above yielded **11a** (0.146 g, 79%) as a white solid: mp 100-102 °C (lit.<sup>3</sup> mp 97-100 °C);  $^1H$  NMR (400 MHz,  $CDCl_3$ )  $\delta$  8.20-8.14 (m, 2H), 7.92-7.84 (m, 2H), 7.52-7.44 (m, 4H);  $^{13}C$  NMR (100.6 MHz,  $CDCl_3$ )  $\delta$  139.3 (C), 135.4 (C), 126.6 (CH), 124.2 (CH), 122.7 (CH), 121.5 (CH); EI-LRMS  $m/z$  184 ( $M^+$ , 100); IR (KBr) 3040, 1588, 1425, 1227, 1064, 733  $cm^{-1}$ . Anal. Calcd for  $C_{12}H_8S$  (184.3): C, 78.22; H 4.38. Found: C, 78.29; H, 4.36.

**1-Phenylthiodibenzothiophene (11b):**<sup>10</sup> Treatment of **9b** (0.330 g, 1 mmol) with *t*-BuLi (2.2 mL, 3.3 mmol) according to the general procedure, using diphenyl disulfide (0.262 g, 1.2 mmol) as electrophile and workup as described above yielded **11b** (0.228 g, 78%) as a white solid: mp 115-117 °C;  $^1H$  NMR (200 MHz,  $CDCl_3$ )  $\delta$  9.30-9.17 (m, 1H), 8.00-7.81 (m, 2H), 7.61-7.22 (m, 9H);  $^{13}C$  NMR (50.3 MHz,  $CDCl_3$ )  $\delta$  140.7 (C), 139.6 (C), 135.3 (C), 135.2 (C), 134.5 (C), 131.0 (C), 130.3 (CH), 129.9 (CH), 129.2 (CH), 126.7 (CH), 126.5 (CH), 126.4 (CH), 126.1 (CH), 124.2 (CH), 122.2 (CH); EI-

LRMS  $m/z$  292 ( $M^+$ , 100); IR (KBr) 3052, 1584, 1471  $\text{cm}^{-1}$ ; HRMS calcd for  $\text{C}_{18}\text{H}_{12}\text{S}_2$ , 292.0380; found, 292.0386. Anal. Calcd for  $\text{C}_{18}\text{H}_{12}\text{S}_2$  (292.4): C, 73.93; H, 4.14. Found: C, 74.05; H, 4.12.

**1-Bromodibenzothiophene (11c):** Treatment of **9b** (0.330 g, 1 mmol) with *t*-BuLi (2.2 mL, 3.3 mmol) according to the general procedure, using 1,2-dibromoethane (0.225 g, 1.2 mmol) as electrophile and workup as described above yielded **11c** (0.200 g, 76%) as a white solid: mp 85-87 °C (lit.<sup>11</sup> mp 79-80 °C);  $^1\text{H}$  NMR (400 MHz,  $\text{CDCl}_3$ )  $\delta$  9.22-9.19 (m, 1H), 7.86-7.84 (m, 1H), 7.77 (dd,  $J$  = 8.0, 0.8 Hz, 1H), 7.65 (dd,  $J$  = 7.6, 0.8 Hz, 1H), 7.54-7.50 (m, 2H), 7.22 (dd,  $J$  = 8.0, 7.6 Hz, 1H);  $^{13}\text{C}$  NMR (50.3 MHz,  $\text{CDCl}_3$ )  $\delta$  141.5 (C), 139.7 (C), 134.9 (C), 132.5 (C), 129.8 (CH), 126.9 (CH), 126.6 (CH), 125.4 (CH), 123.8 (CH), 122.3 (CH), 121.7 (CH), 118.1 (C); EI-LRMS  $m/z$  264 ( $M^+ + 2$ , 100), 262 ( $M^+$ , 100); IR (KBr) 1580, 1541, 1429, 1394, 1021, 722  $\text{cm}^{-1}$ ; HRMS calcd for  $\text{C}_{12}\text{H}_7\text{BrS}$ , 261.9452; found, 261.9457. Anal. Calcd for  $\text{C}_{12}\text{H}_7\text{BrS}$  (263.2): C, 54.77; H, 2.68. Found: C, 54.90; H, 2.67.

**1-[1-Hydroxy-1-(4-methylphenyl)methyl]dibenzothiophene (11d):** Treatment of **9b** (0.330 g, 1 mmol) with *t*-BuLi (2.2 mL, 3.3 mmol) according to the general procedure, using 4-methylbenzaldehyde (0.144 g, 1.2 mmol) as electrophile and workup as described above yielded **11d** (0.228 g, 75%) as a white solid: mp 123-125 °C;  $^1\text{H}$  NMR (300 MHz,  $\text{CDCl}_3$ )  $\delta$  8.28 (d,  $J$  = 7.7 Hz, 1H), 7.89-7.82 (m, 2H), 7.51-7.35 (m, 3H), 7.29 (d,  $J$  = 8.1 Hz, 2H), 7.16 (d,  $J$  = 8.1 Hz, 2H), 6.78 (d,  $J$  = 4.4 Hz, 1H), 2.64 (d,  $J$  = 4.3 Hz, 1H), 2.34 (s, 3H);  $^{13}\text{C}$  NMR (75.4 MHz,  $\text{CDCl}_3$ )  $\delta$  140.1 (C), 139.8 (C), 139.6 (C), 138.8 (C), 137.5 (C), 134.7 (C), 132.8 (C), 129.2 (CH), 127.3 (CH), 126.02 (CH), 125.97 (CH), 125.8 (CH), 124.3 (CH), 123.8 (CH), 122.6 (CH), 122.3 (CH), 73.0 (CH), 21.1 ( $\text{CH}_3$ ); EI-LRMS  $m/z$  304 ( $M^+$ , 100); IR (KBr) 3313, 3047, 1516, 1409, 1301, 1178, 1157, 1030, 758, 753  $\text{cm}^{-1}$ ; HRMS calcd for  $\text{C}_{20}\text{H}_{16}\text{OS}$ , 304.0922; found, 304.0934. Anal. Calcd for  $\text{C}_{20}\text{H}_{16}\text{OS}$  (304.4): C, 78.91; H, 5.30. Found: C, 79.14; H, 5.32.



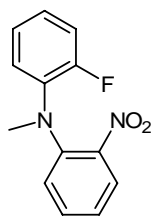

**1a**

**<sup>1</sup>H-NMR:**

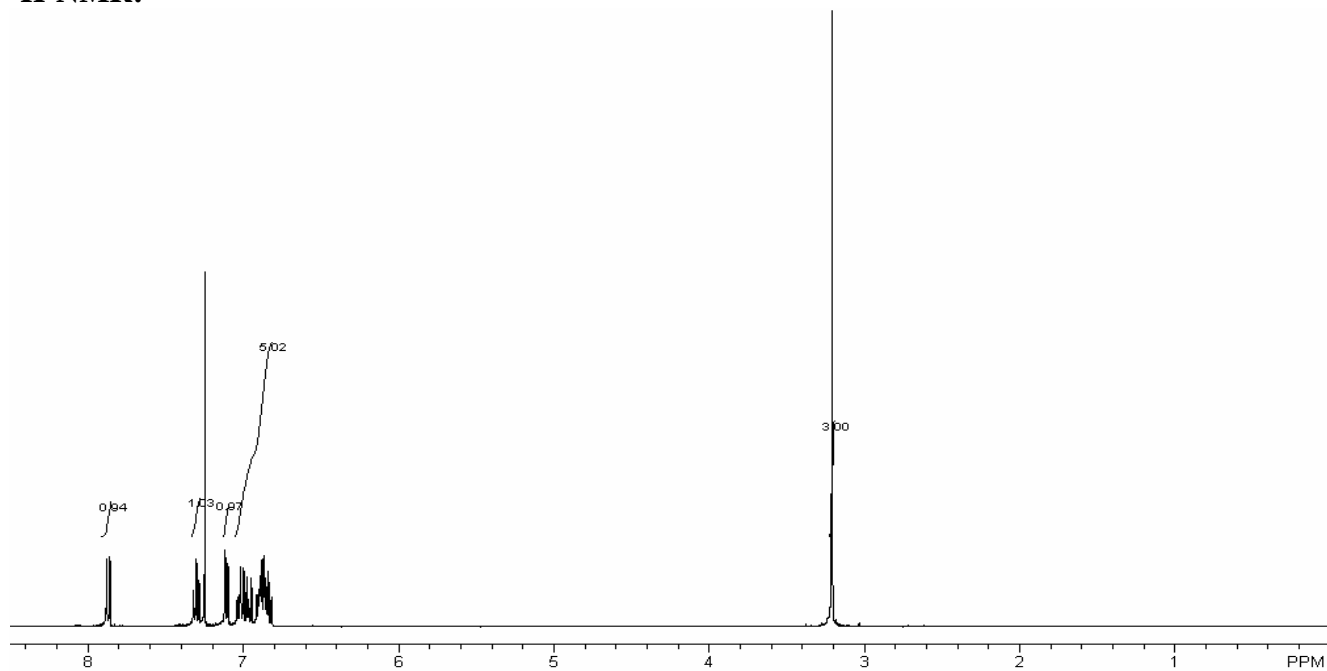

**<sup>13</sup>C-NMR:**

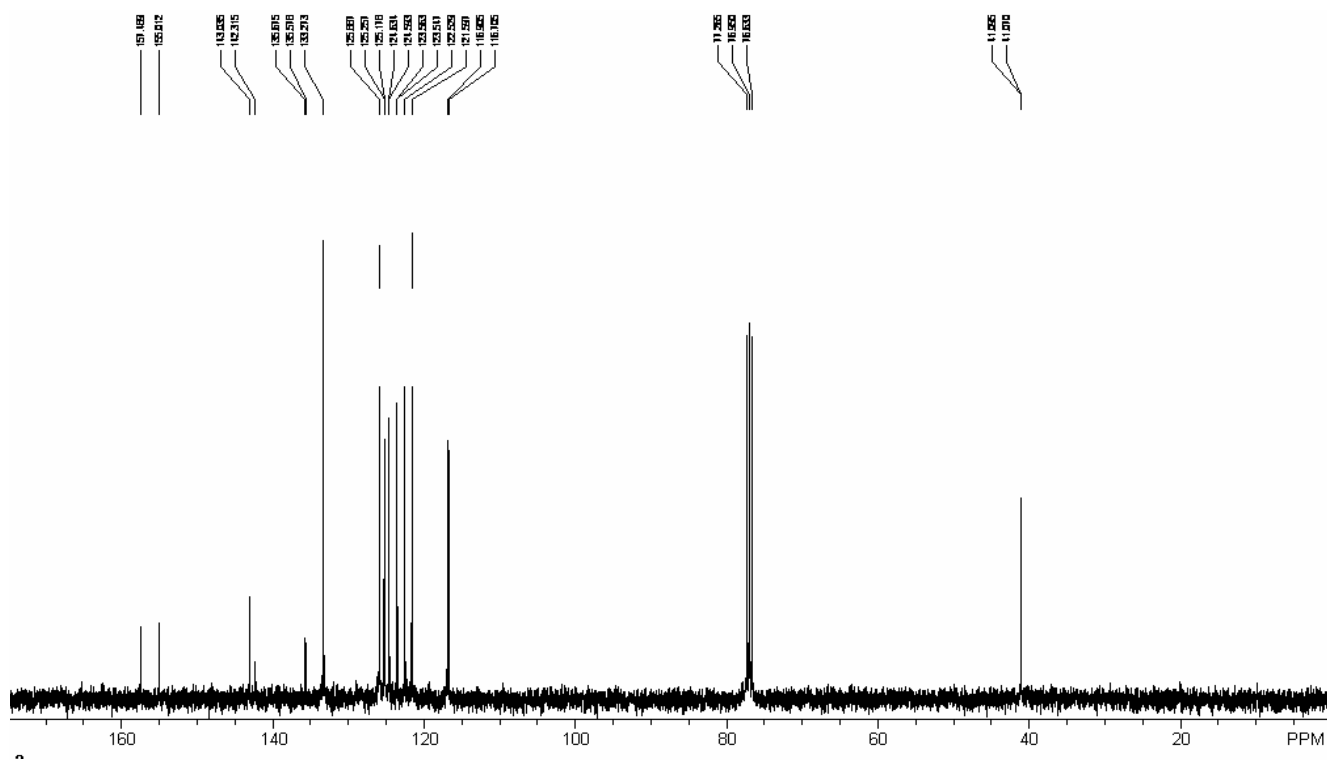

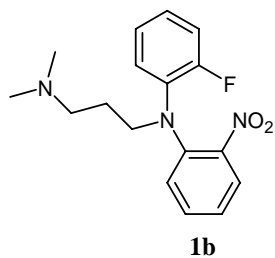

**<sup>1</sup>H-NMR:**

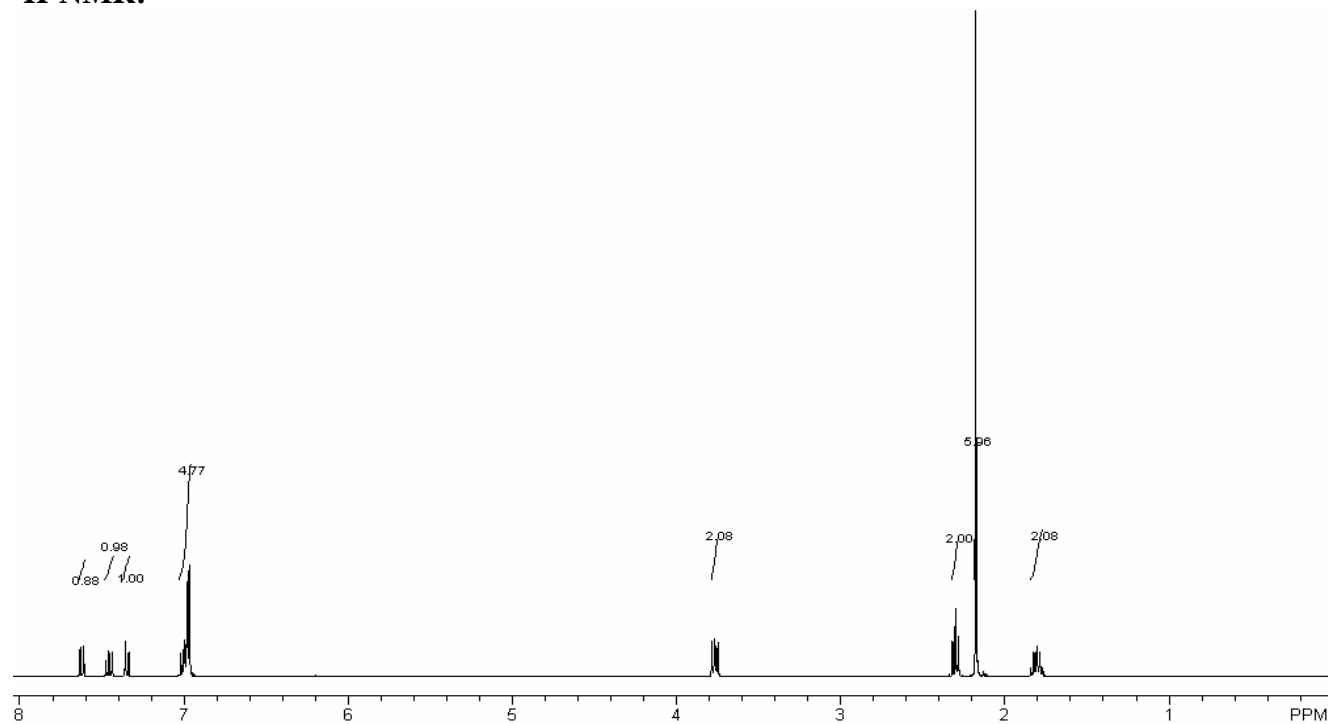

**<sup>13</sup>C-NMR:**

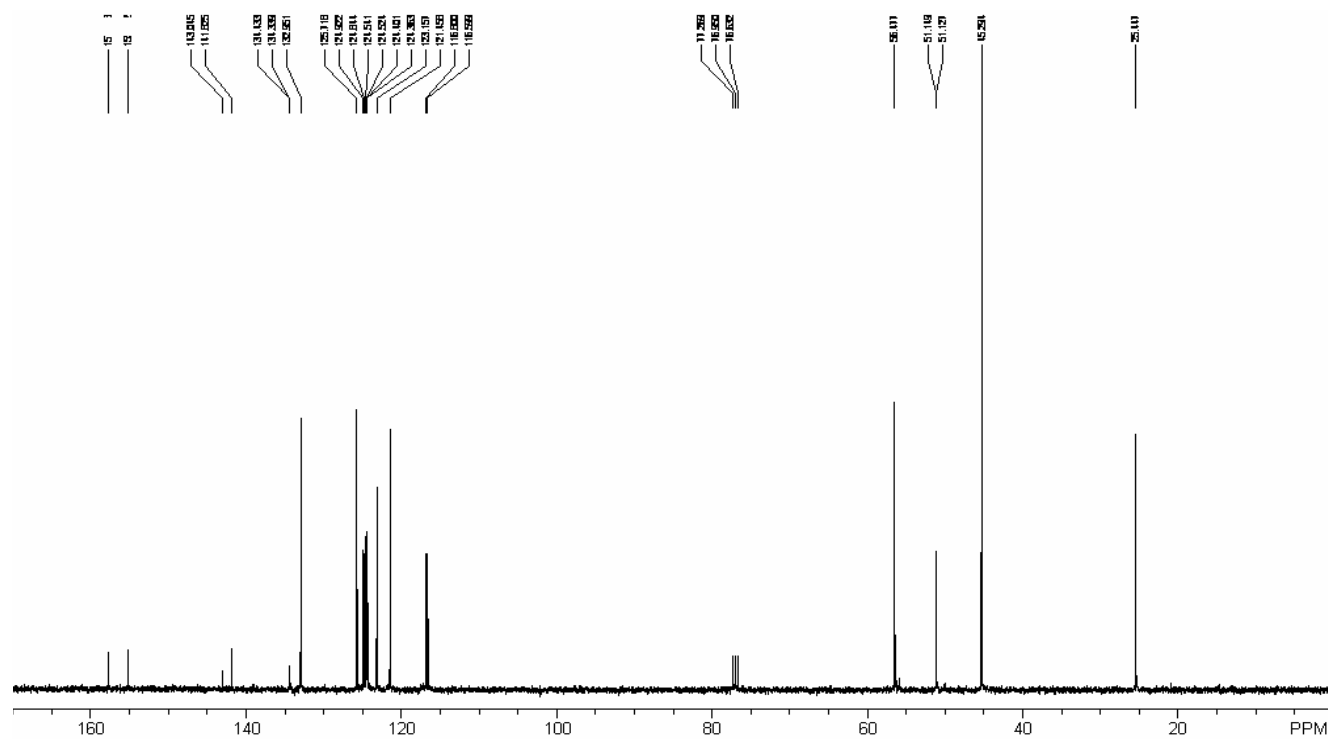

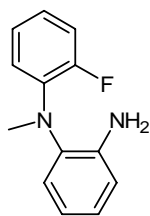

**2a**

**$^1\text{H}$ -NMR:**

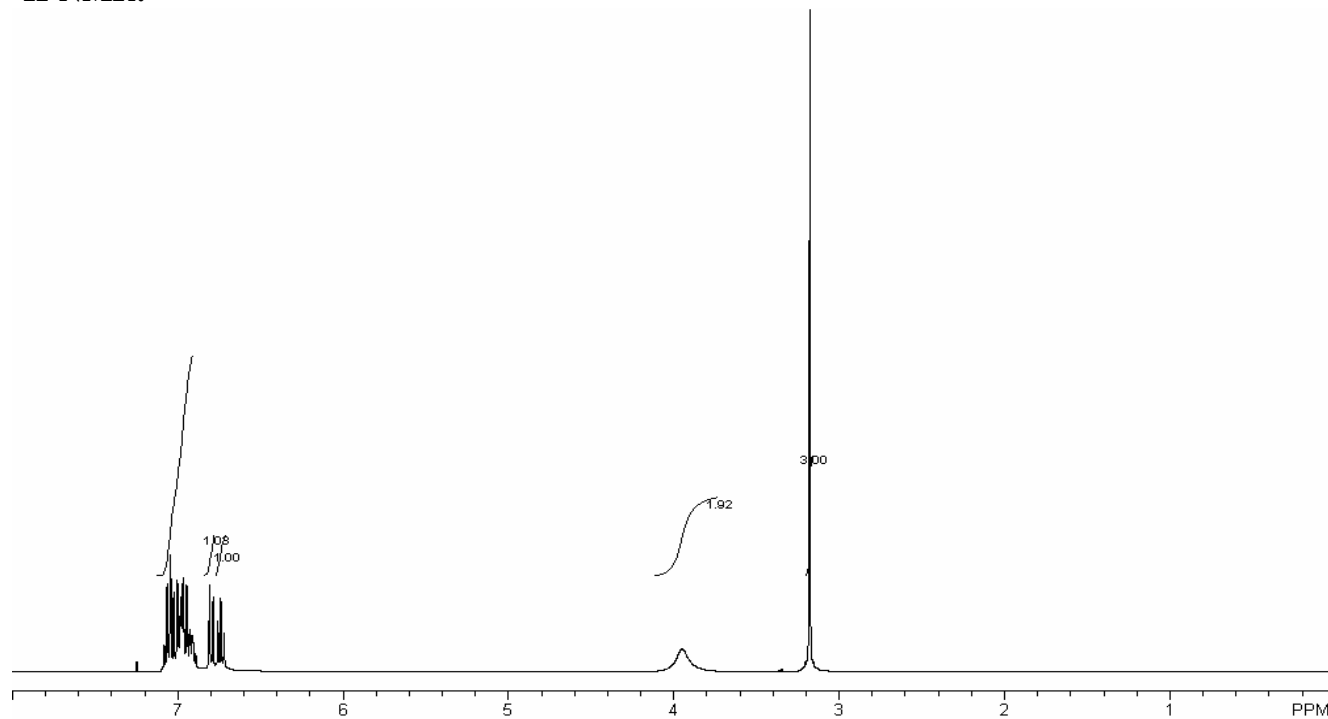

**$^{13}\text{C}$ -NMR:**

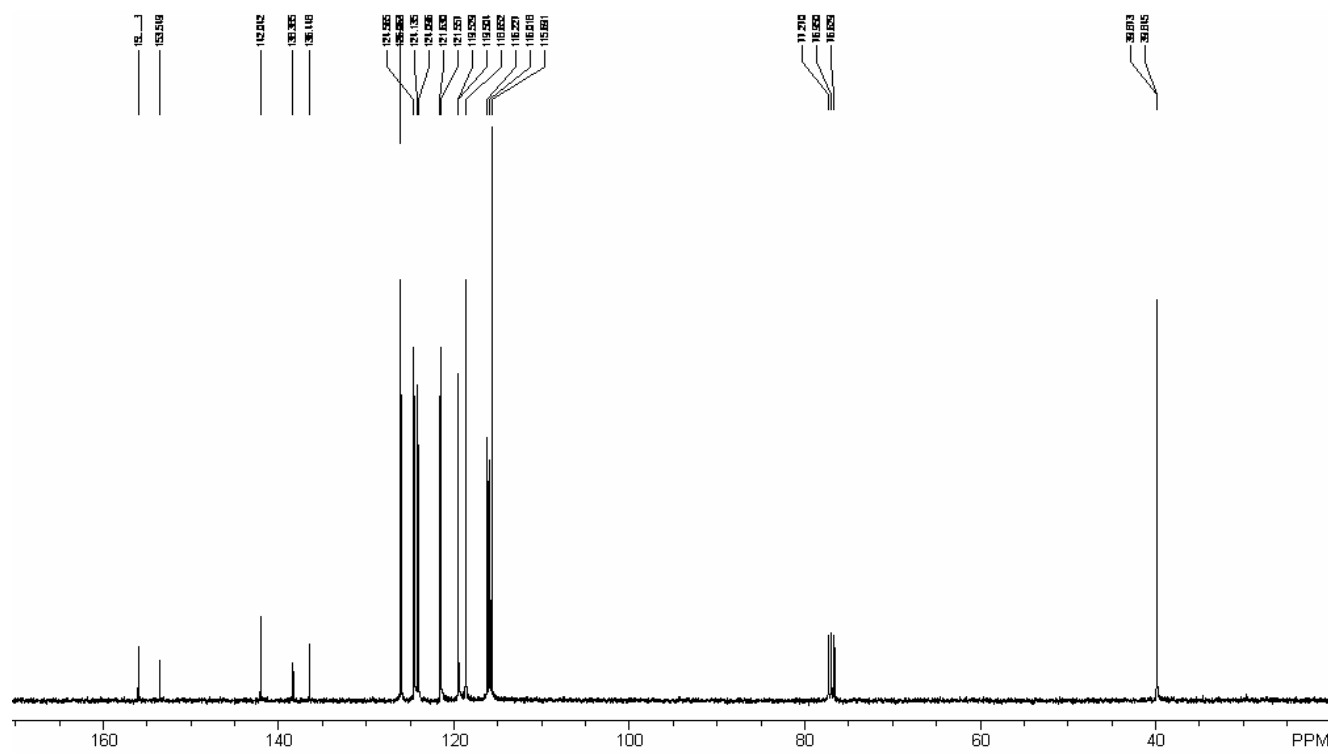

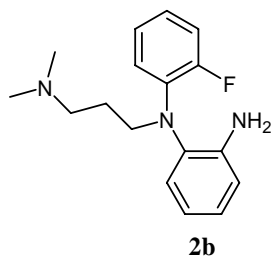

**$^1\text{H}$ -NMR:**

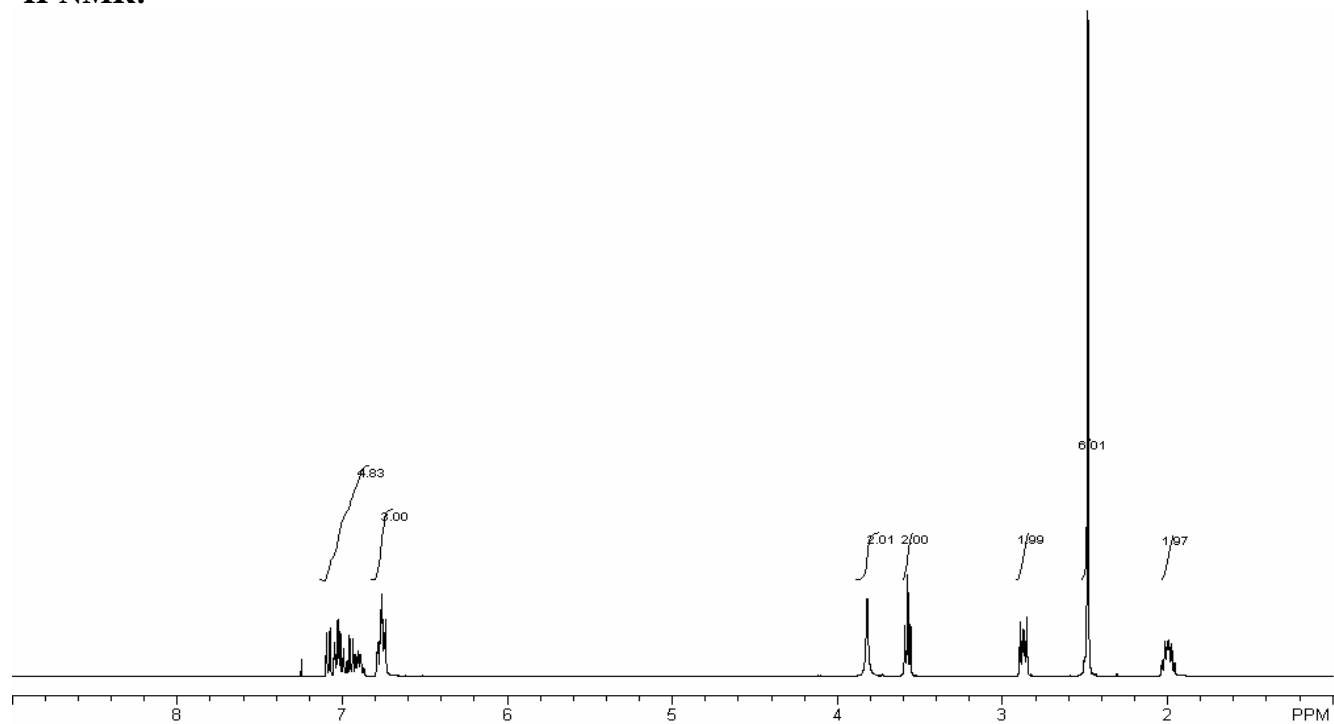

**$^{13}\text{C}$ -NMR:**

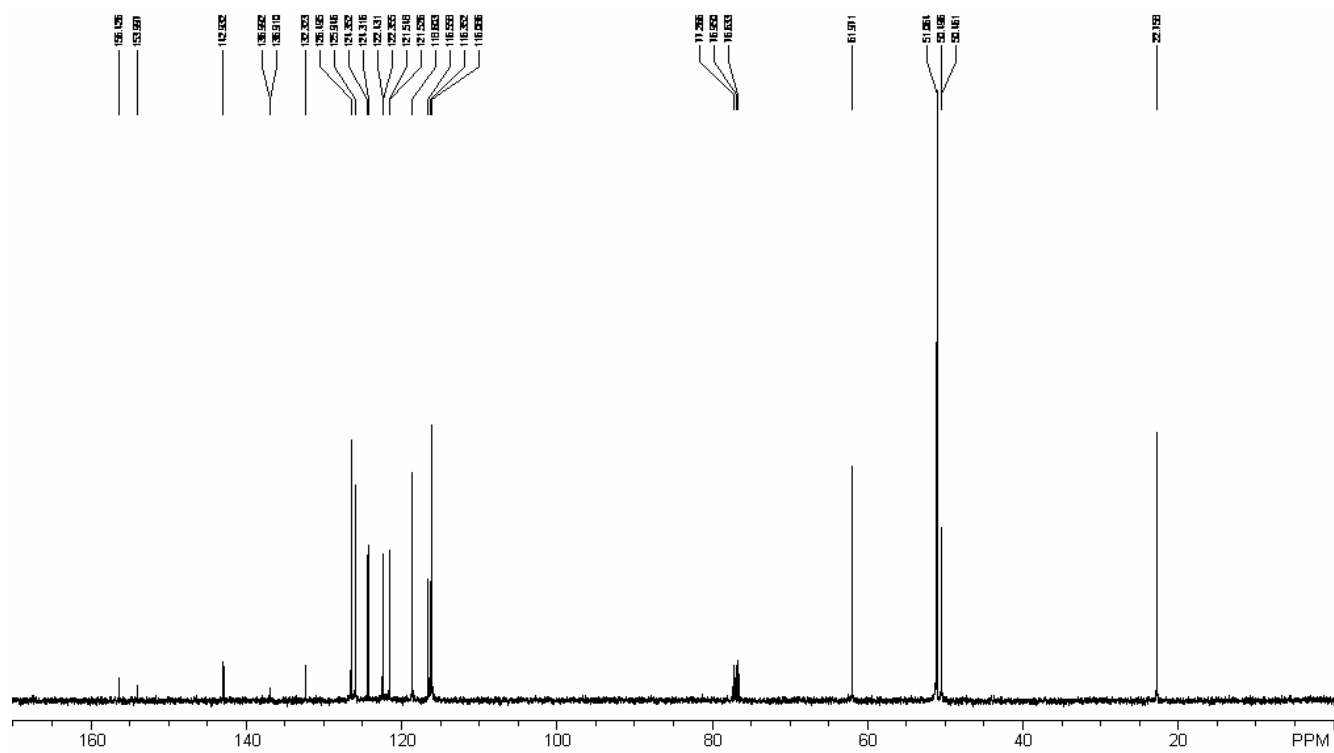

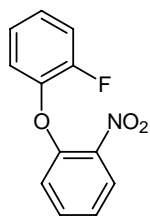

**7a**

**$^1\text{H}$ -NMR:**

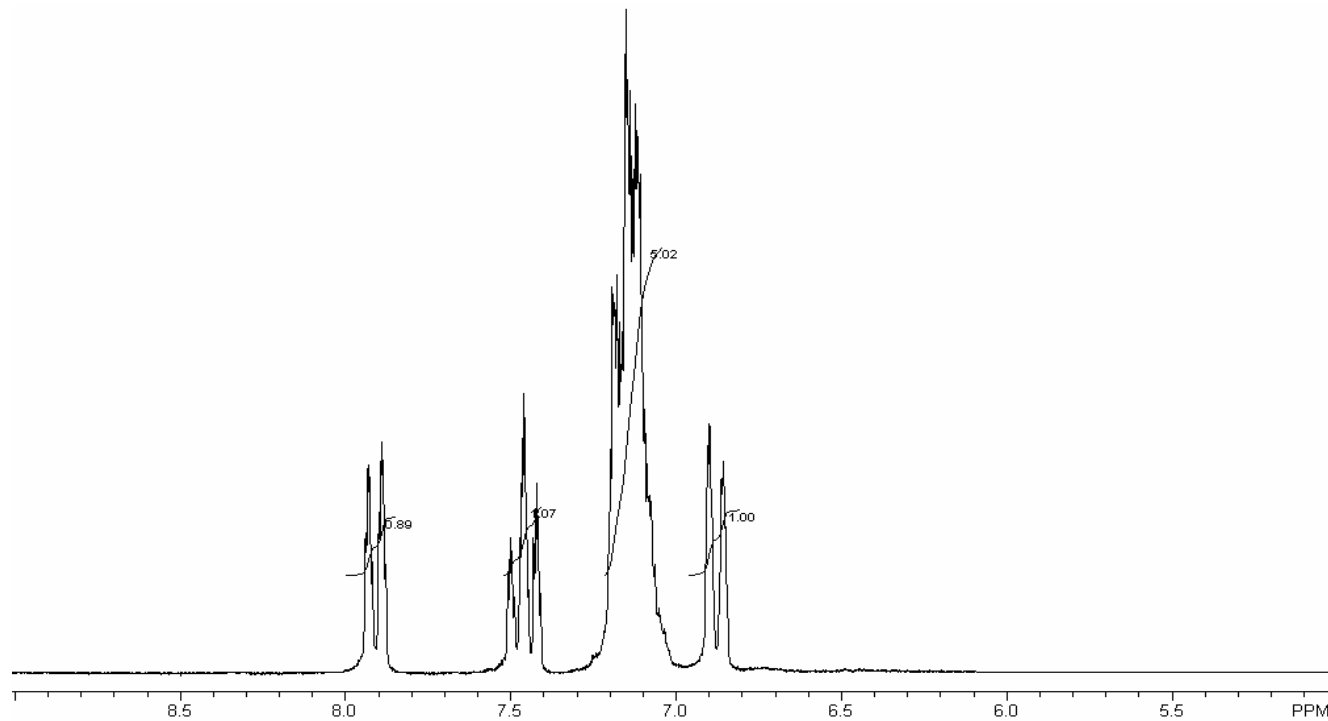

**$^{13}\text{C}$ -NMR:**

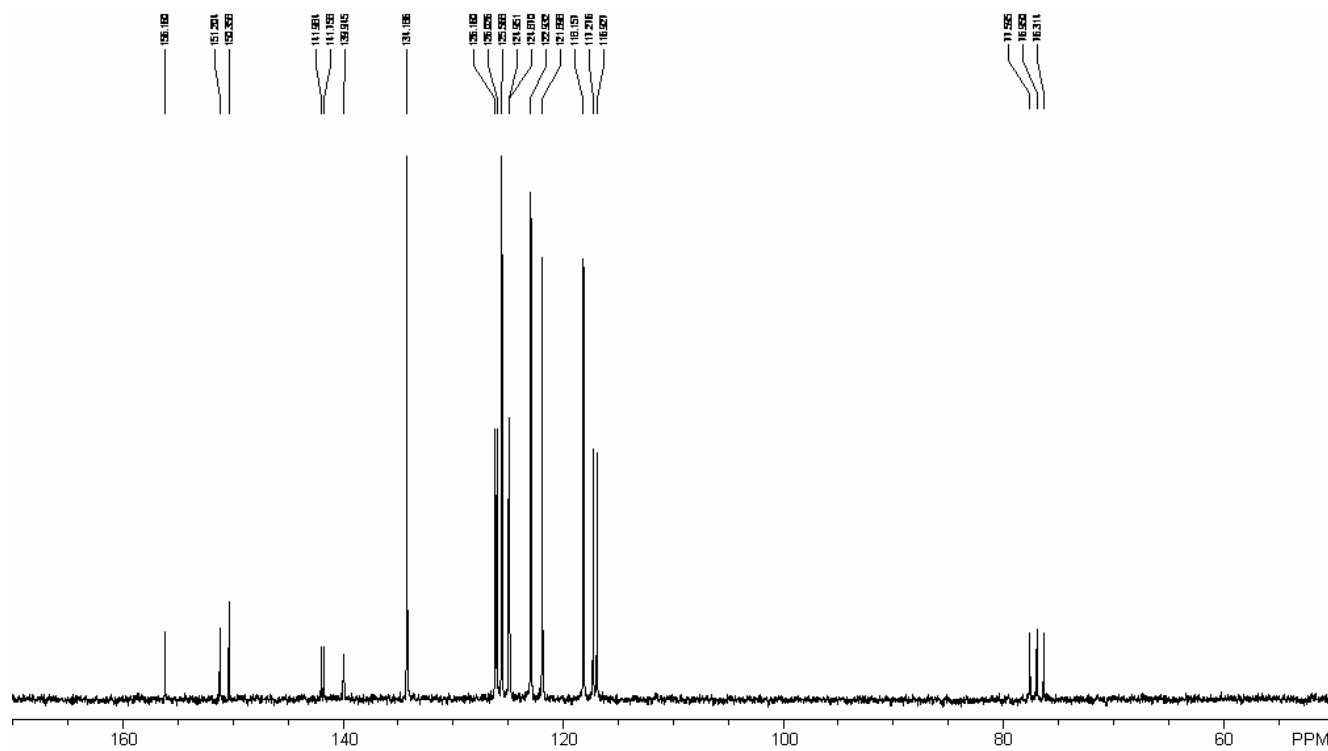

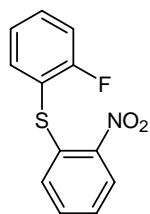

**7b**

**<sup>1</sup>H-NMR:**

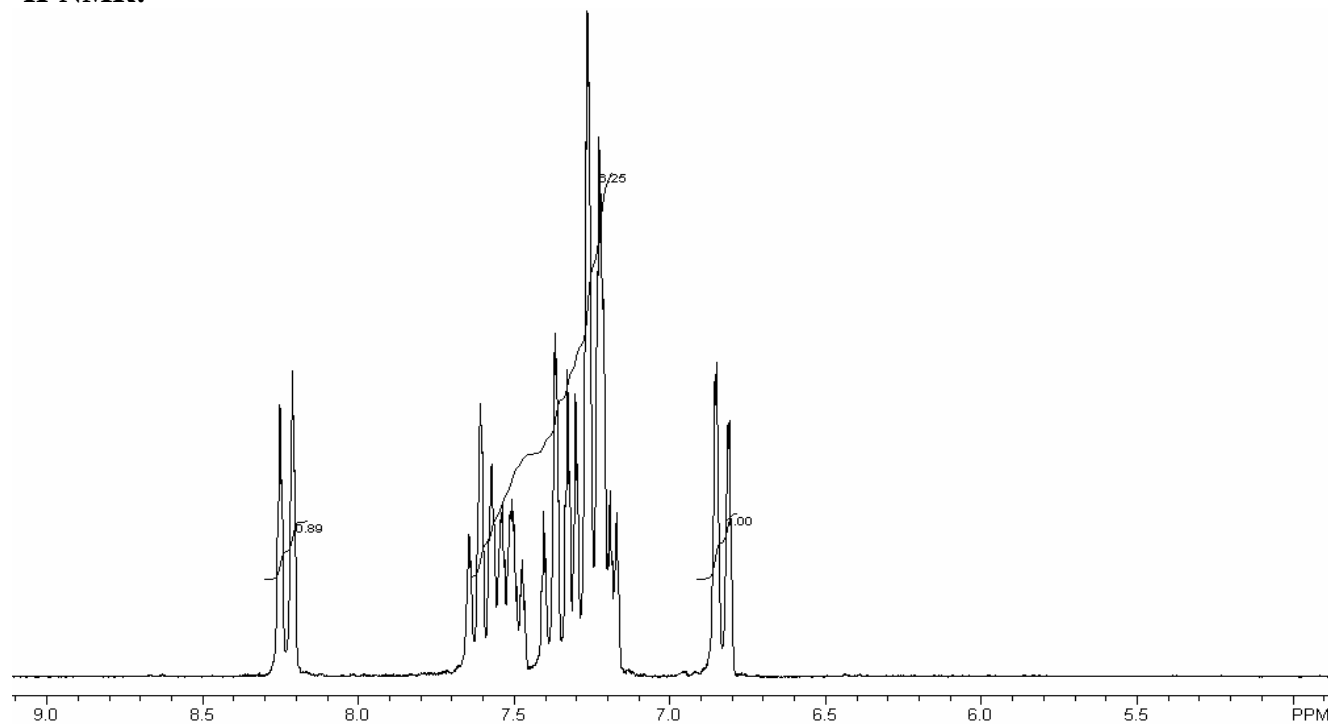

**<sup>13</sup>C-NMR:**

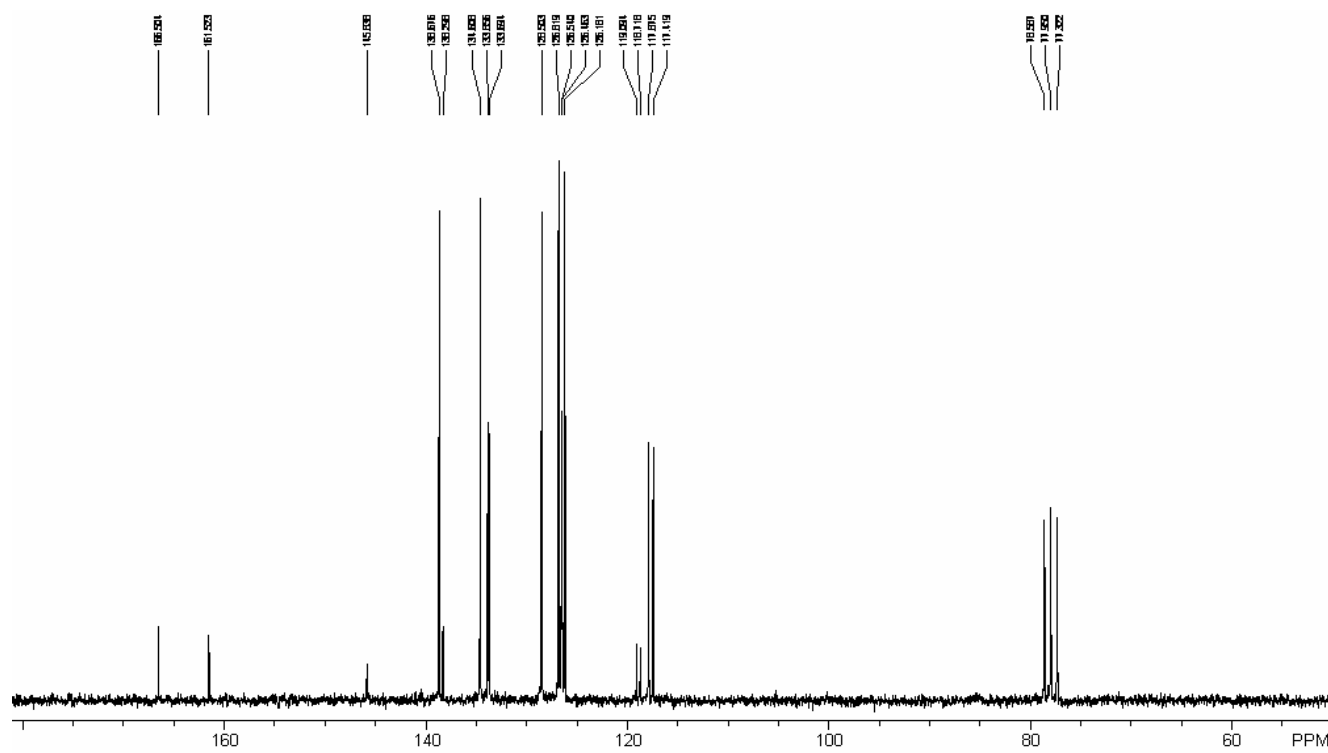

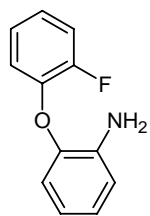

**8a**

**$^1\text{H}$ -NMR:**

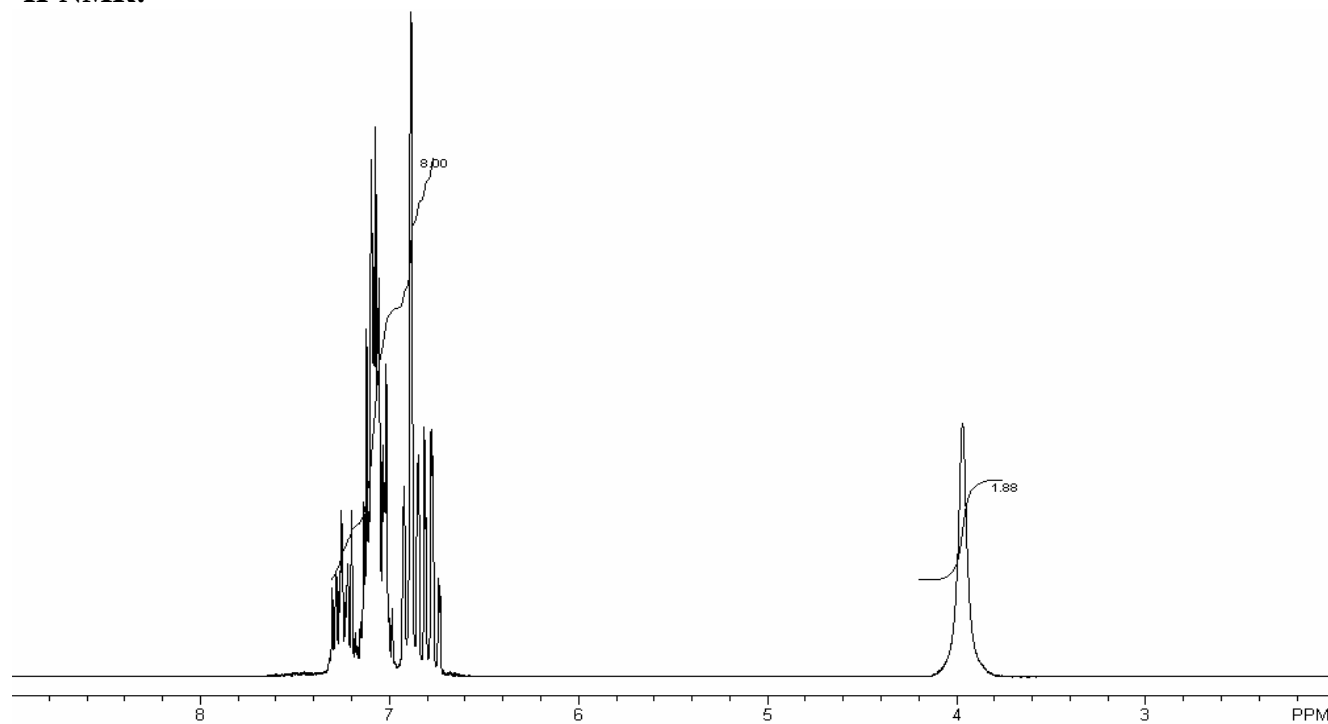

**$^{13}\text{C}$ -NMR:**

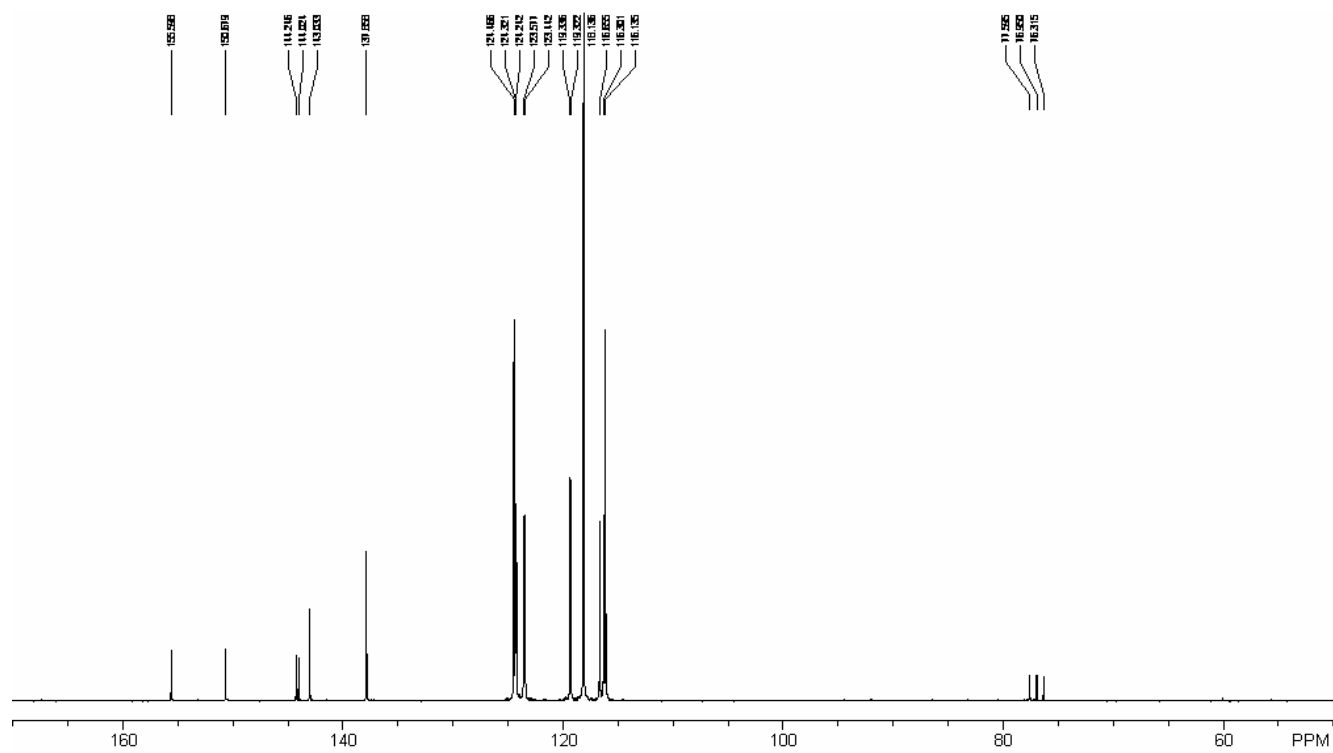

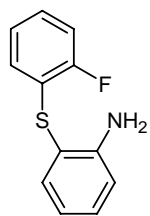

**8b**

**<sup>1</sup>H-NMR:**

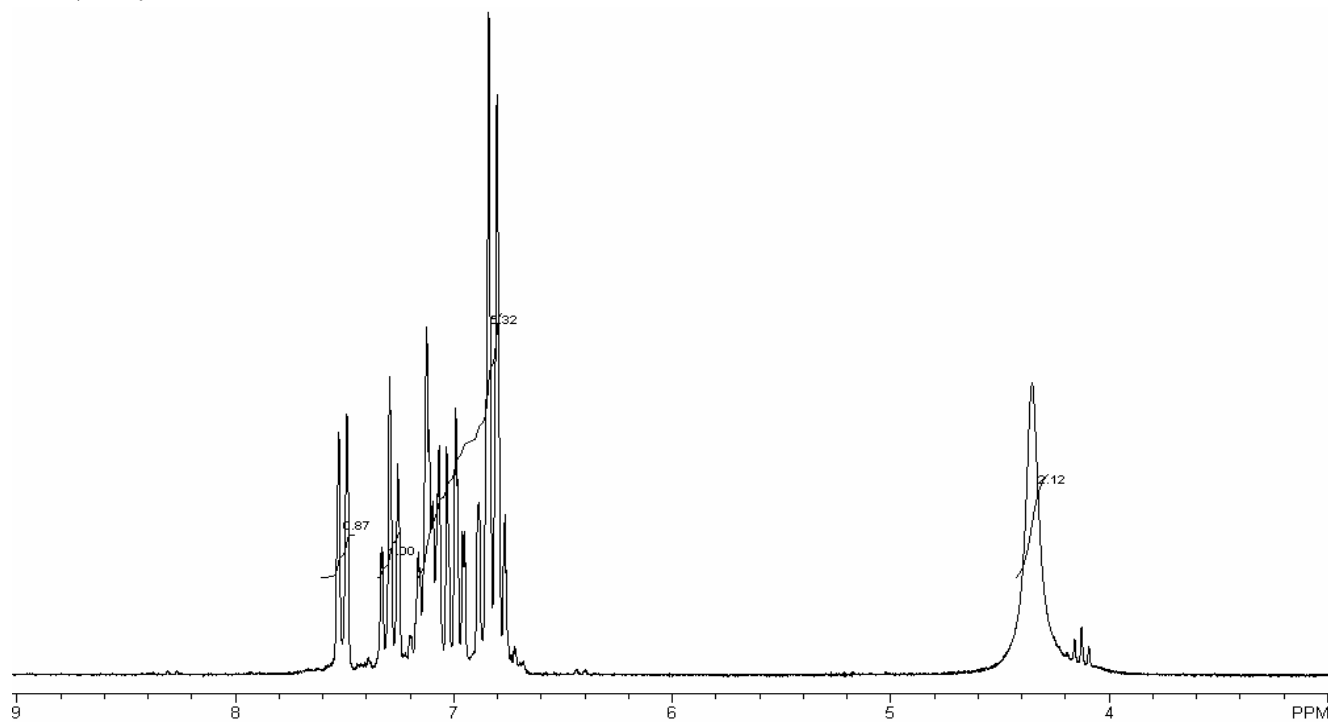

**<sup>13</sup>C-NMR:**

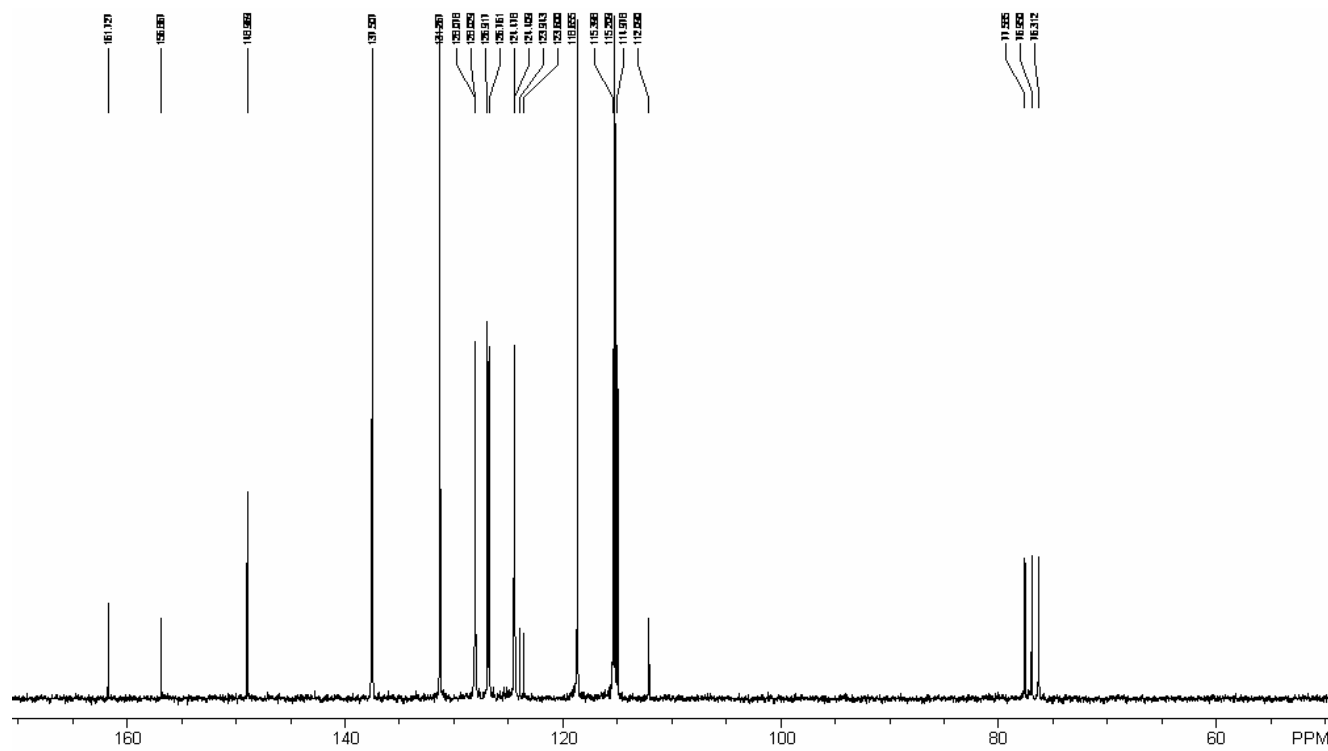



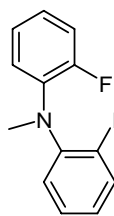

**3a**

**<sup>1</sup>H-NMR:**

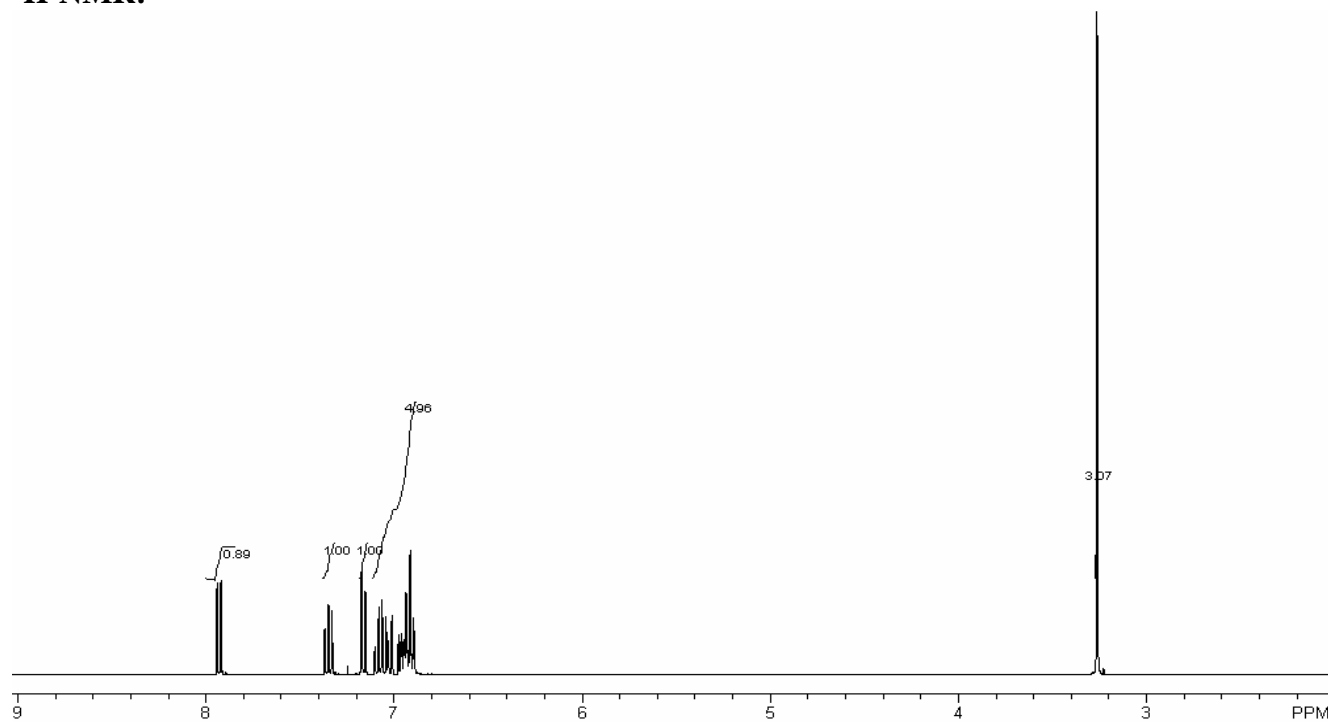

**<sup>13</sup>C-NMR:**

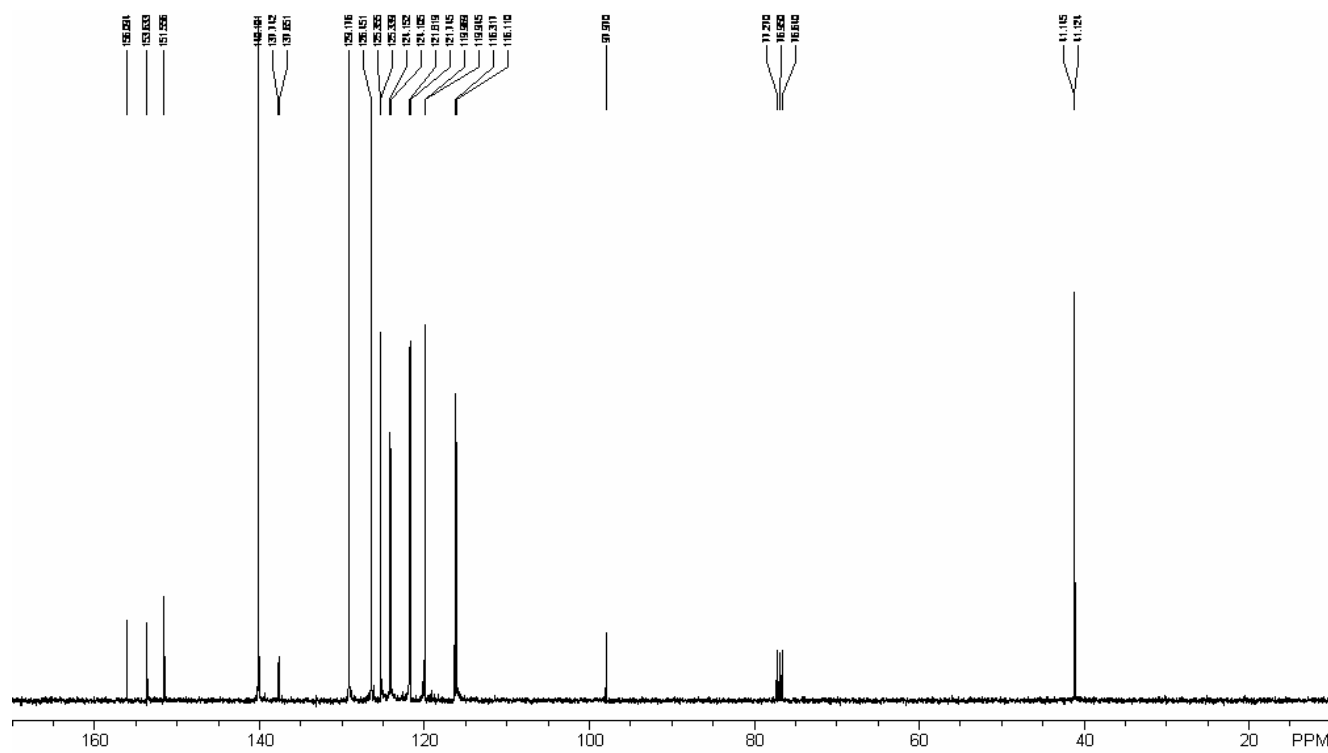

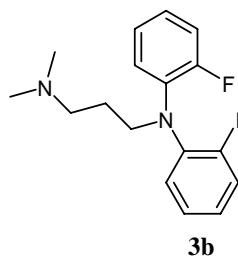

**<sup>1</sup>H-NMR:**

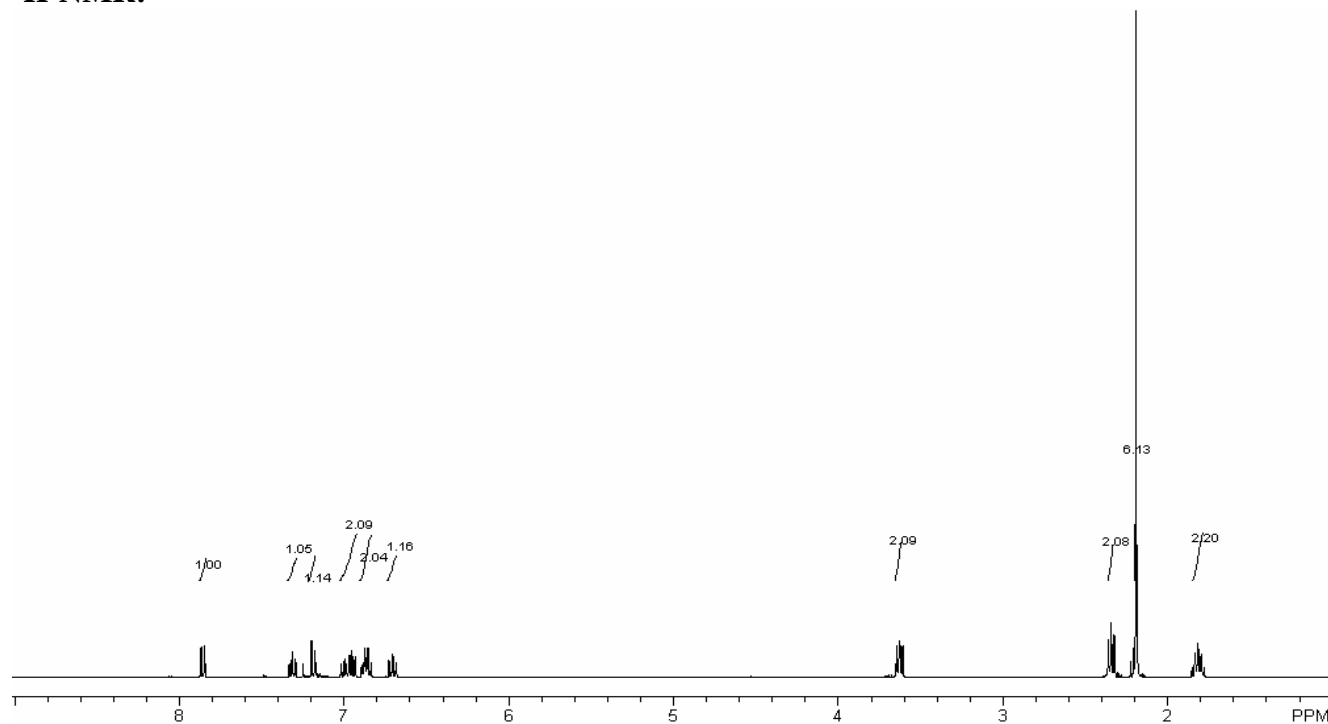

**<sup>13</sup>C-NMR:**

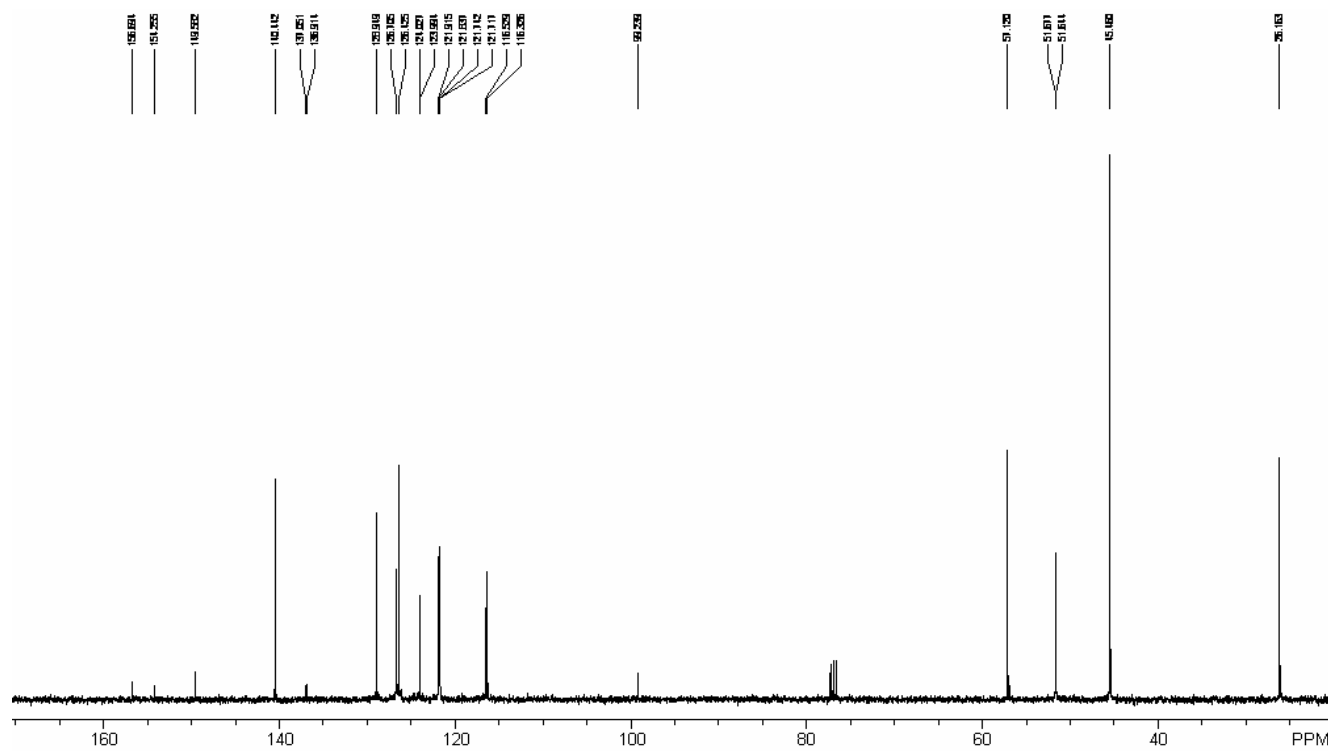

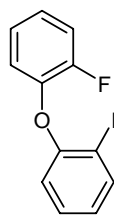

**9a**

**<sup>1</sup>H-NMR:**

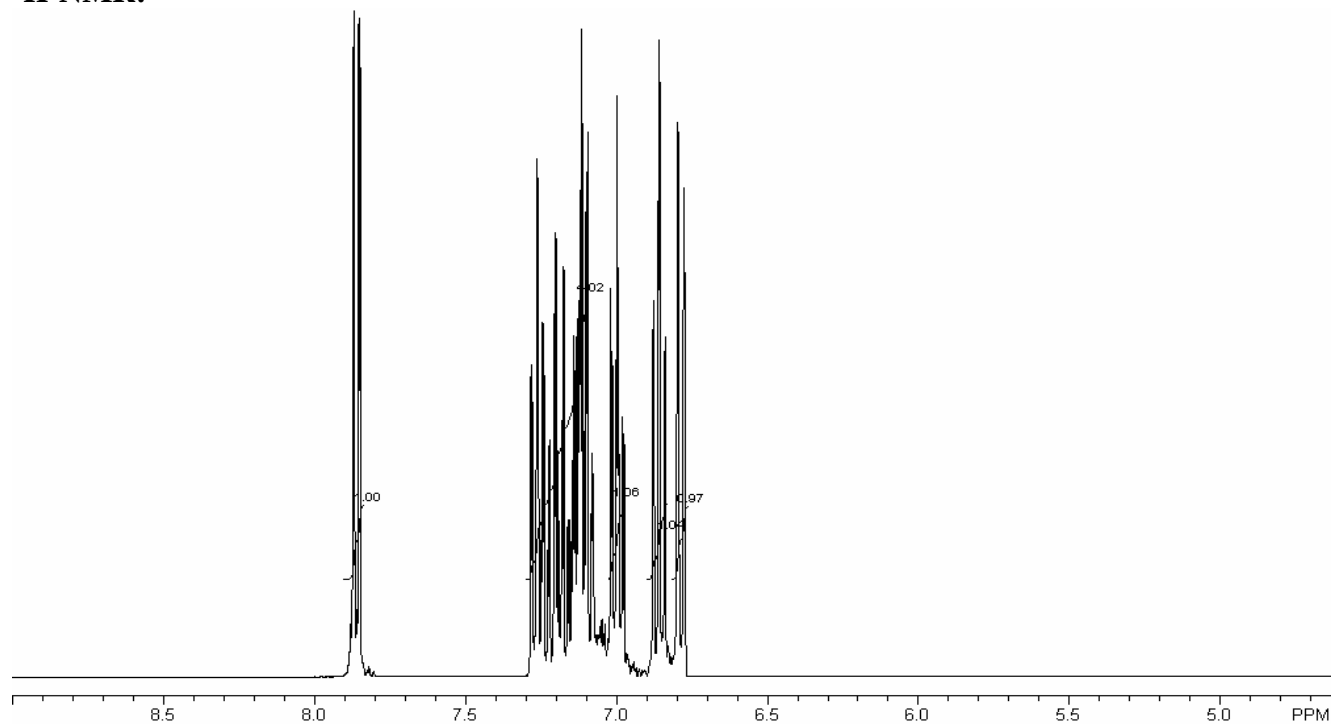

**<sup>13</sup>C-NMR:**

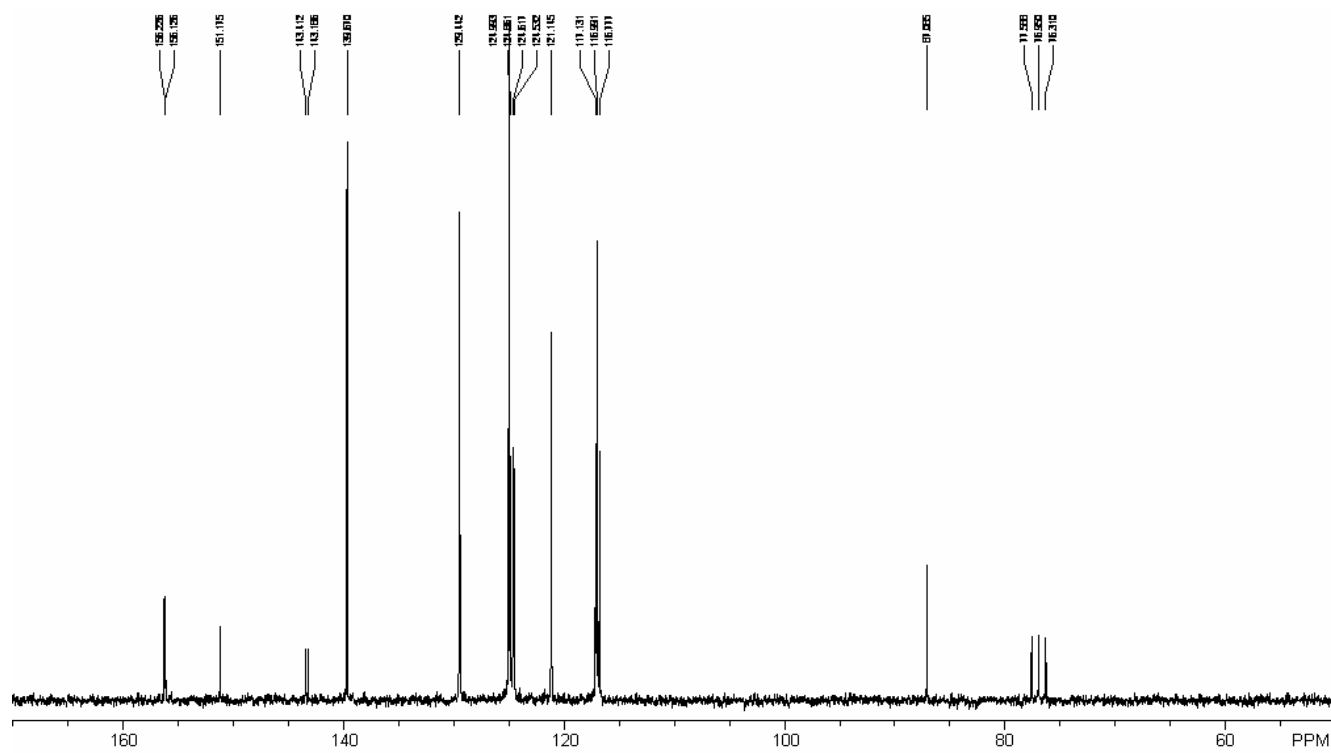

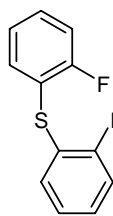

**9b**

**$^1\text{H}$ -NMR:**

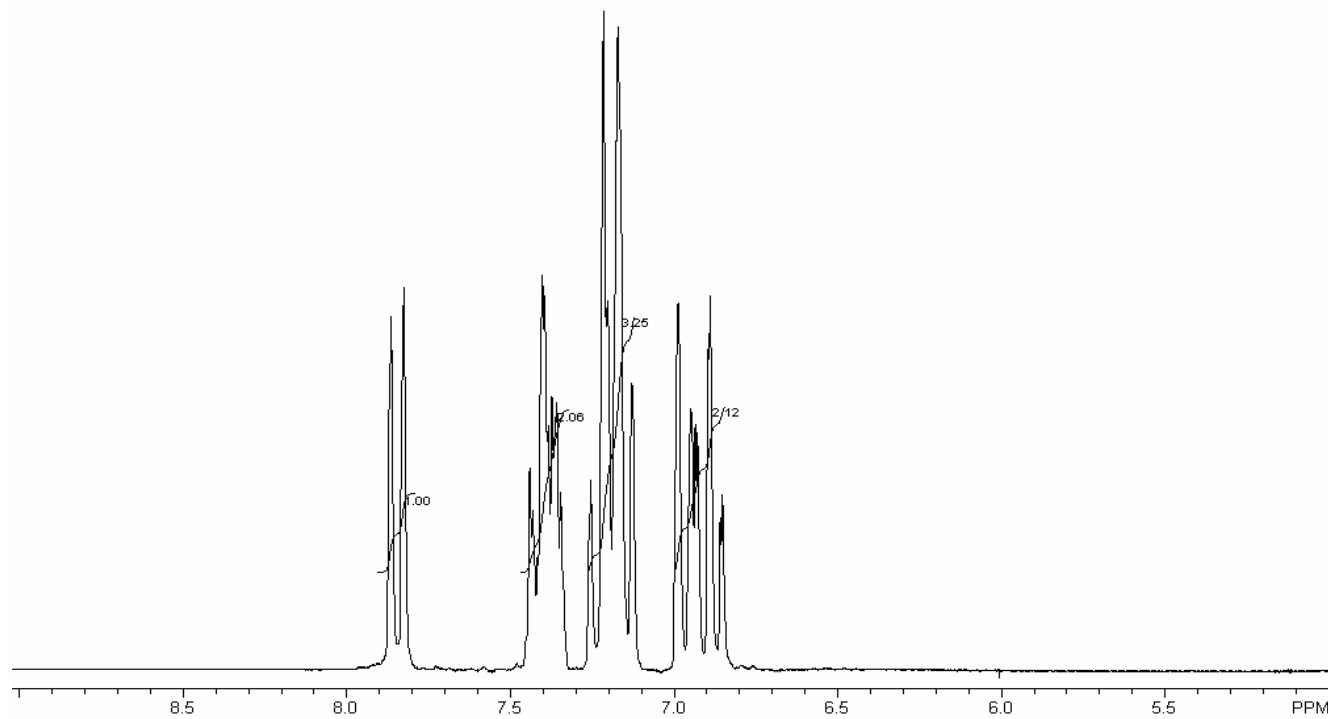

**$^{13}\text{C}$ -NMR:**

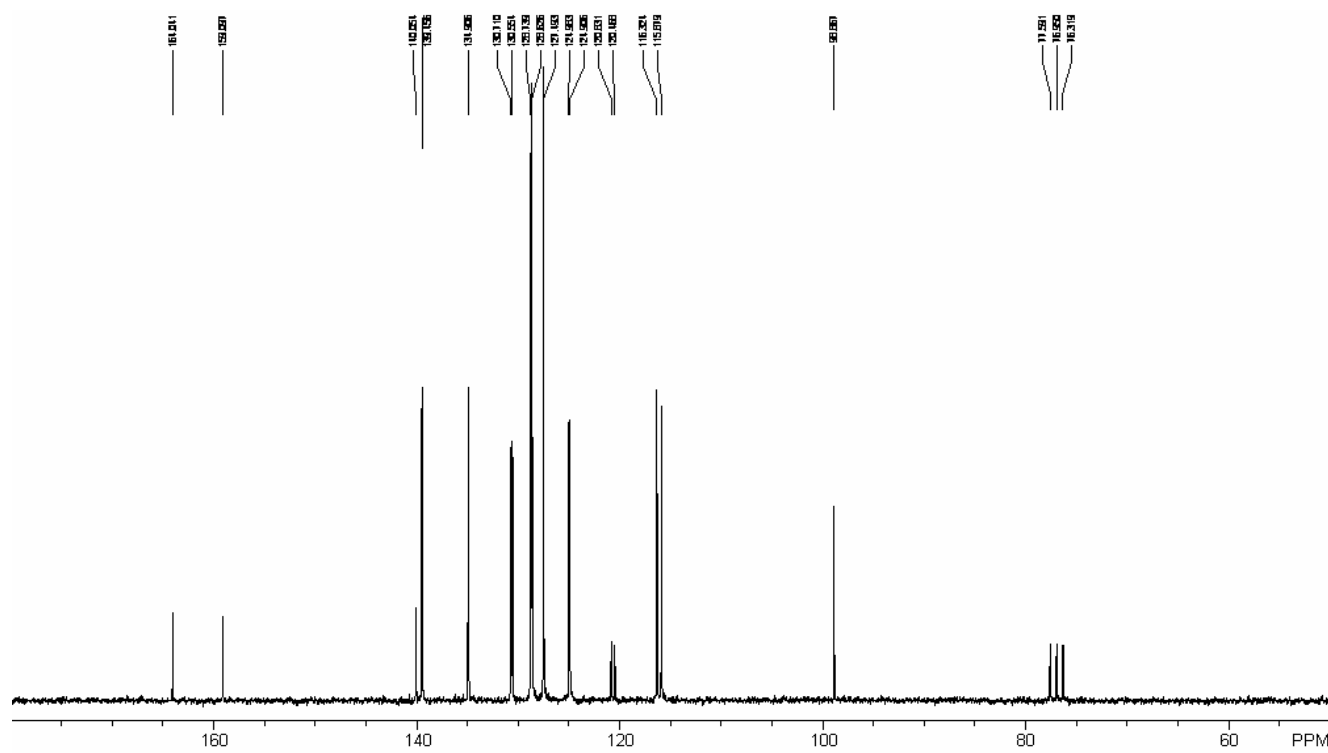

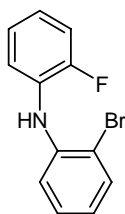

*N*-(2-Bromophenyl)-2-fluoroaniline

<sup>1</sup>H-NMR:

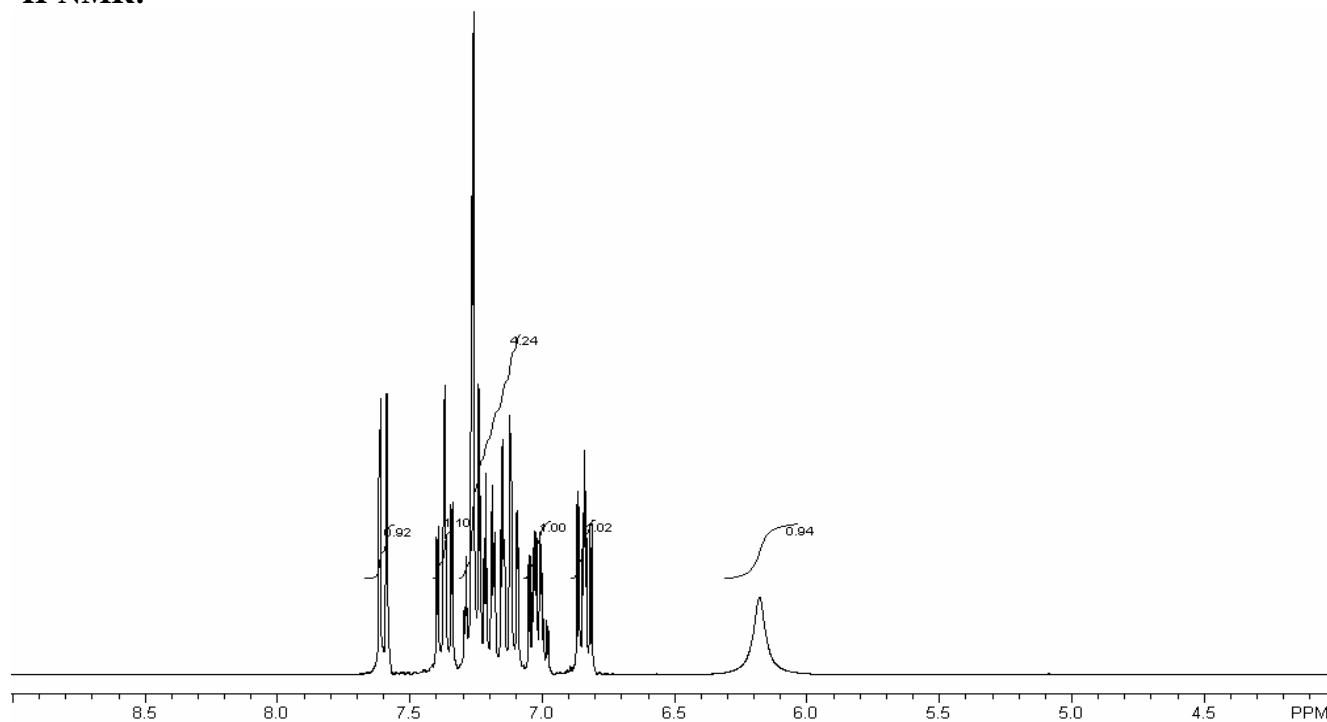

<sup>13</sup>C-NMR:

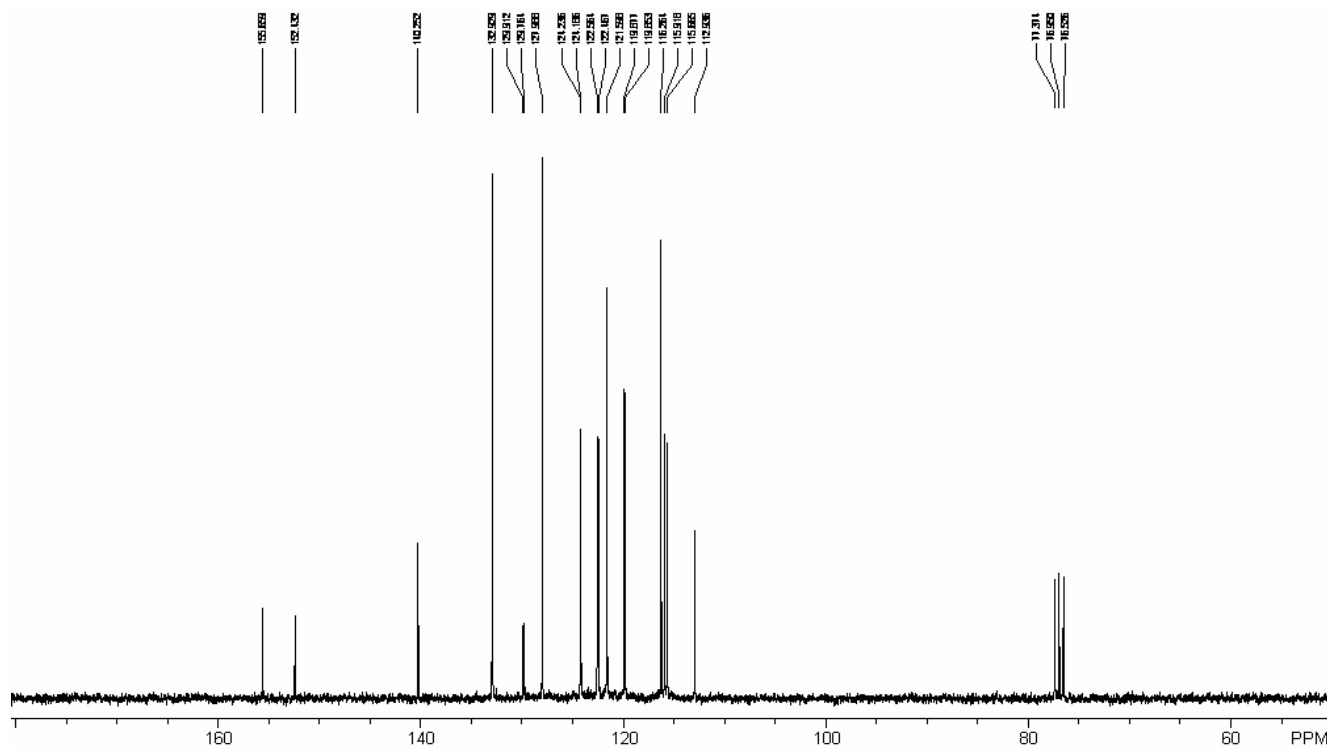

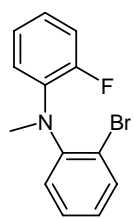

**3c**

**$^1\text{H}$ -NMR:**

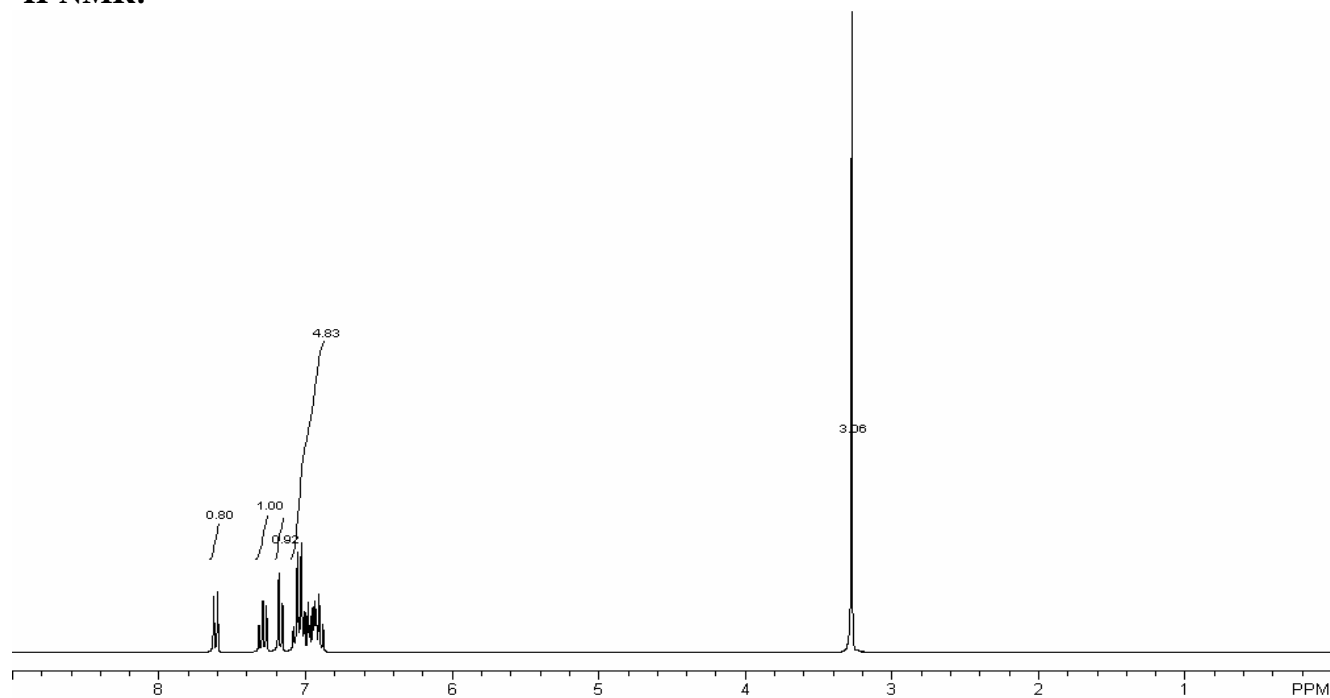

**$^{13}\text{C}$ -NMR:**

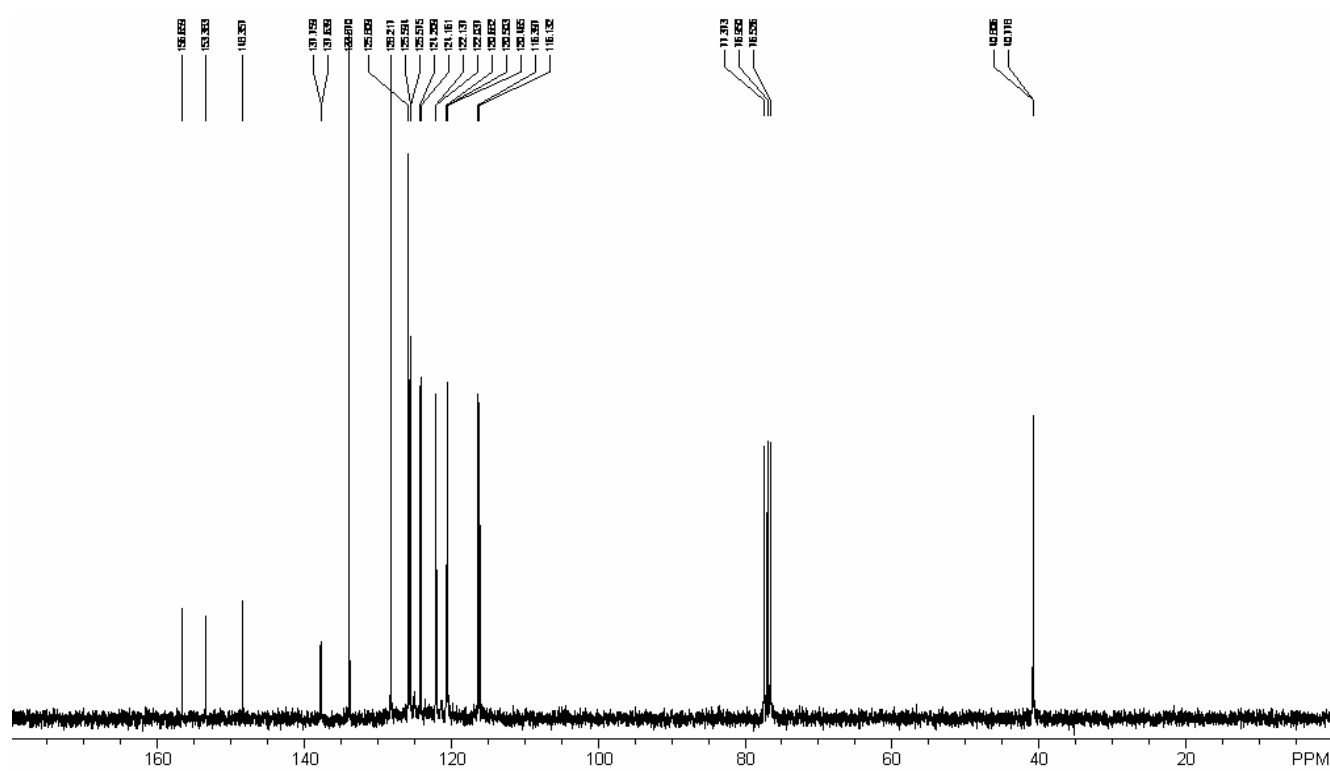

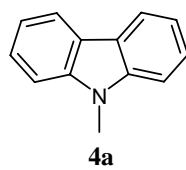

**$^1\text{H}$ -NMR:**

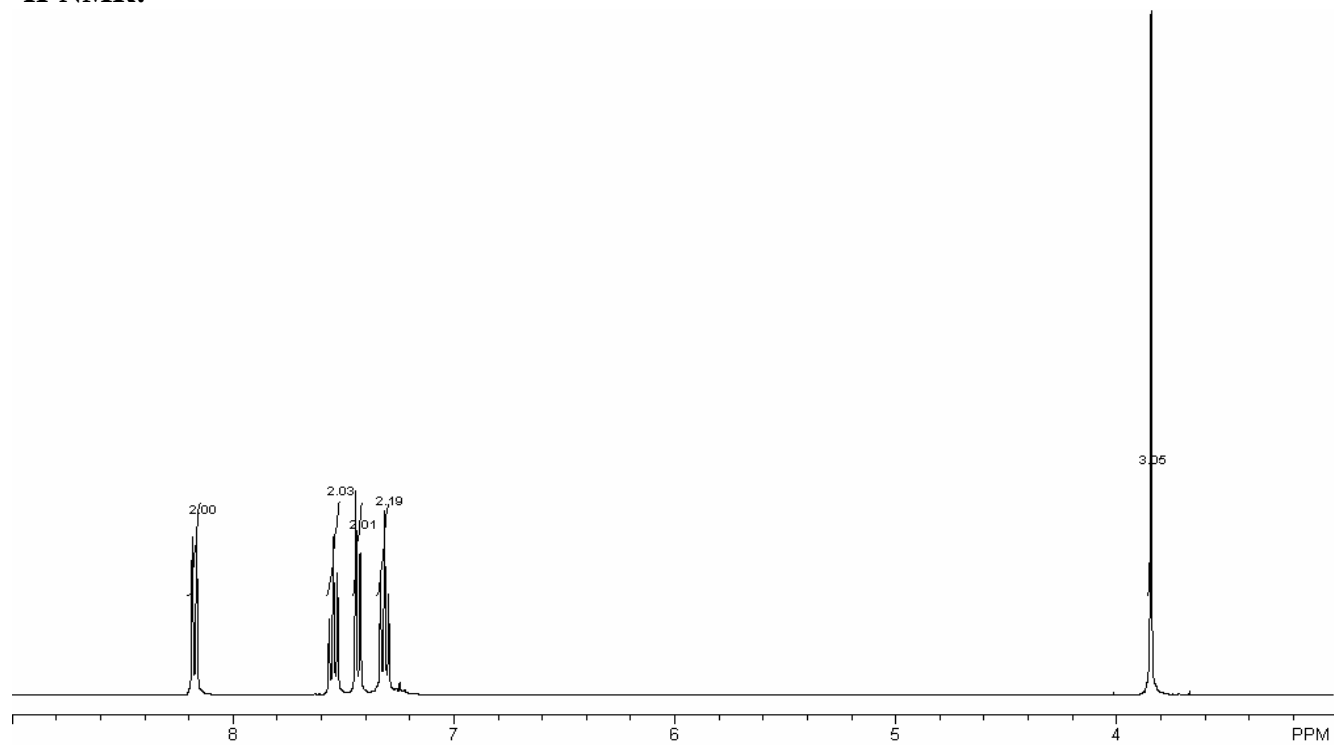

**$^{13}\text{C}$ -NMR:**

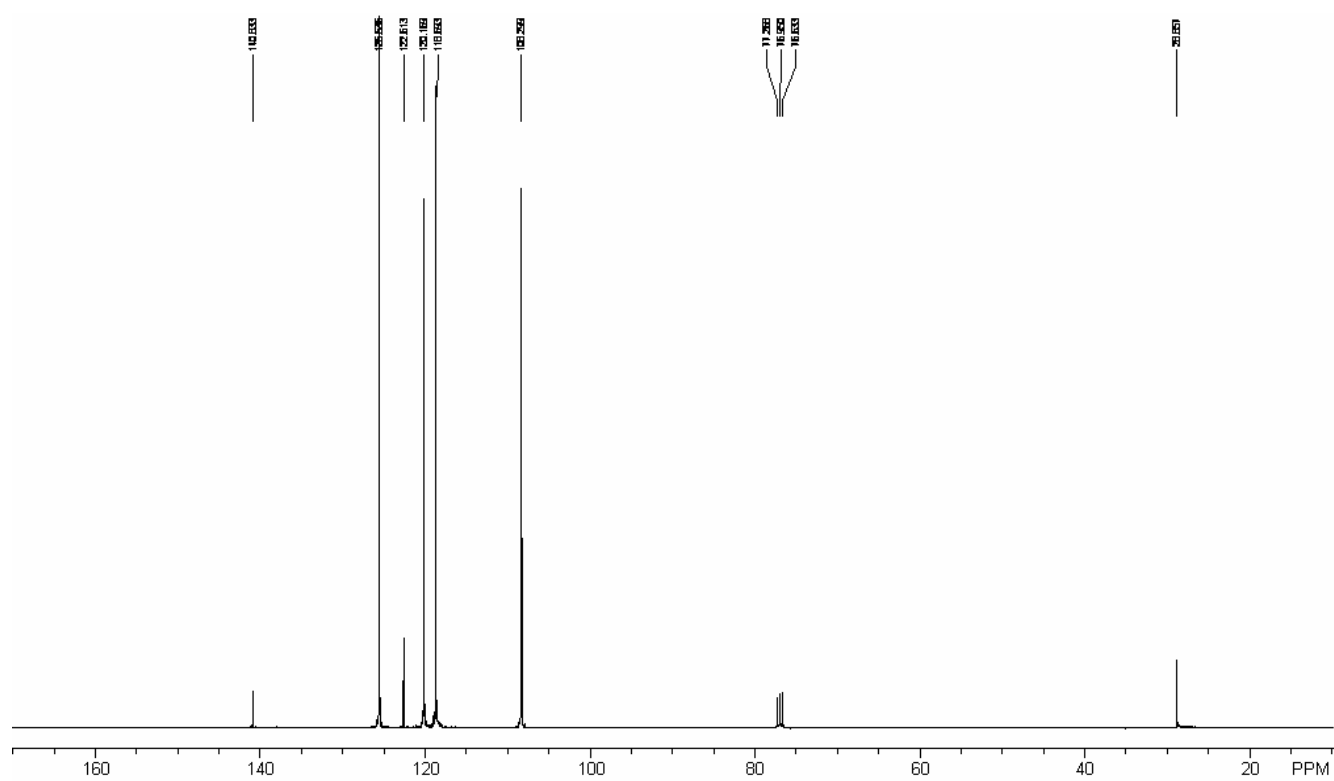

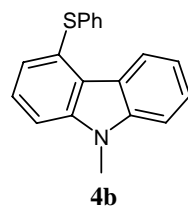

**$^1\text{H}$ -NMR:**

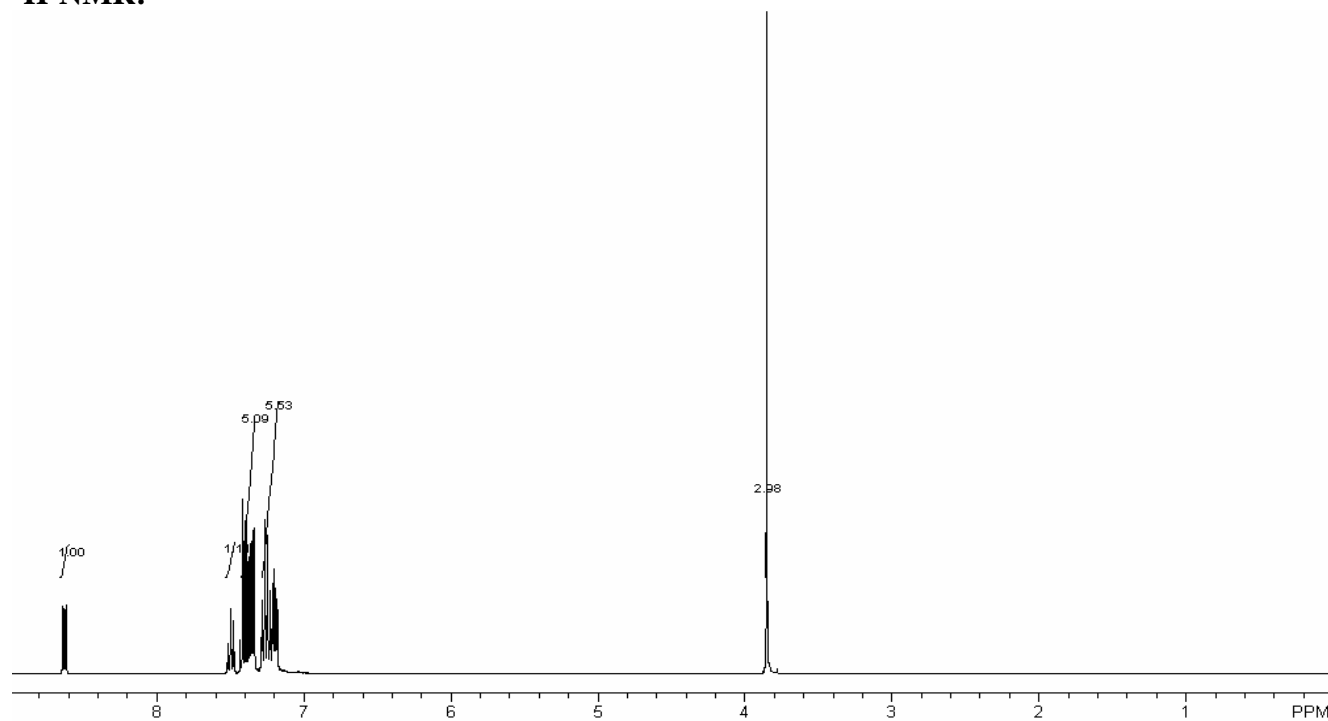

**$^{13}\text{C}$ -NMR:**

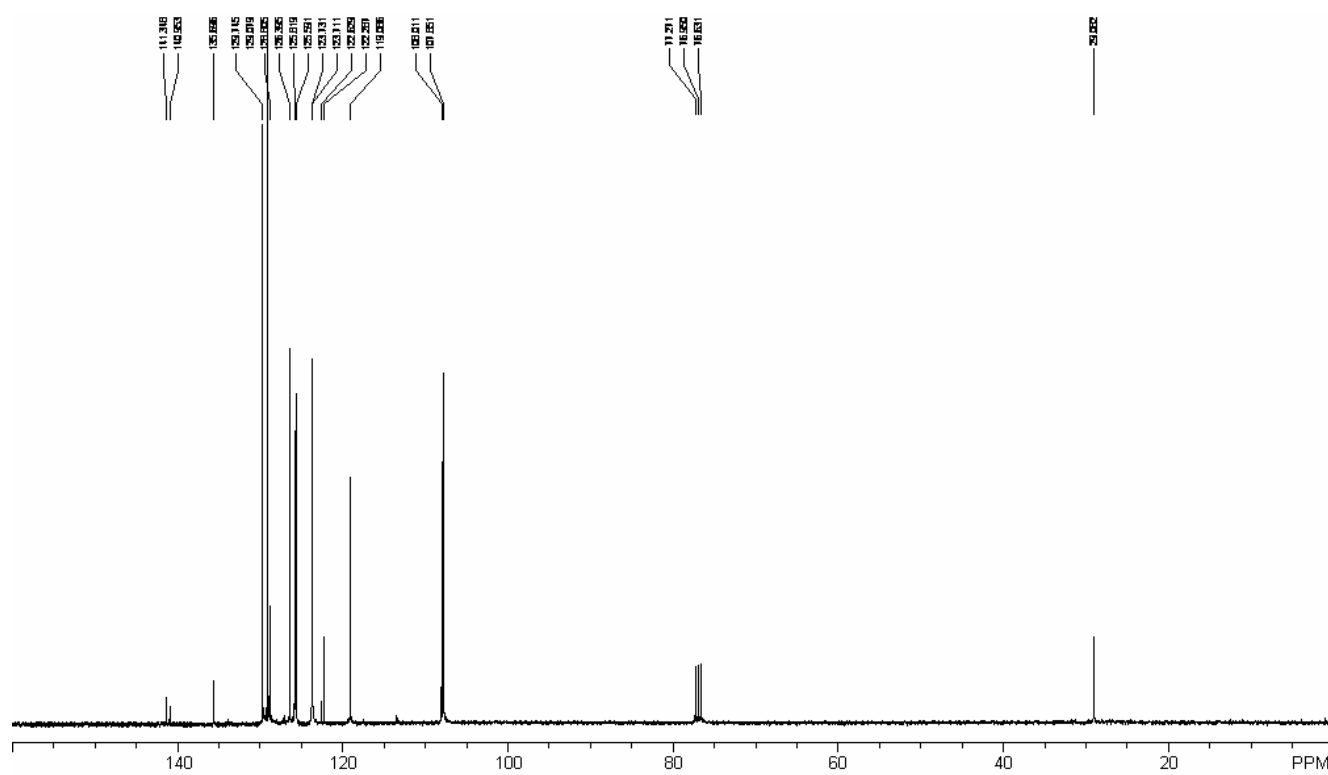



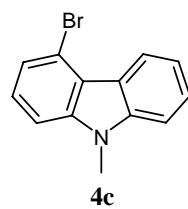

**$^1\text{H}$ -NMR:**

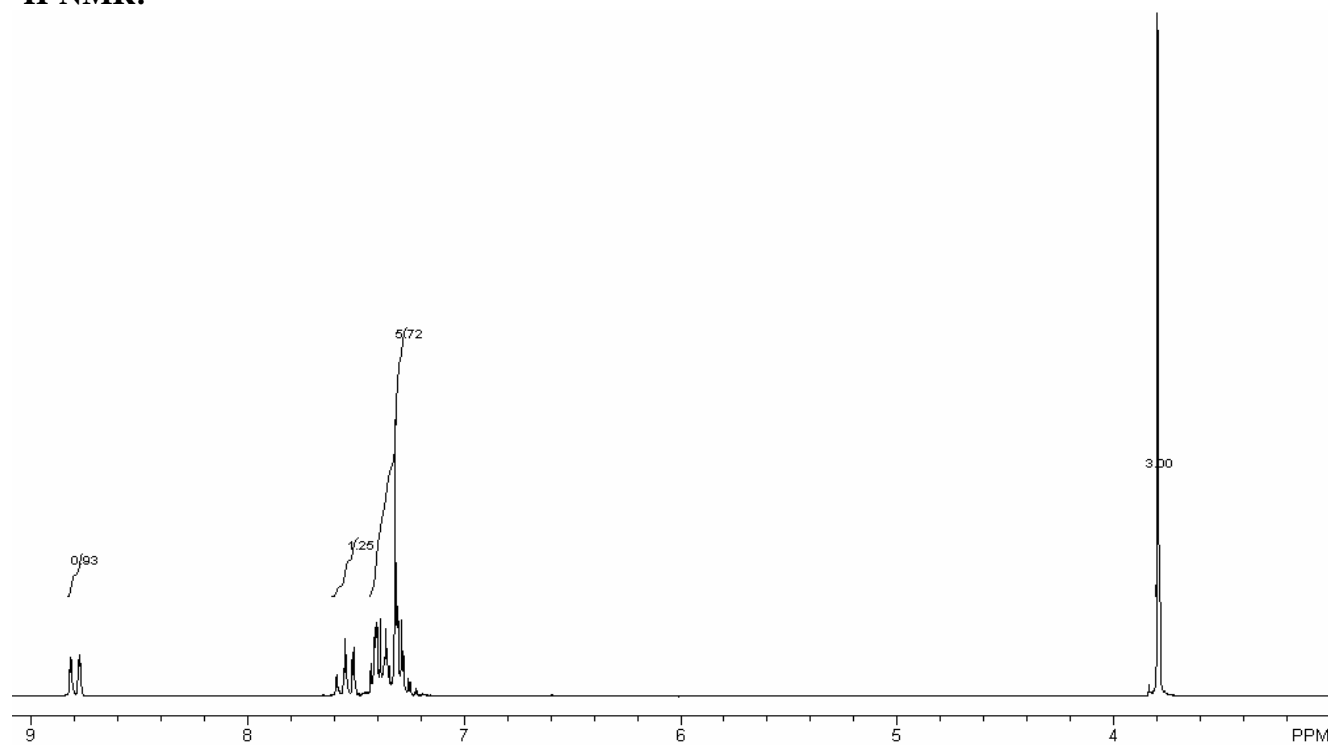

**$^{13}\text{C}$ -NMR:**

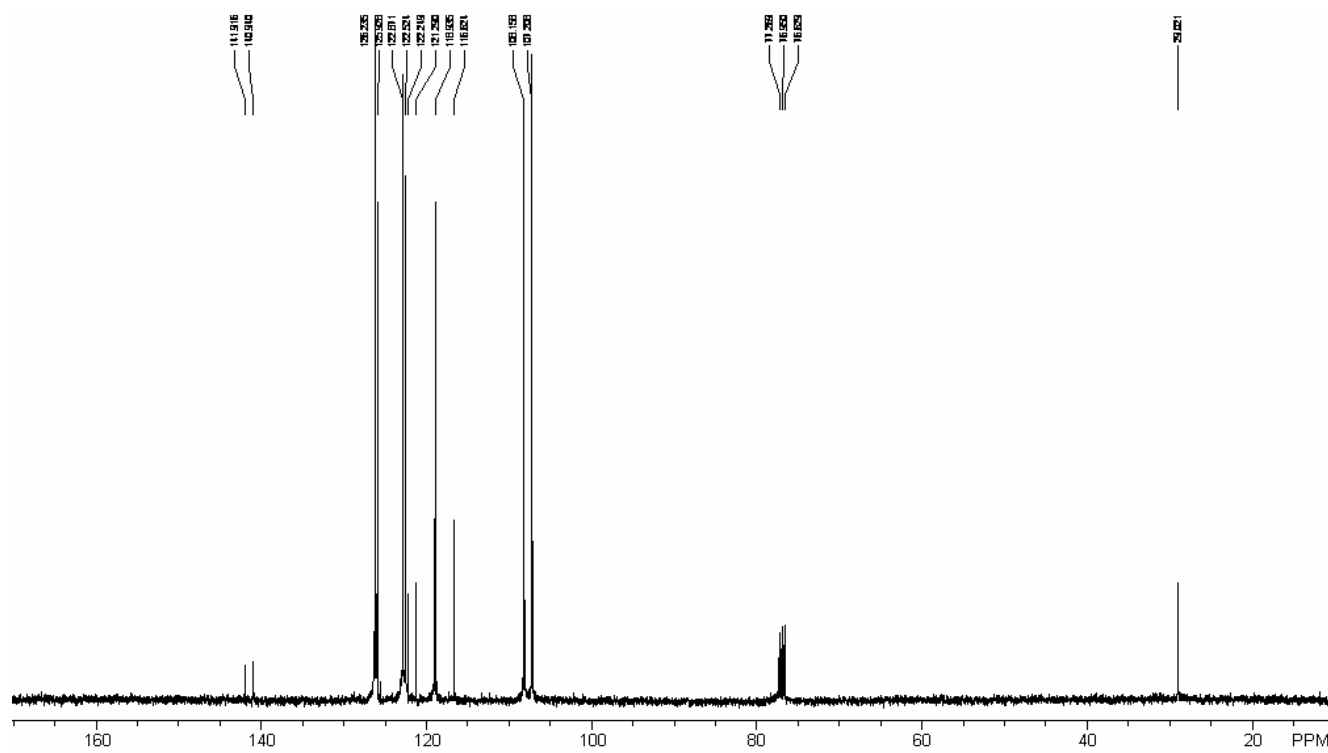

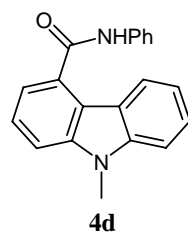

**<sup>1</sup>H-NMR:**

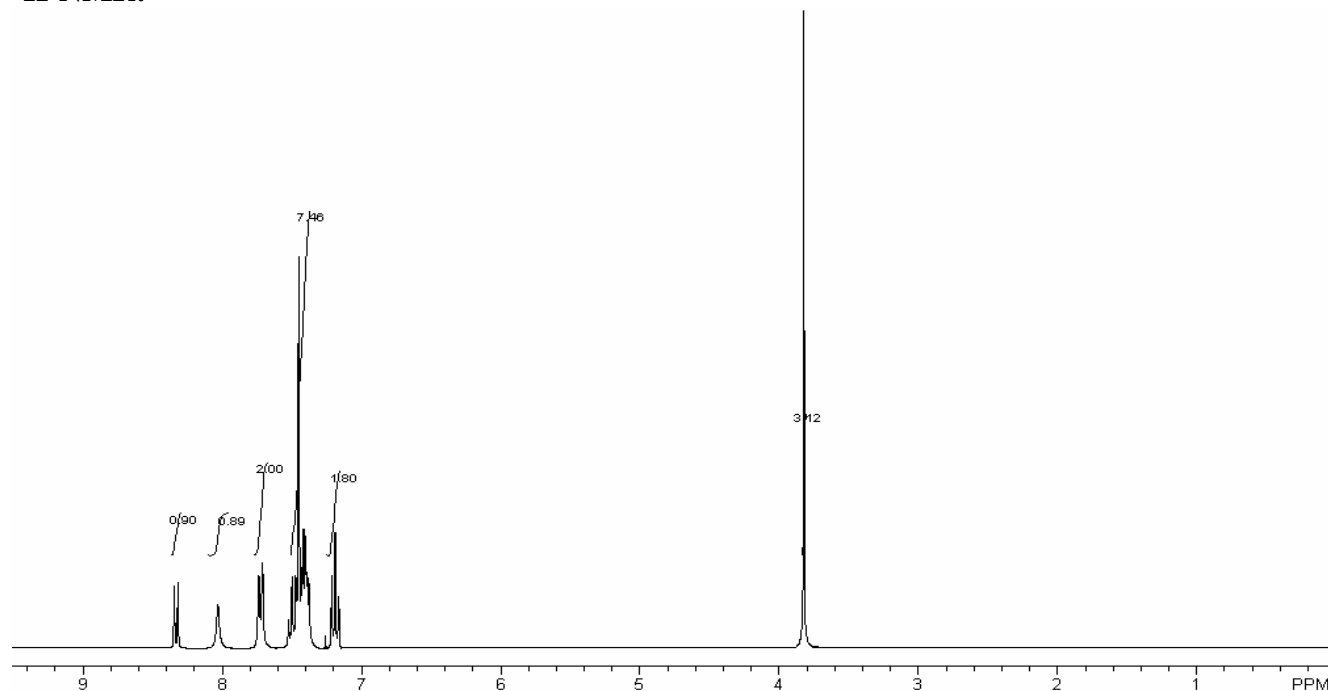

**<sup>13</sup>C-NMR:**

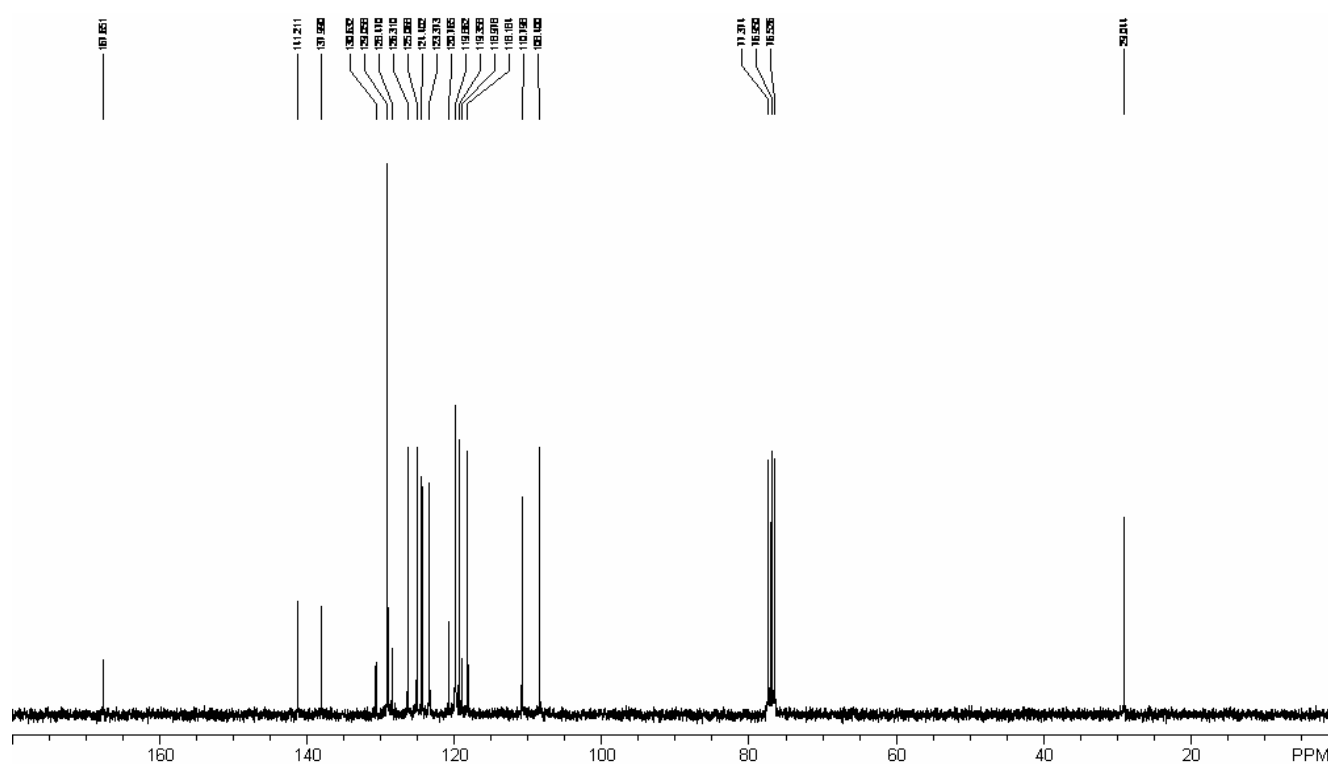

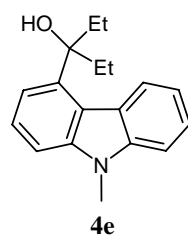

**<sup>1</sup>H-NMR:**

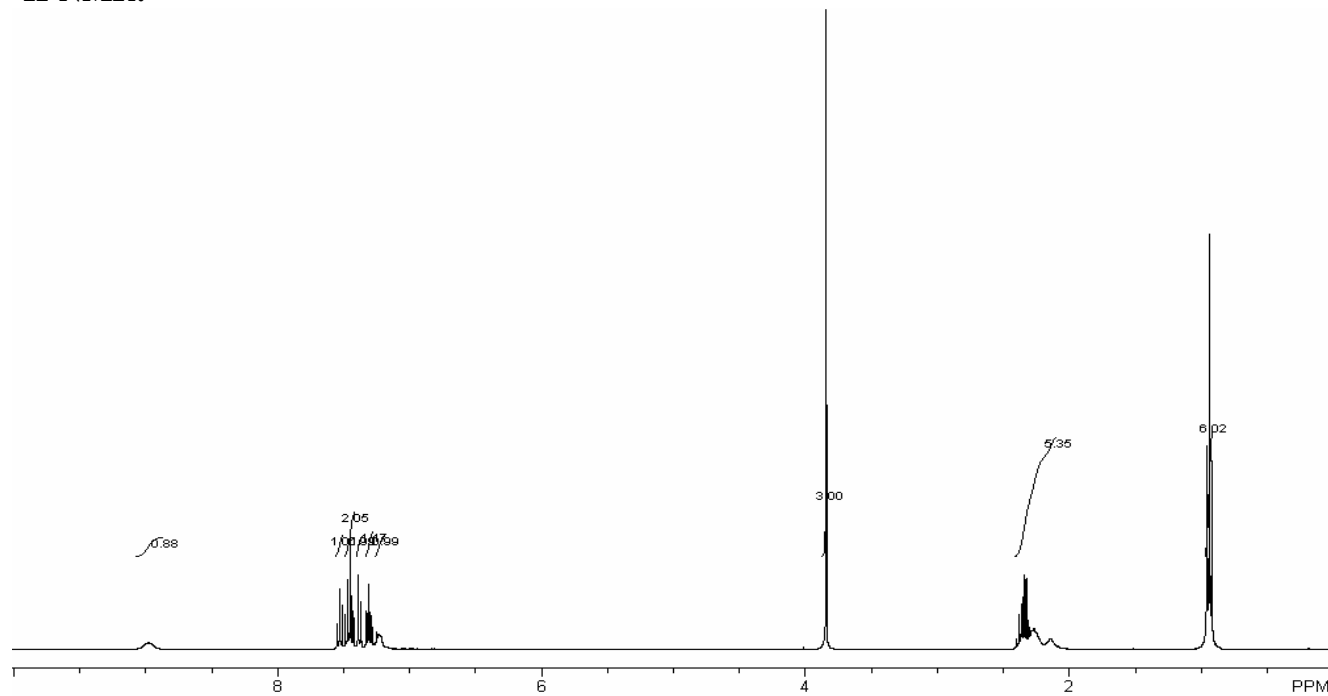

**<sup>13</sup>C-NMR:**

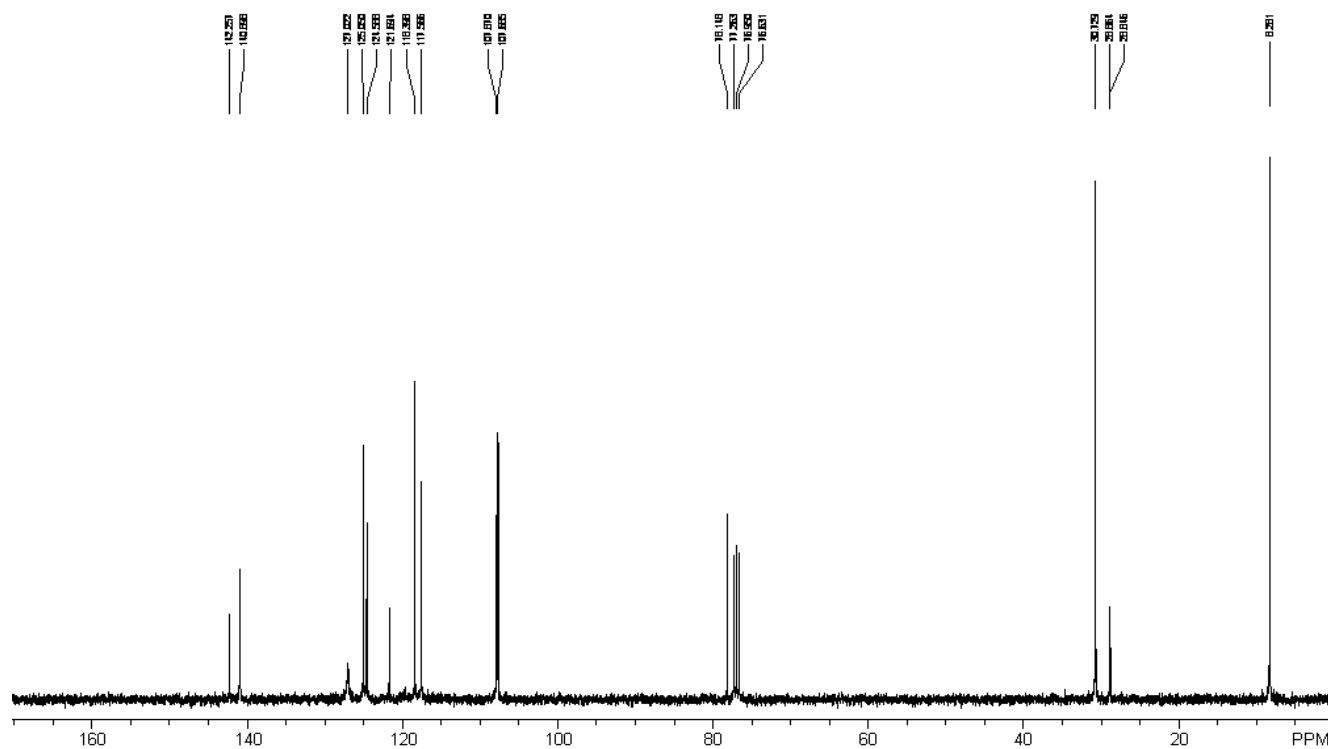

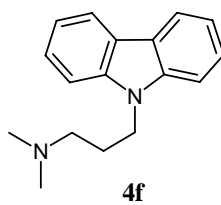

**<sup>1</sup>H-NMR:**

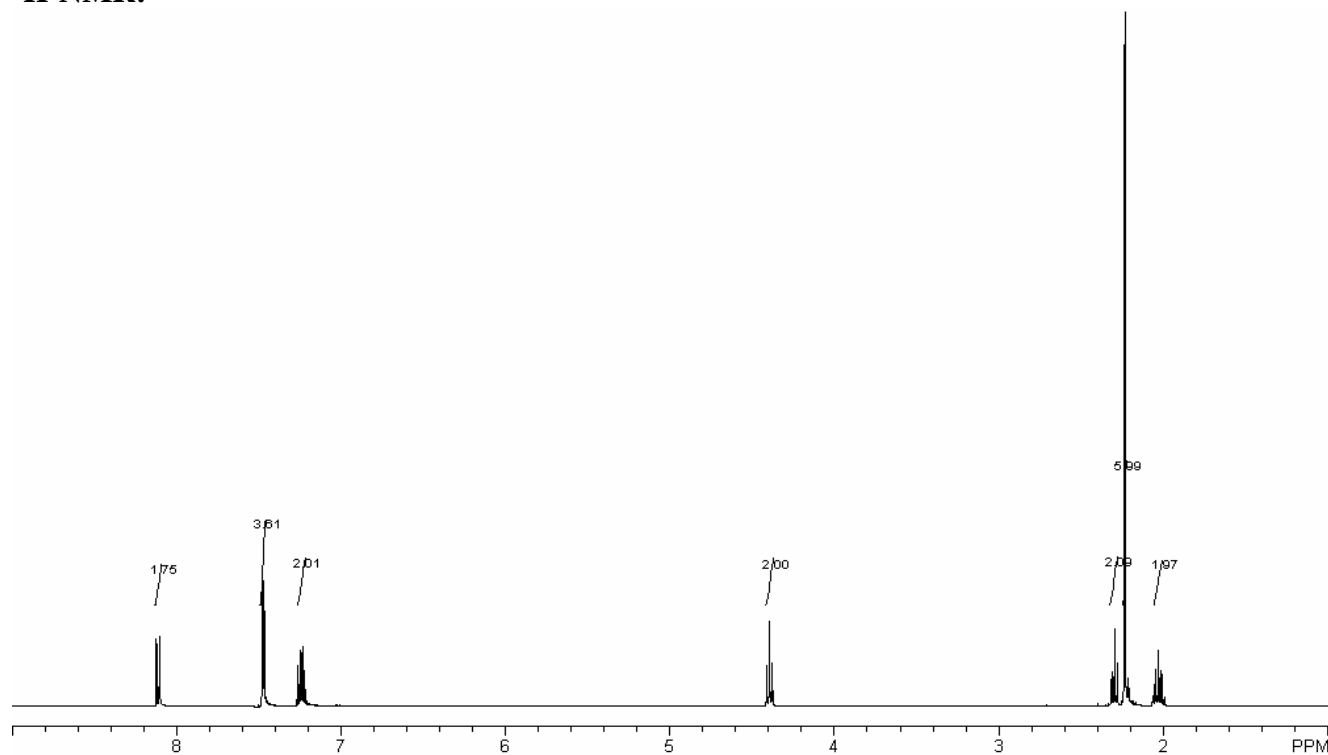

**<sup>13</sup>C-NMR:**

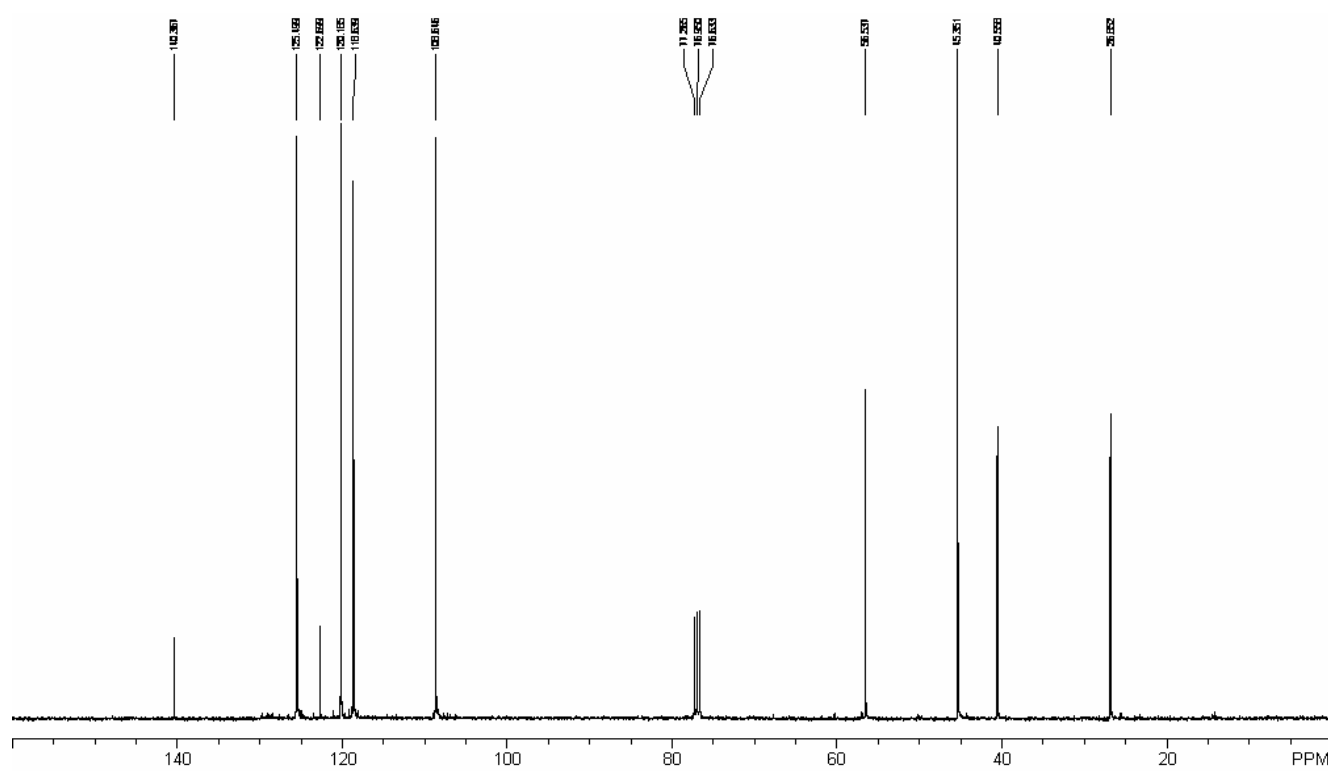

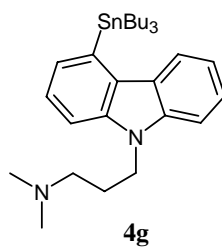

**<sup>1</sup>H-NMR:**

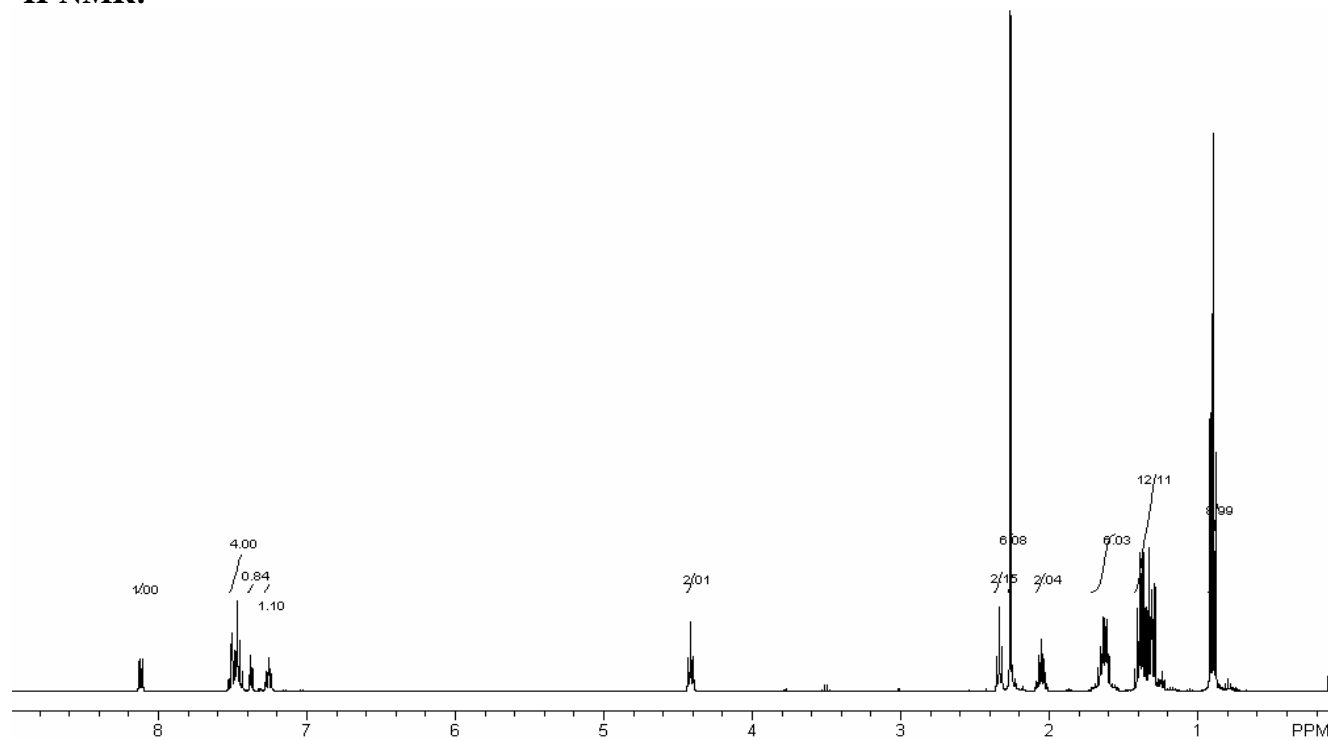

**<sup>13</sup>C-NMR:**

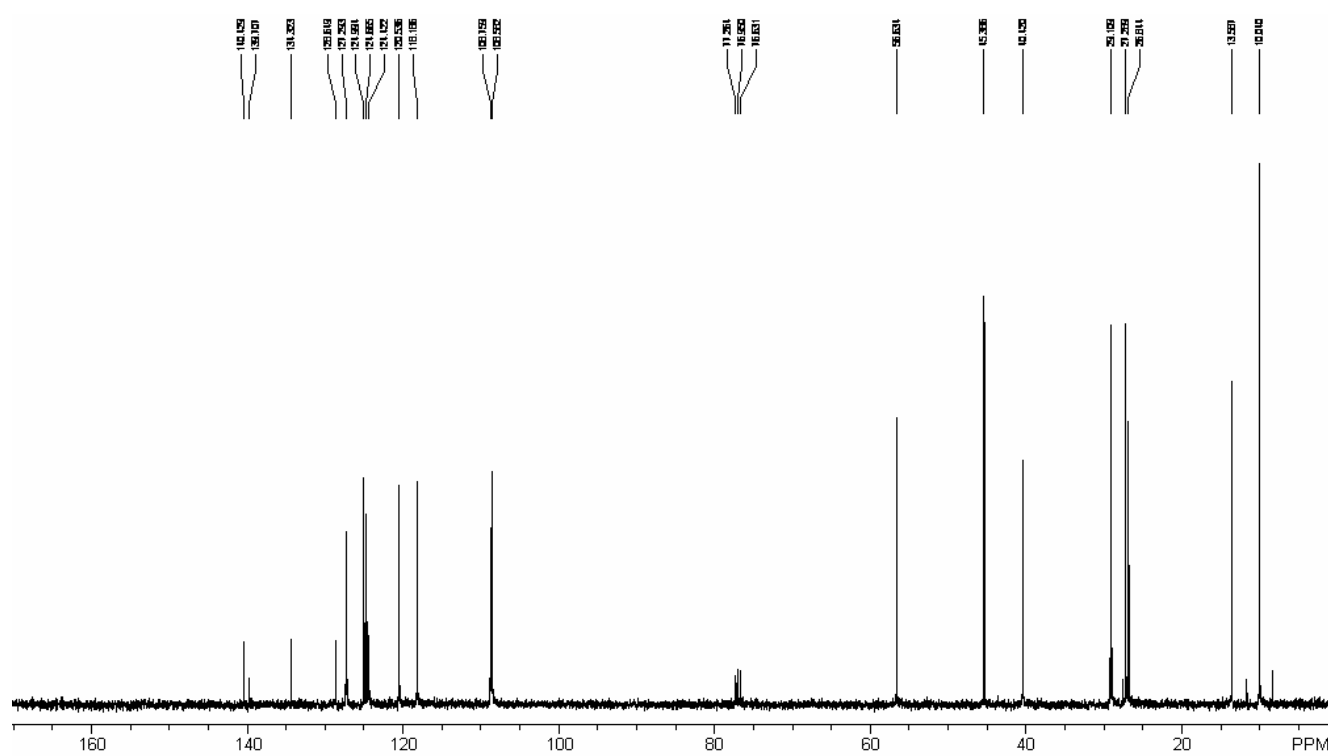

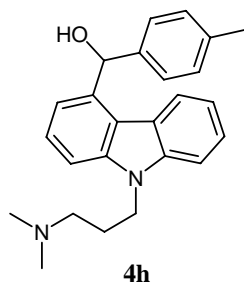

**<sup>1</sup>H-NMR:**

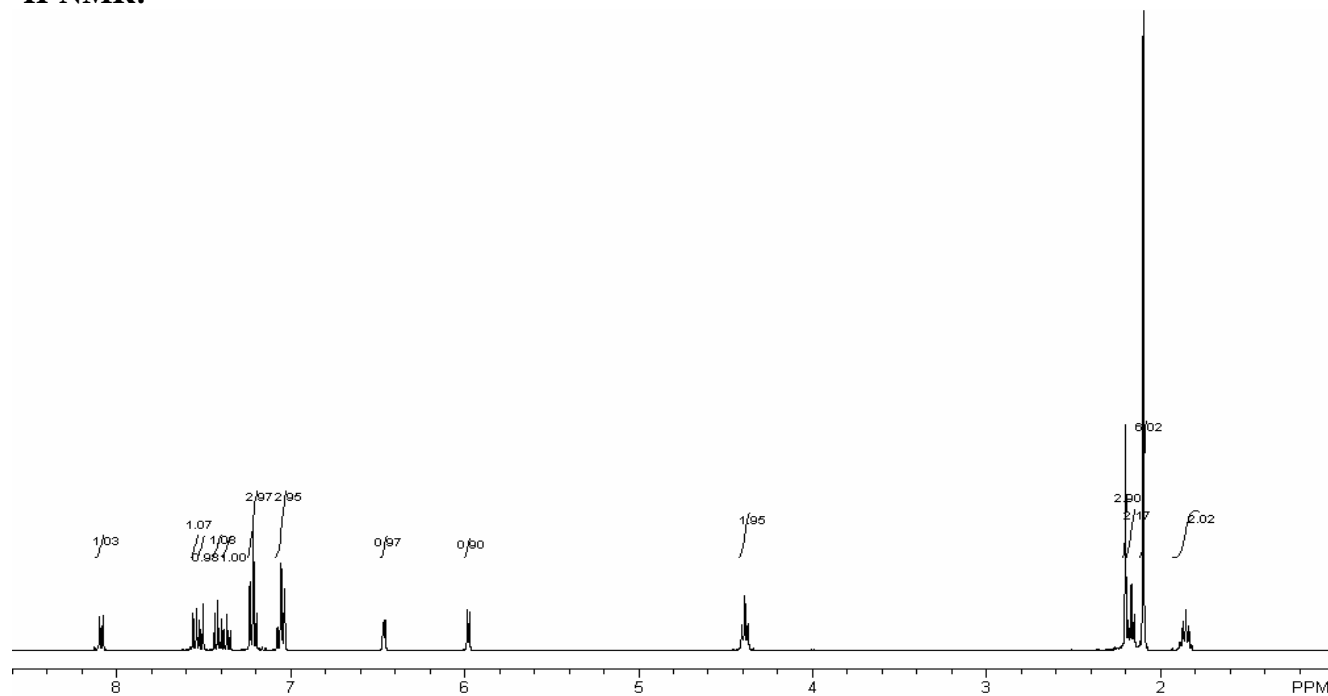

**<sup>13</sup>C-NMR:**

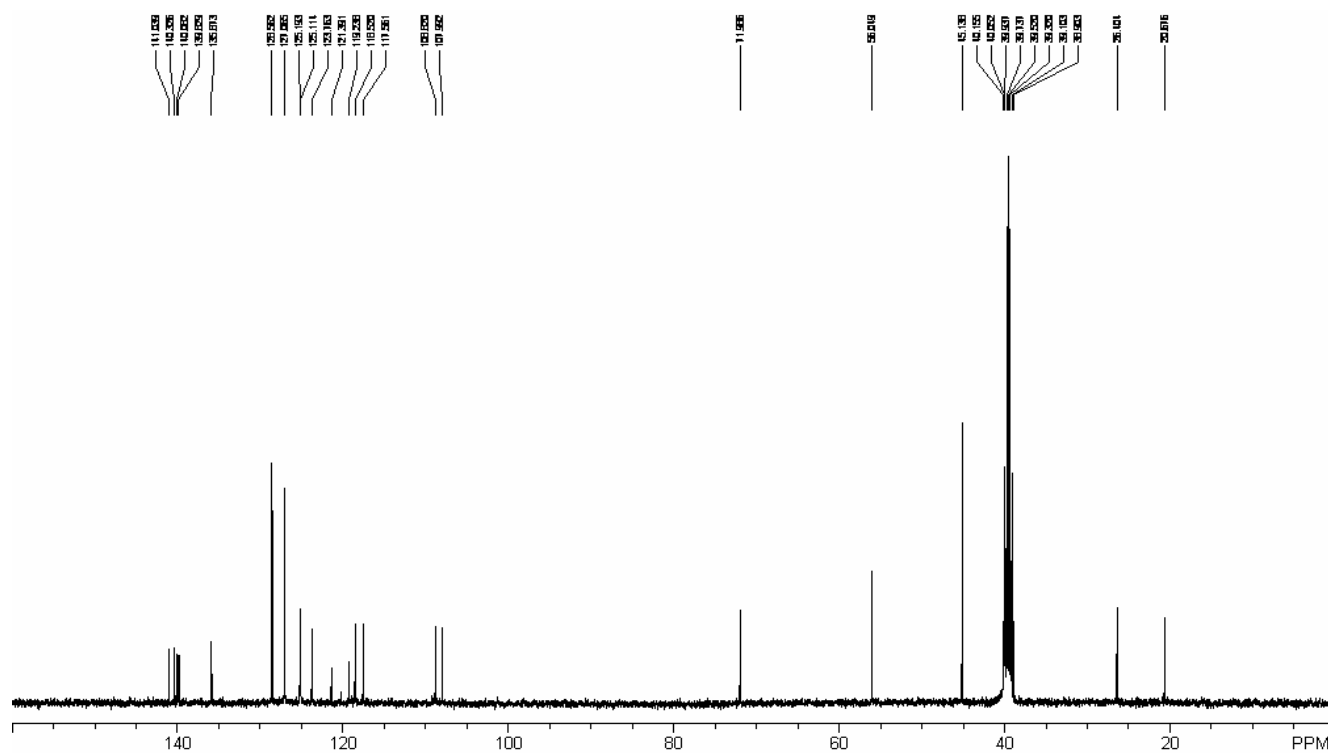

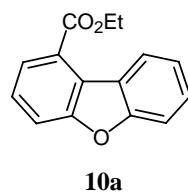

**<sup>1</sup>H-NMR:**

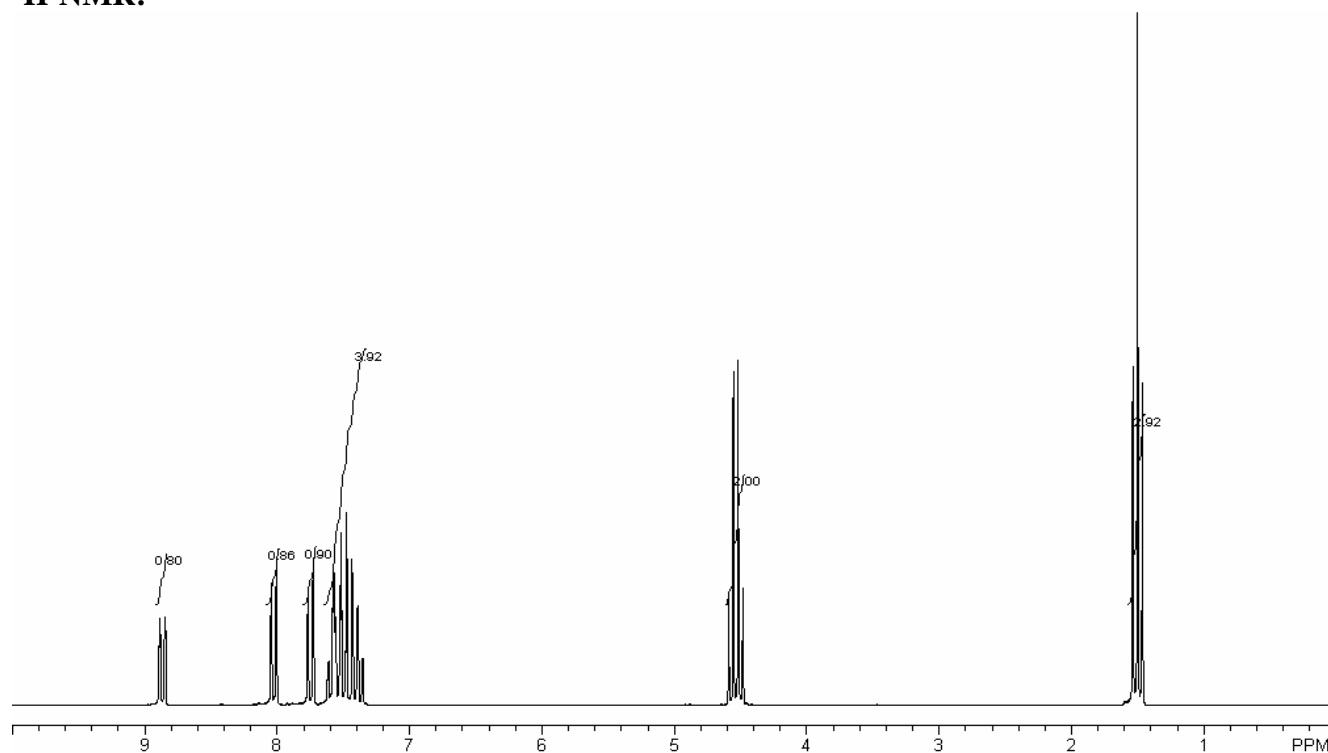

**<sup>13</sup>C-NMR:**

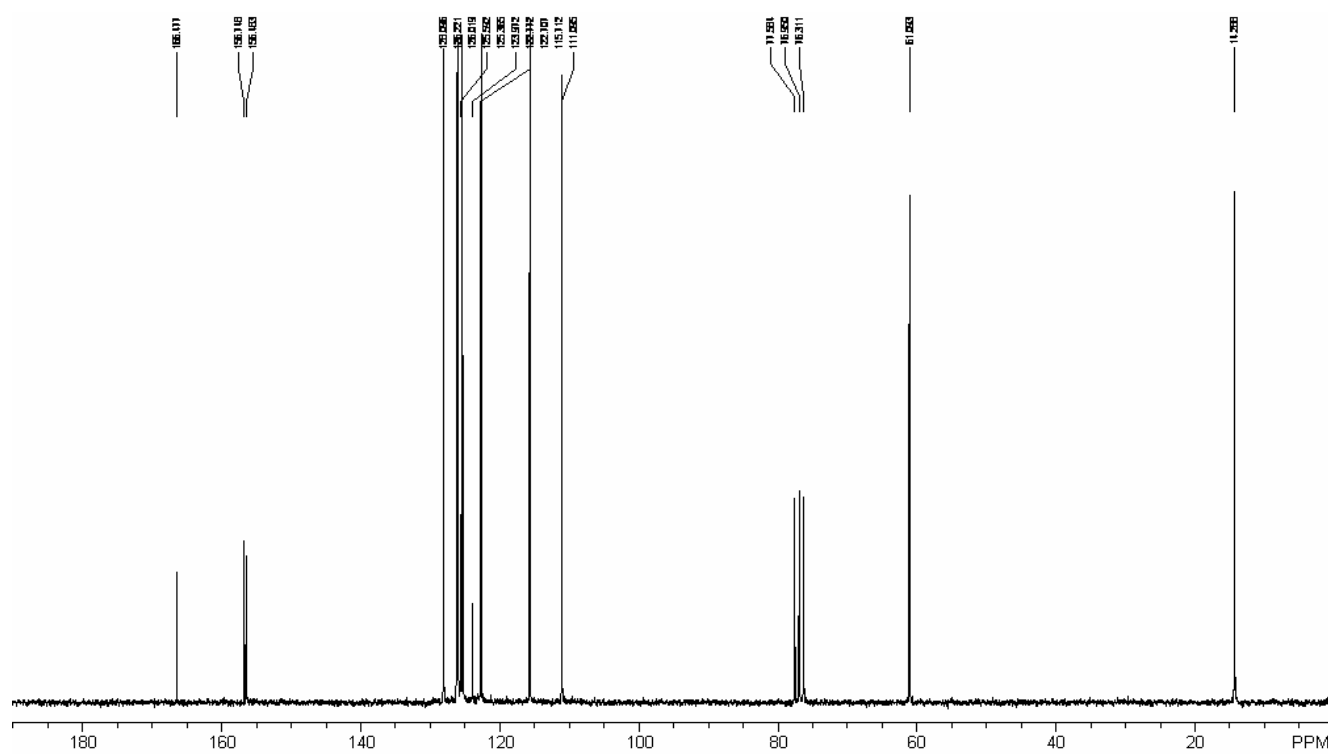

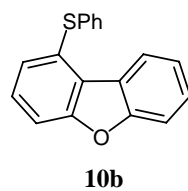

**<sup>1</sup>H-NMR:**

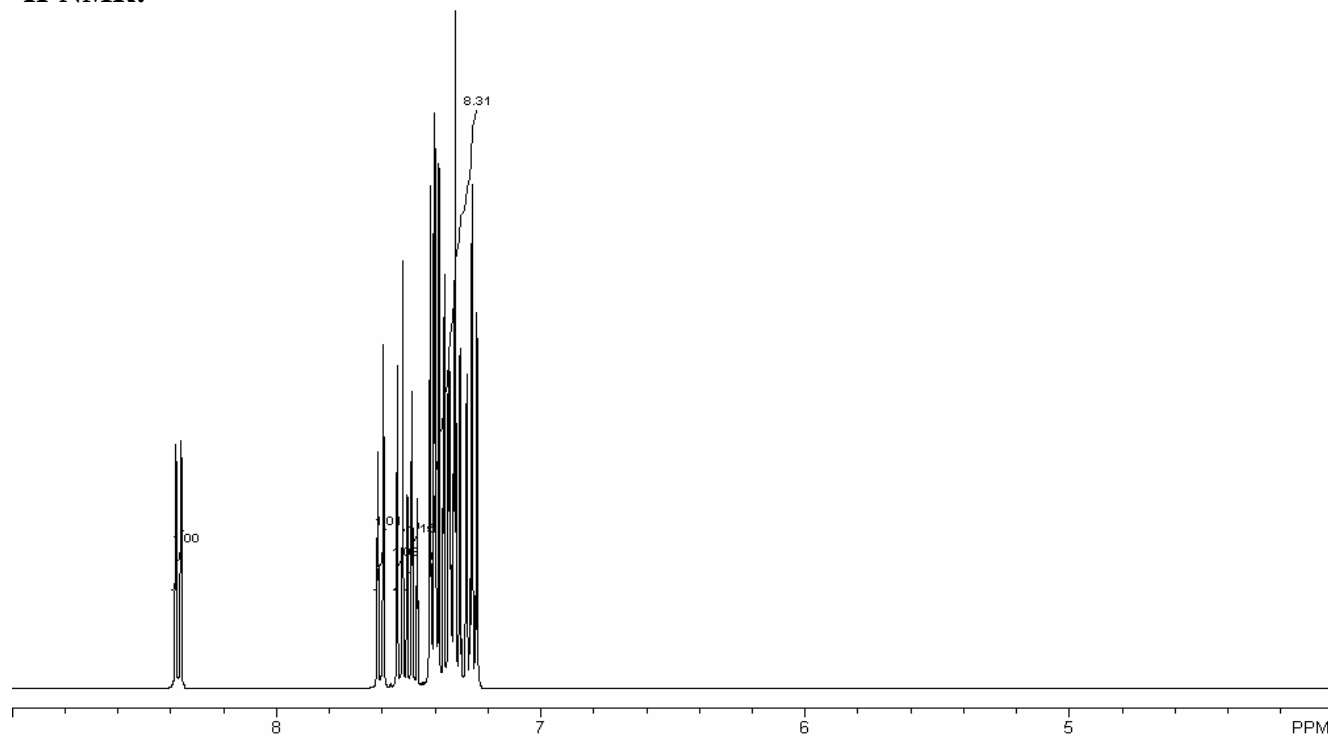

**<sup>13</sup>C-NMR:**

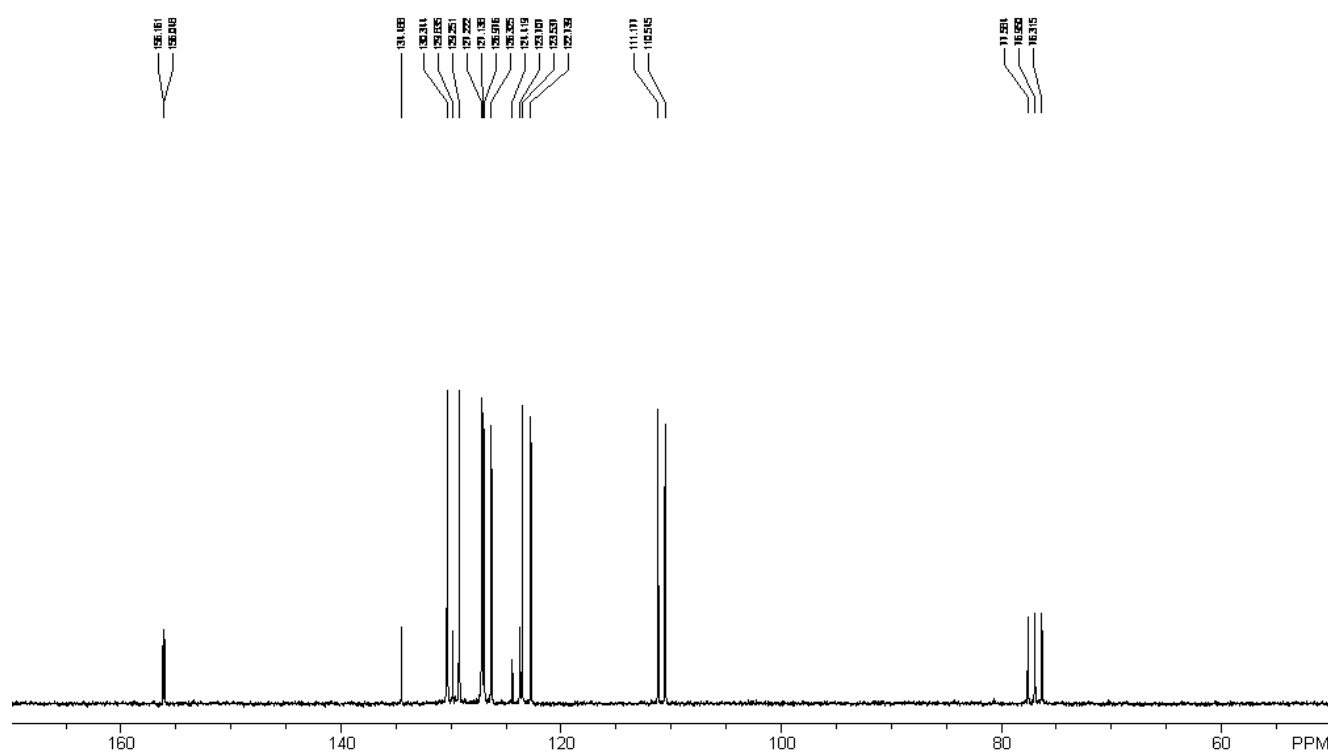



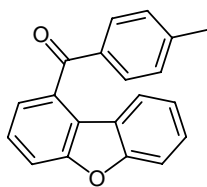

**10c**

**$^1\text{H}$ -NMR:**

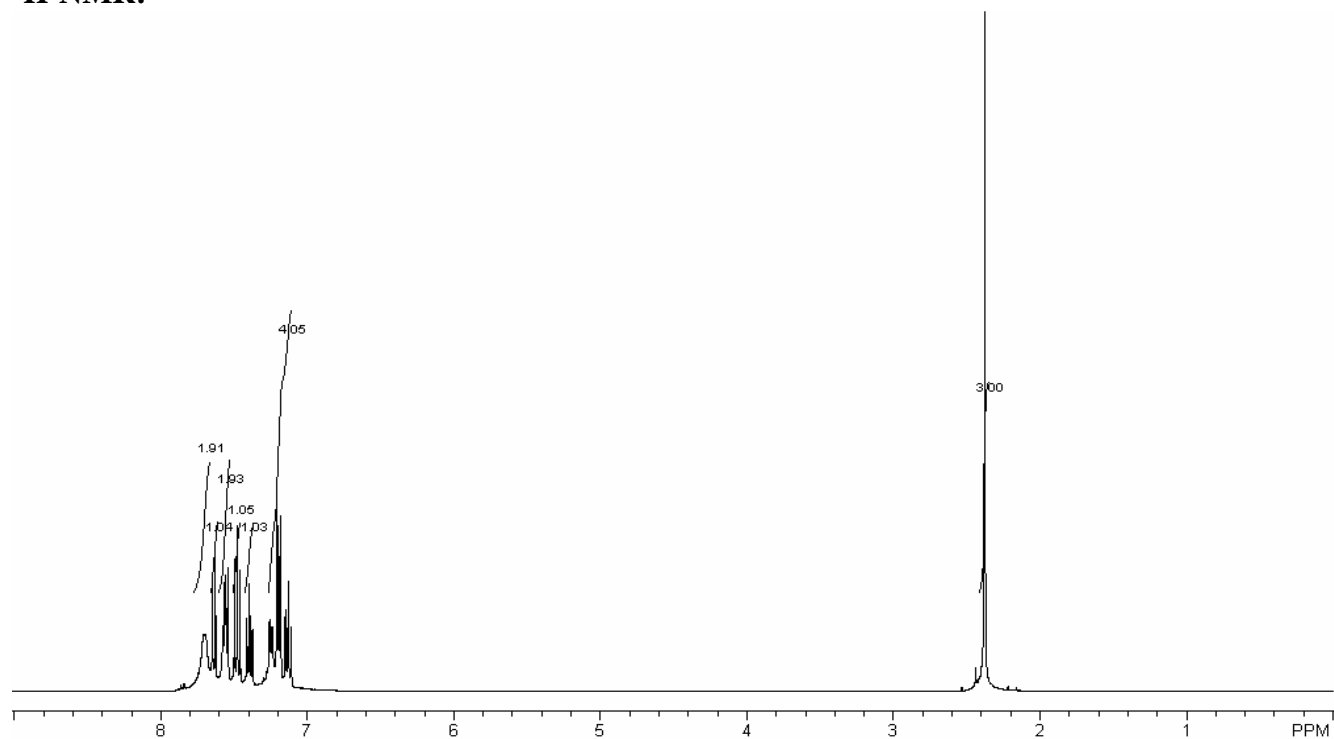

**$^{13}\text{C}$ -NMR:**

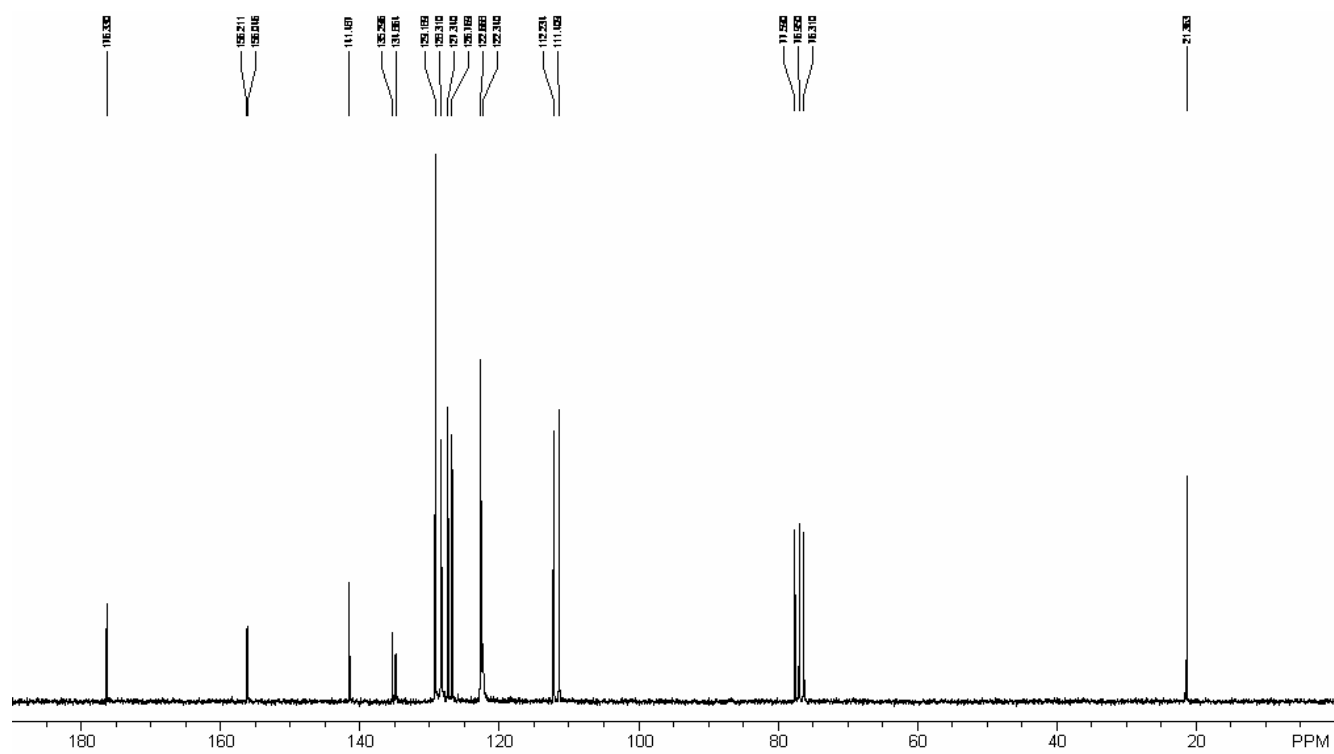

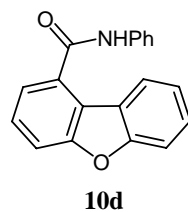

**<sup>1</sup>H-NMR:**

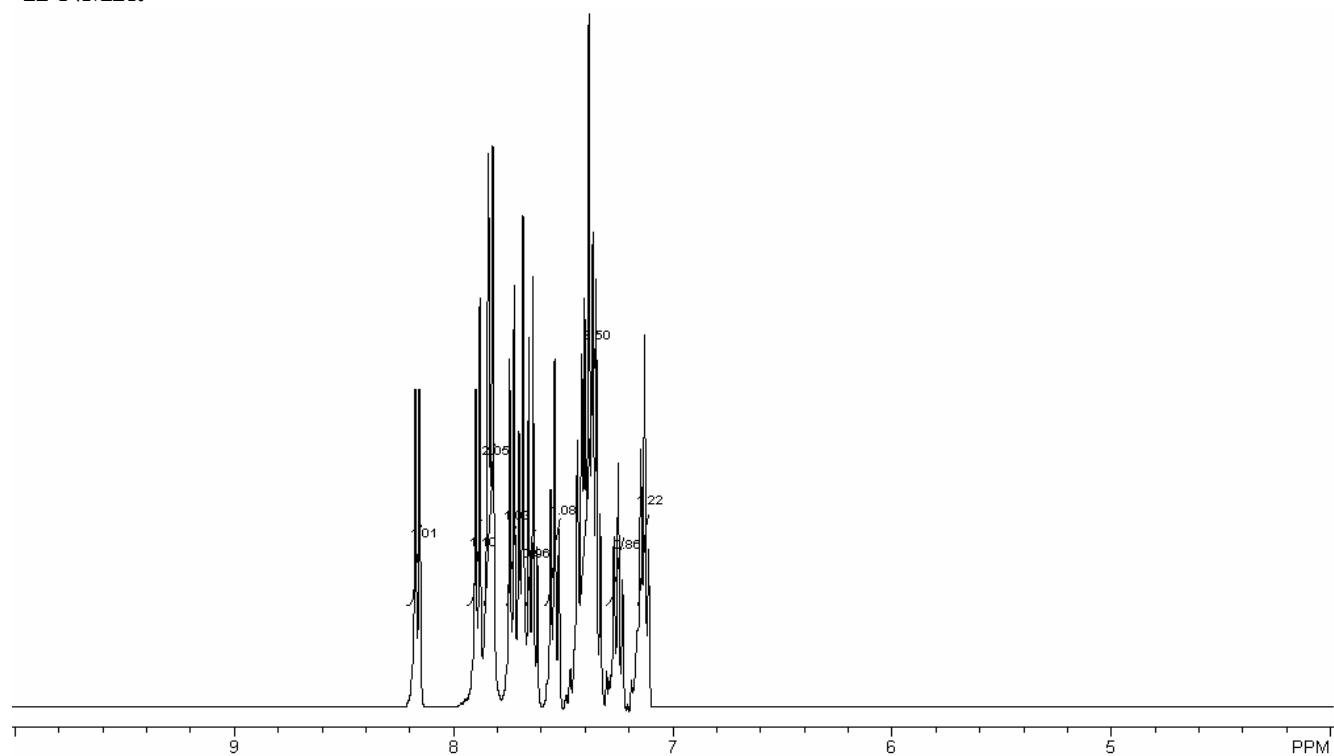

**<sup>13</sup>C-NMR:**

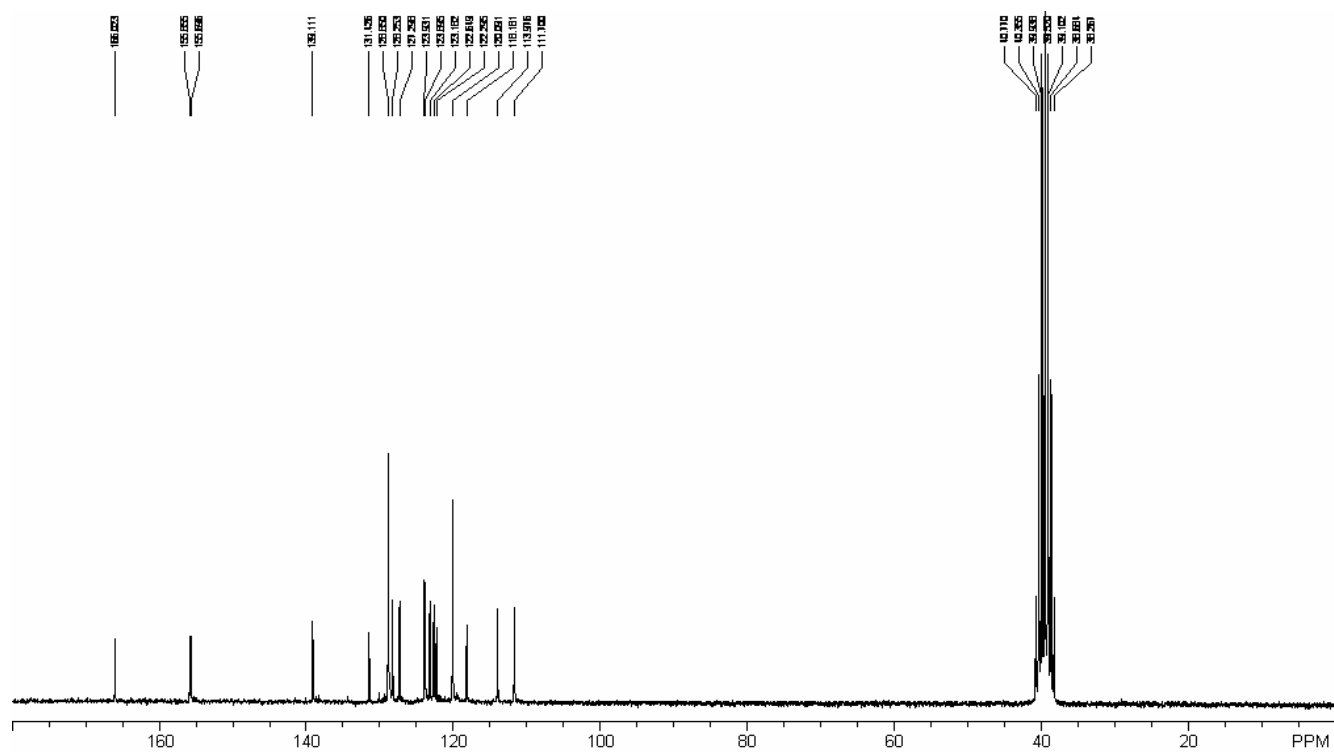

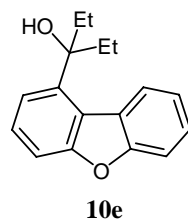

**<sup>1</sup>H-NMR:**

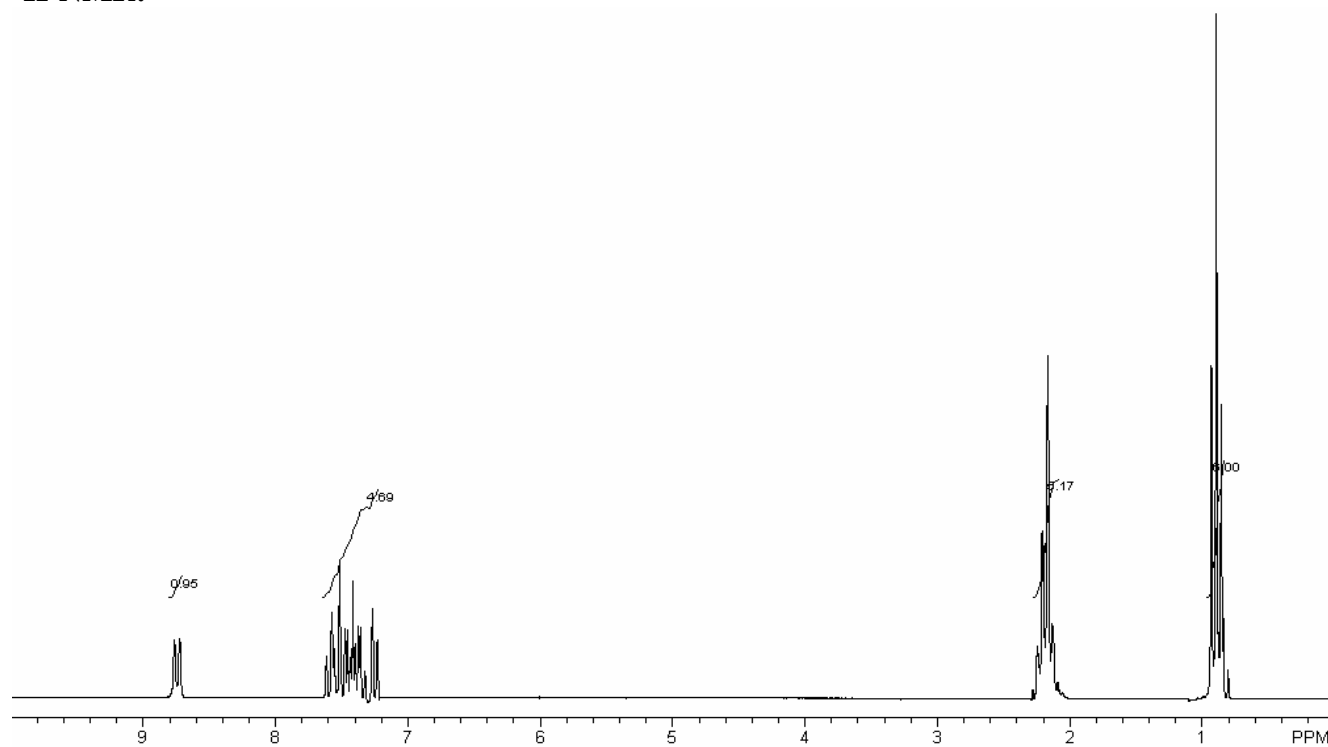

**<sup>13</sup>C-NMR:**

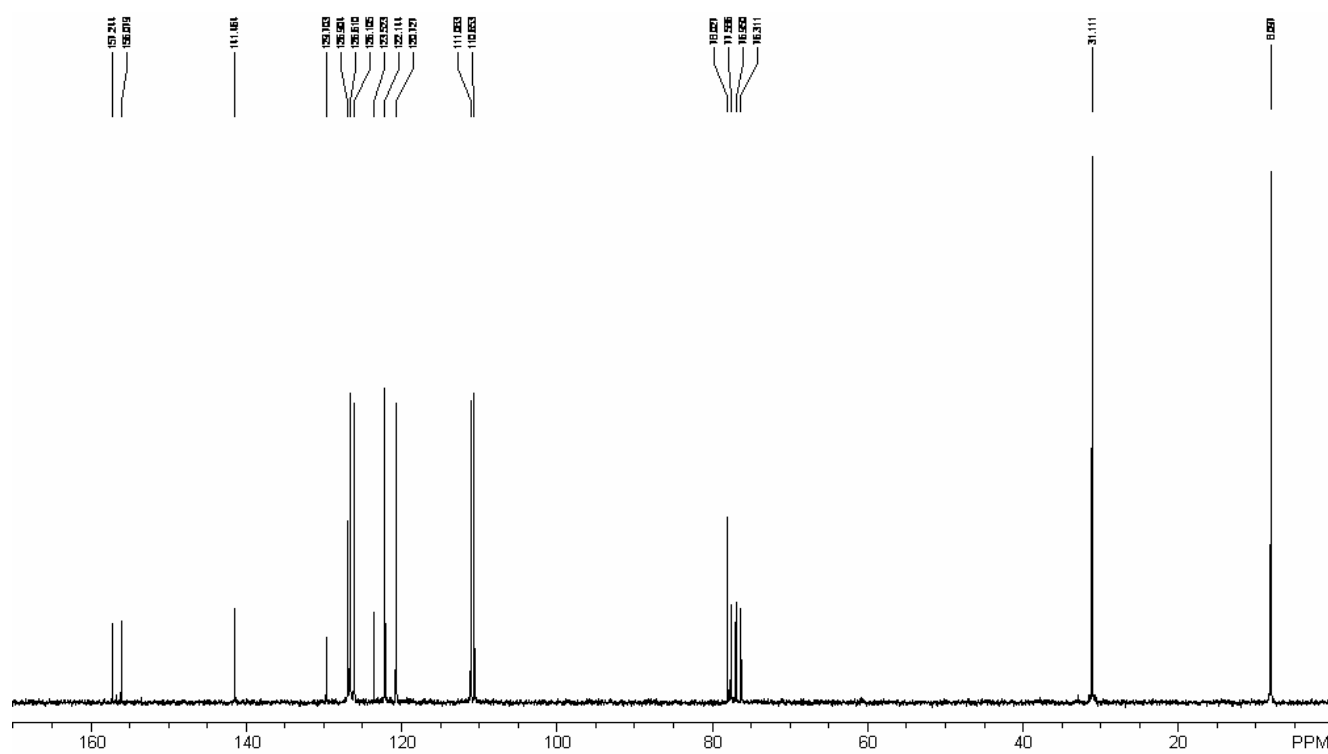

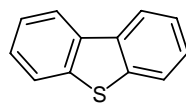

**11a**

**$^1\text{H}$ -NMR:**

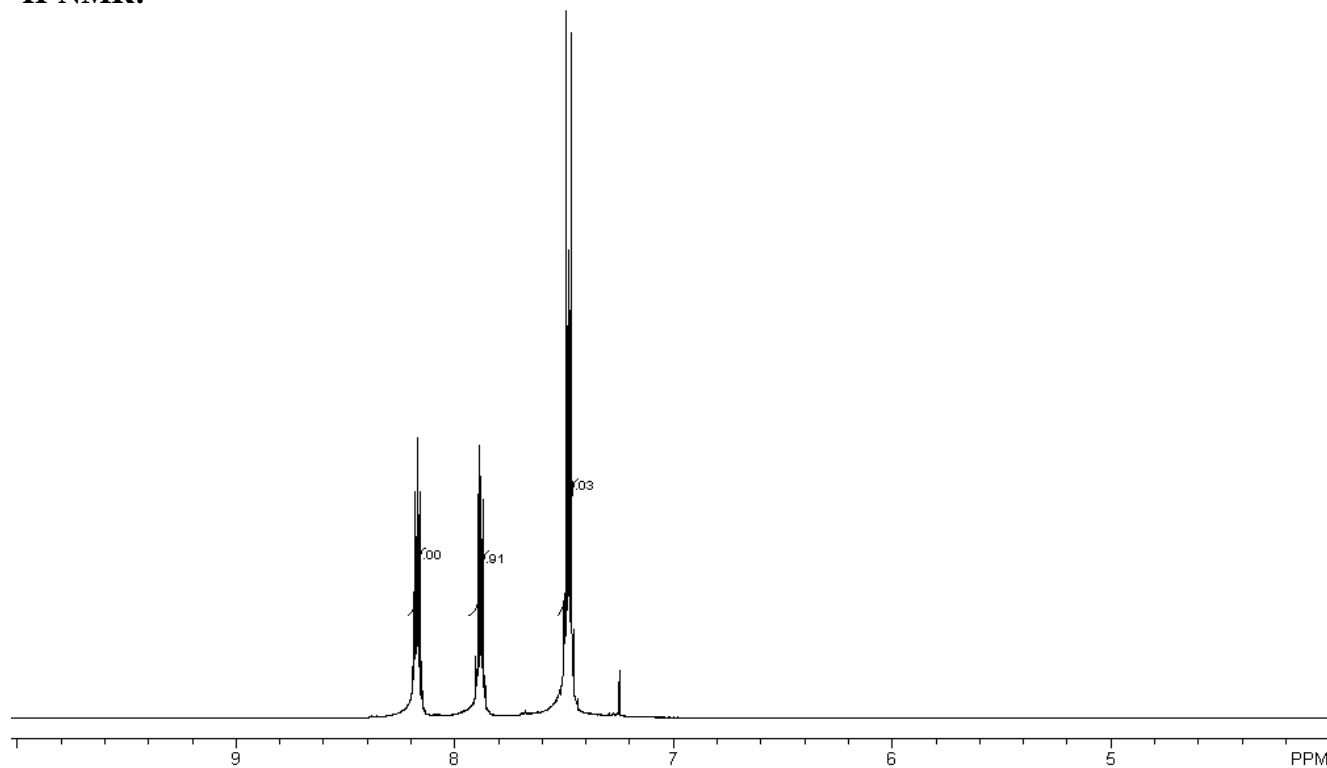

**$^{13}\text{C}$ -NMR:**

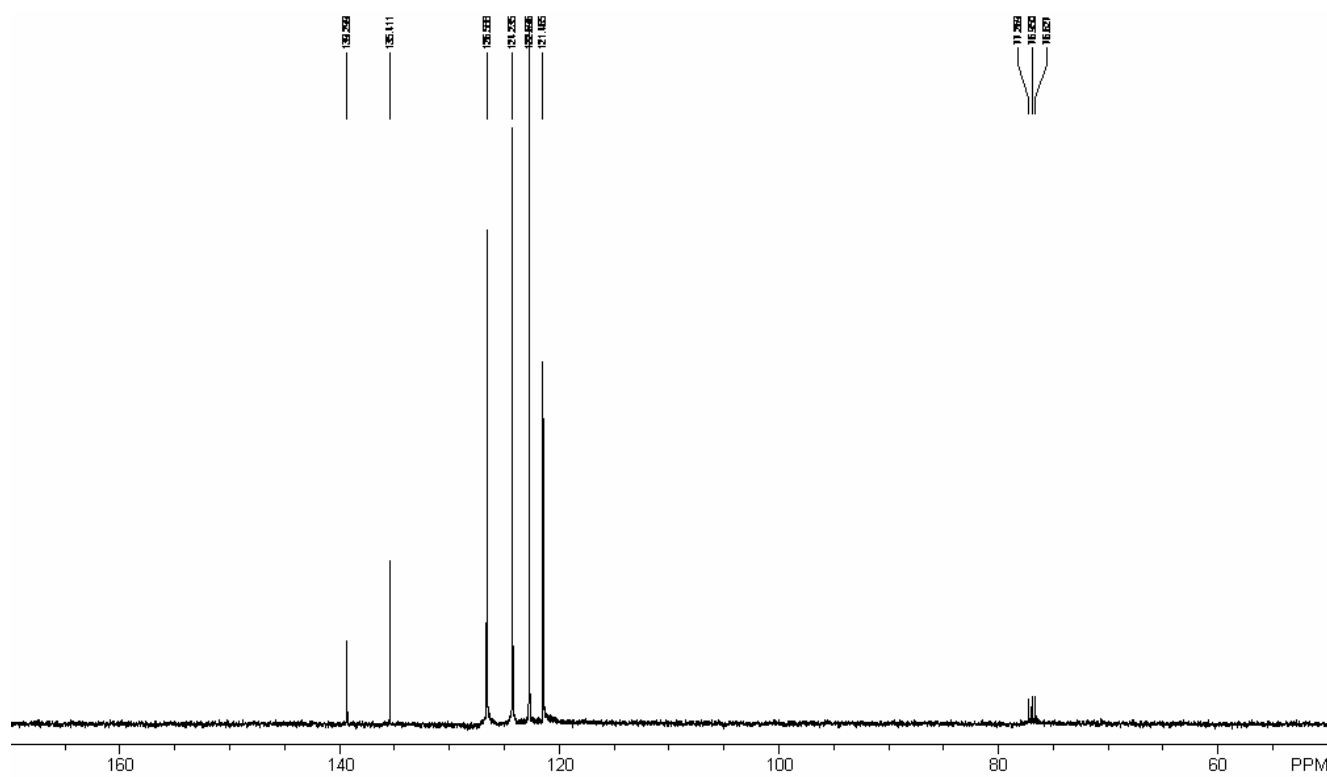

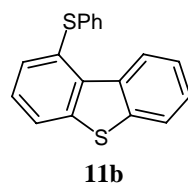

**<sup>1</sup>H-NMR:**

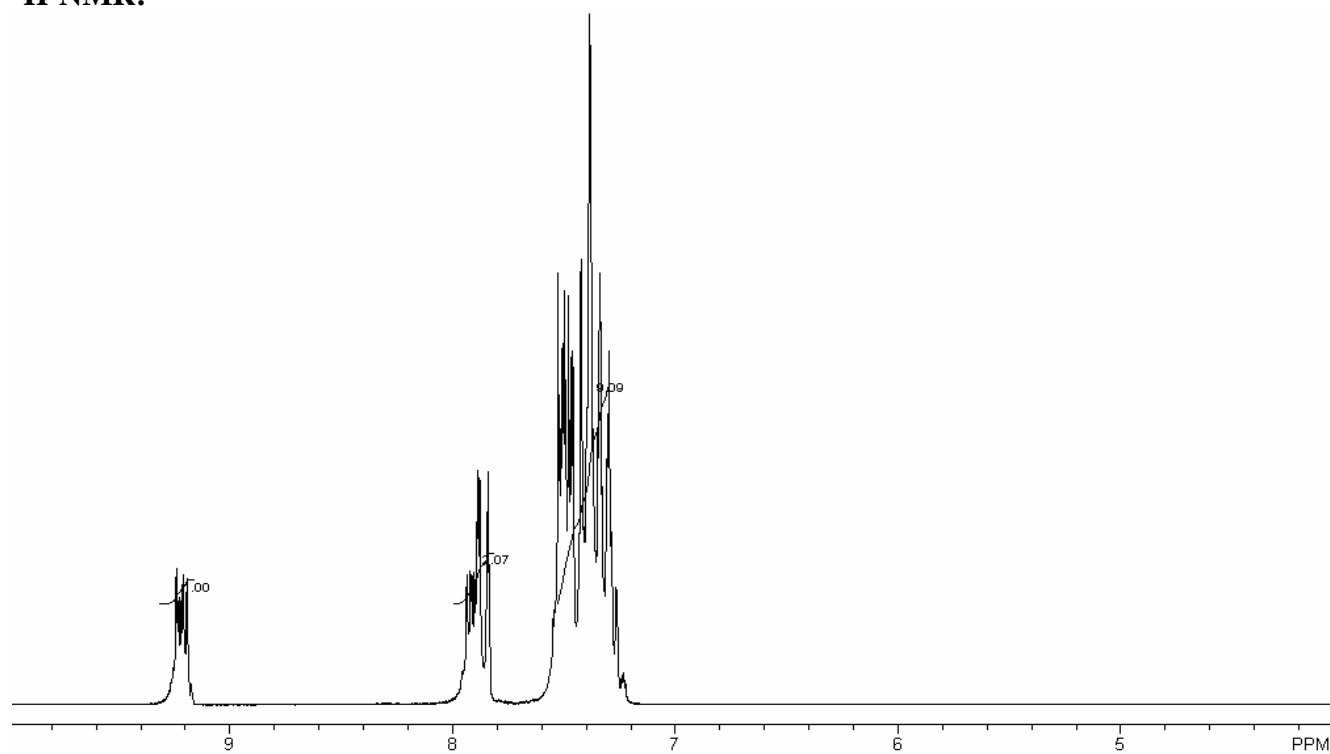

**<sup>13</sup>C-NMR:**

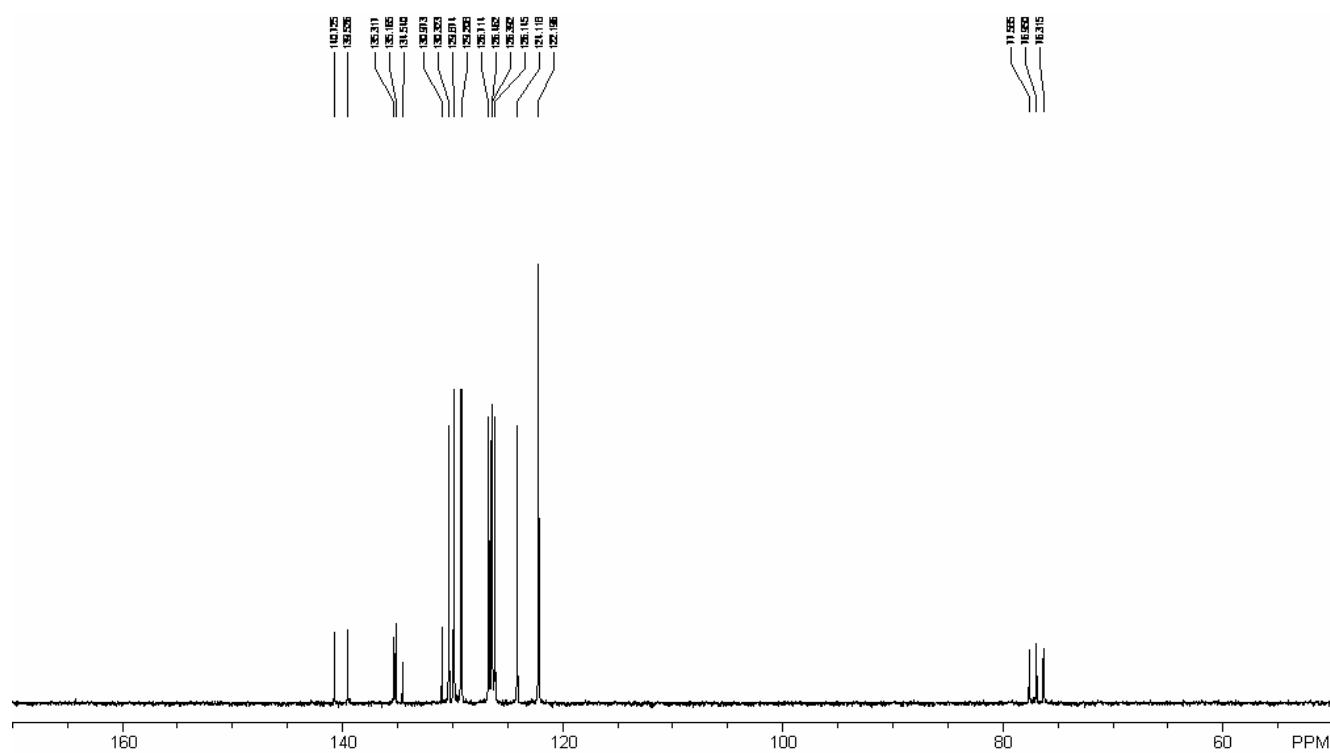

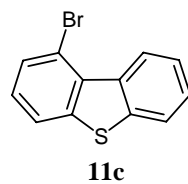

**$^1\text{H}$ -NMR:**

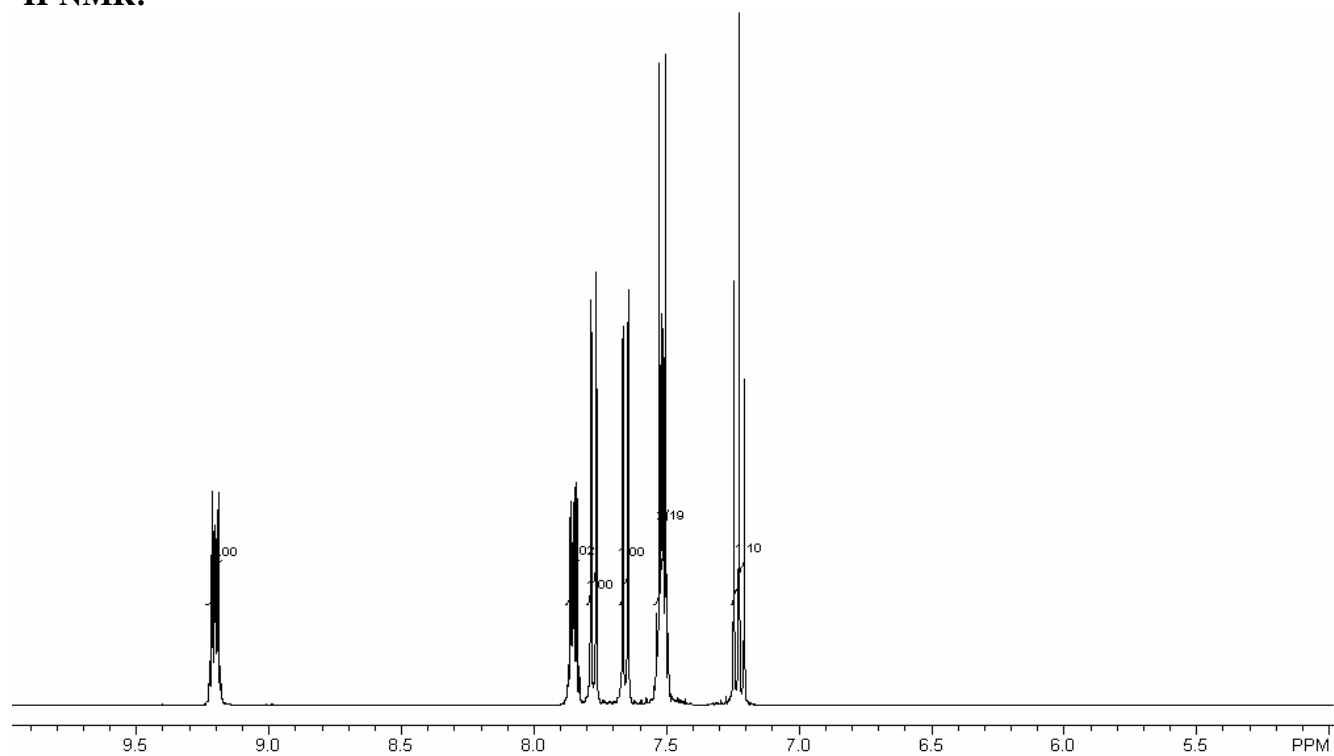

**$^{13}\text{C}$ -NMR:**

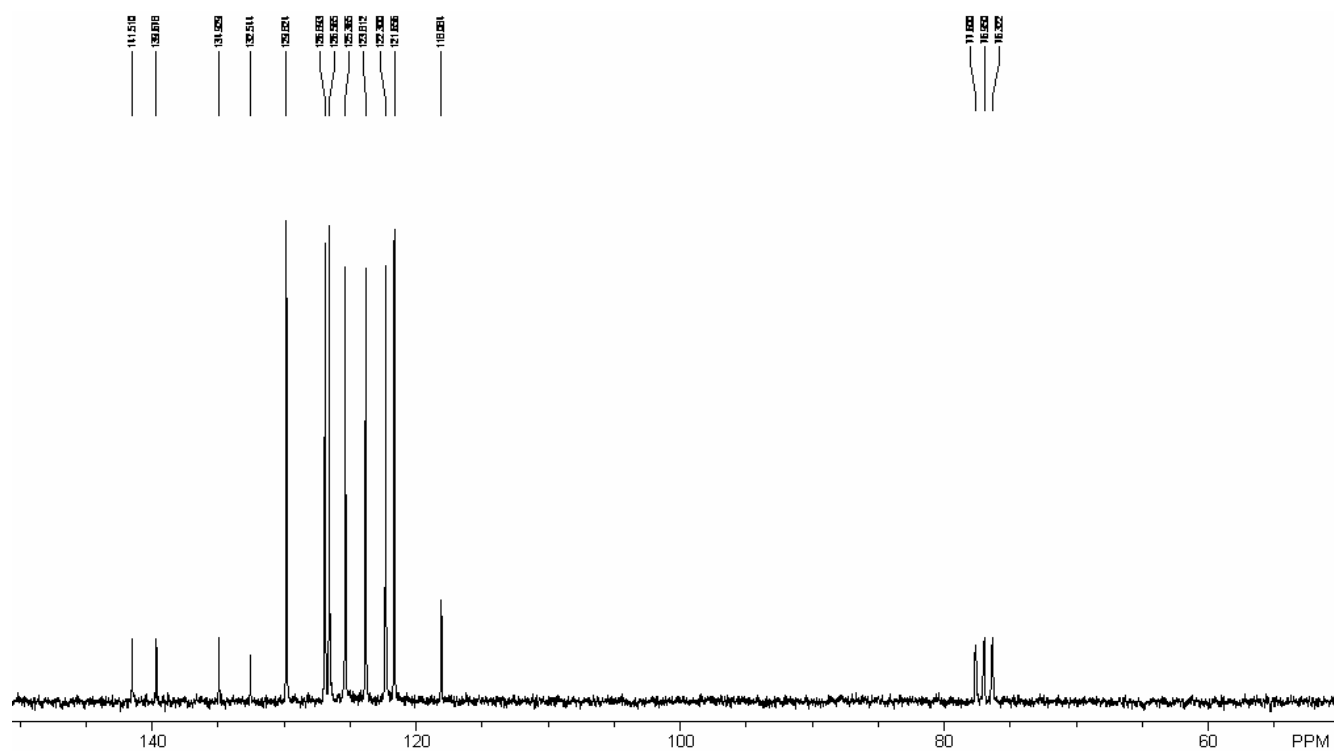

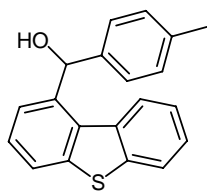

**11d**

**$^1\text{H}$ -NMR:**

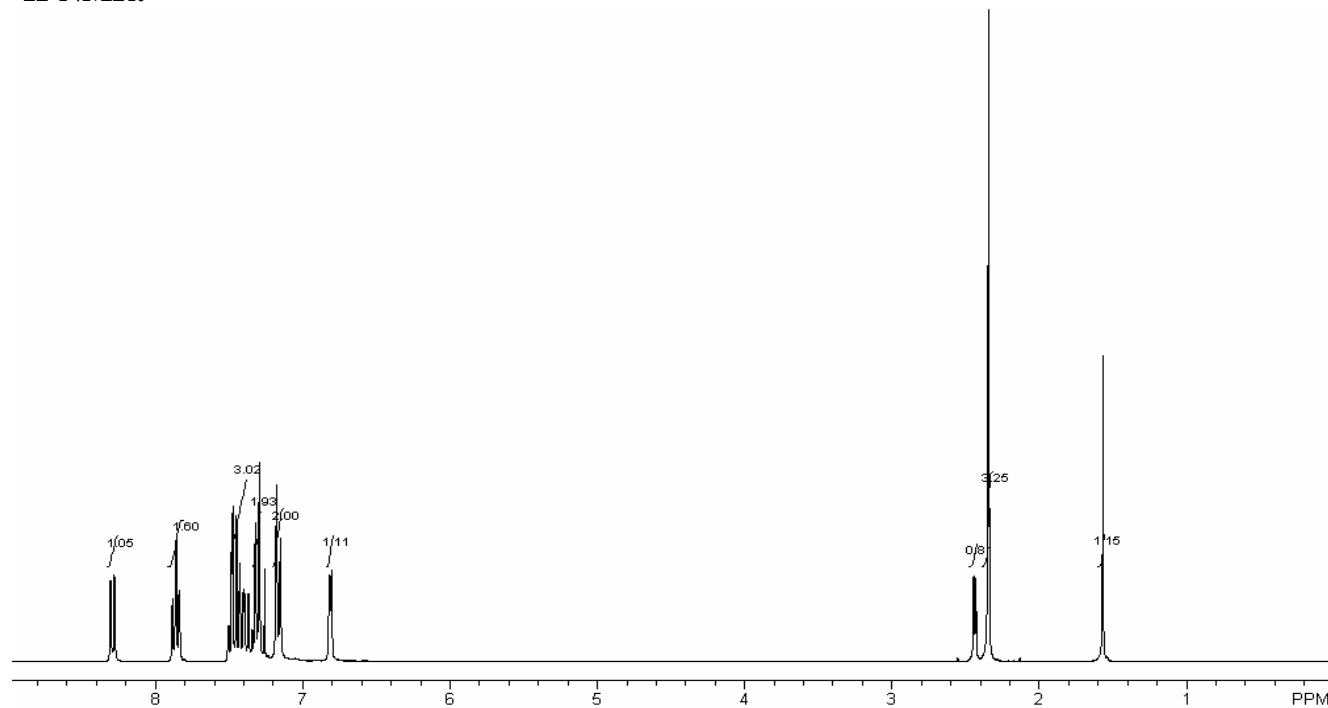

**$^{13}\text{C}$ -NMR:**

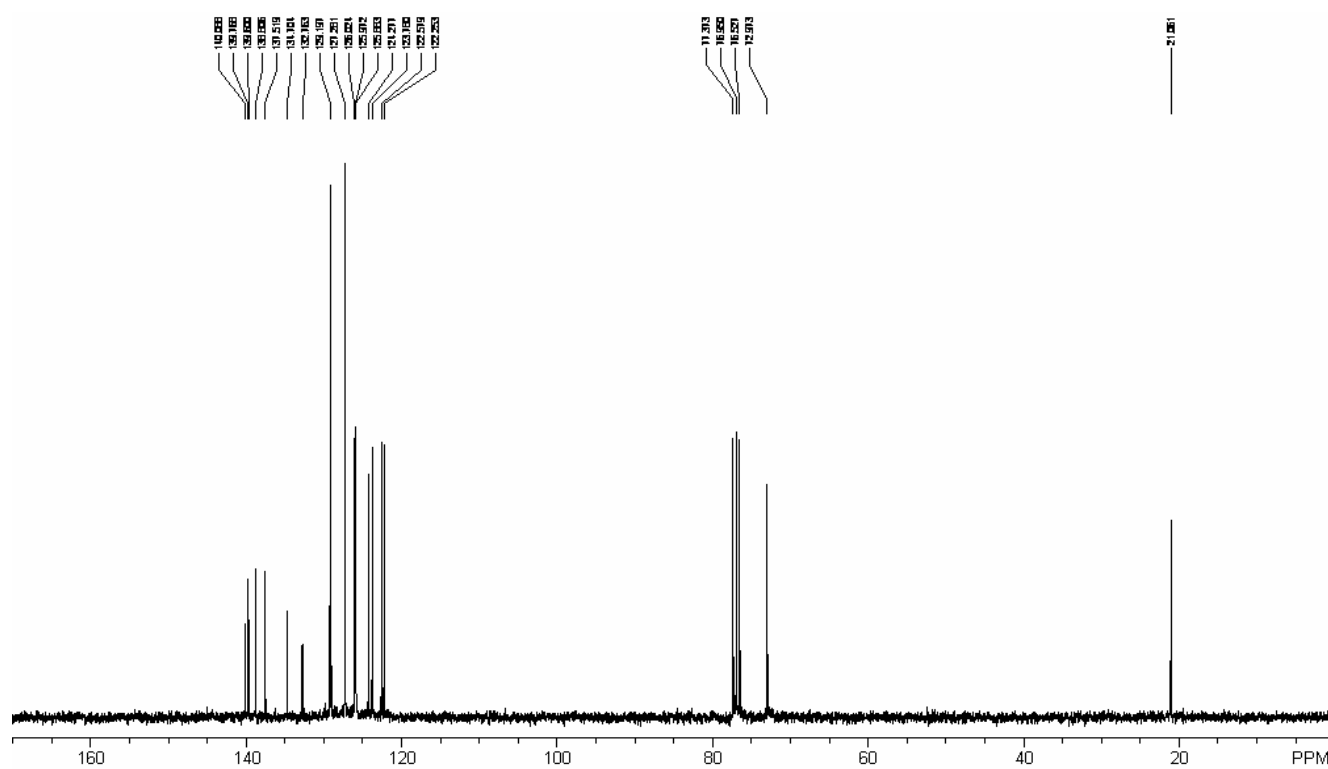

## REFERENCES.

- (1) Wolfe, J. P.; Buchwald, S. L. *J. Org. Chem.* **2000**, *65*, 1144-1157.
- (2) He, Y.; Zhao, H.; Pan, X.; Wang, S. *Synth. Commun.* **1989**, *19*, 3047-3050.
- (3) Commercially available from Sigma-Aldrich.
- (4) Sindelar, K.; Holubek, J.; Schlanger, J.; Dlabac, A.; Valchar, M. Protiva, M. *Collect. Czech. Chem. Commun.* **1985**, *50*, 503-509.
- (5) Shibatta, N.; Das, B. K.; Harada, K.; Takeuchi, Y.; Bando, M. *Synlett* **2001**, 1755-1758.
- (6) Scott, T. L.; Söderberg, B. C. G. *Tetrahedron* **2003**, *59*, 6323-6332.
- (7) *Dictionary of Organic Compounds*; 5<sup>th</sup> Ed., Chapman and Hall: New York, 1982; Vol. 4, pp. 3784.
- (8) Schmolka, S. J.; Zimmer, H. *Synthesis* **1984**, 29-31.
- (9) Ashby, J.; Ayad, M.; Meth-Cohn, O. *J. Chem. Soc., Perkin Trans. 1* **1974**, 1744-1747.
- (10) Furukawa, N.; Kimura, T.; Horie, Y.; Ogawa, S. *Heterocycles* **1991**, *32*, 675-678.
- (11) Johnson, J.; Elslager, E. F.; Werbel, L. M. *J. Heterocycl. Chem.* **1977**, *14*, 1209-1214.
